# Supplementary material
Source: publisher figshare collection journal article supplement (https://gsajournals.figshare.com/articles/dataset/_/12721535)

All\_564

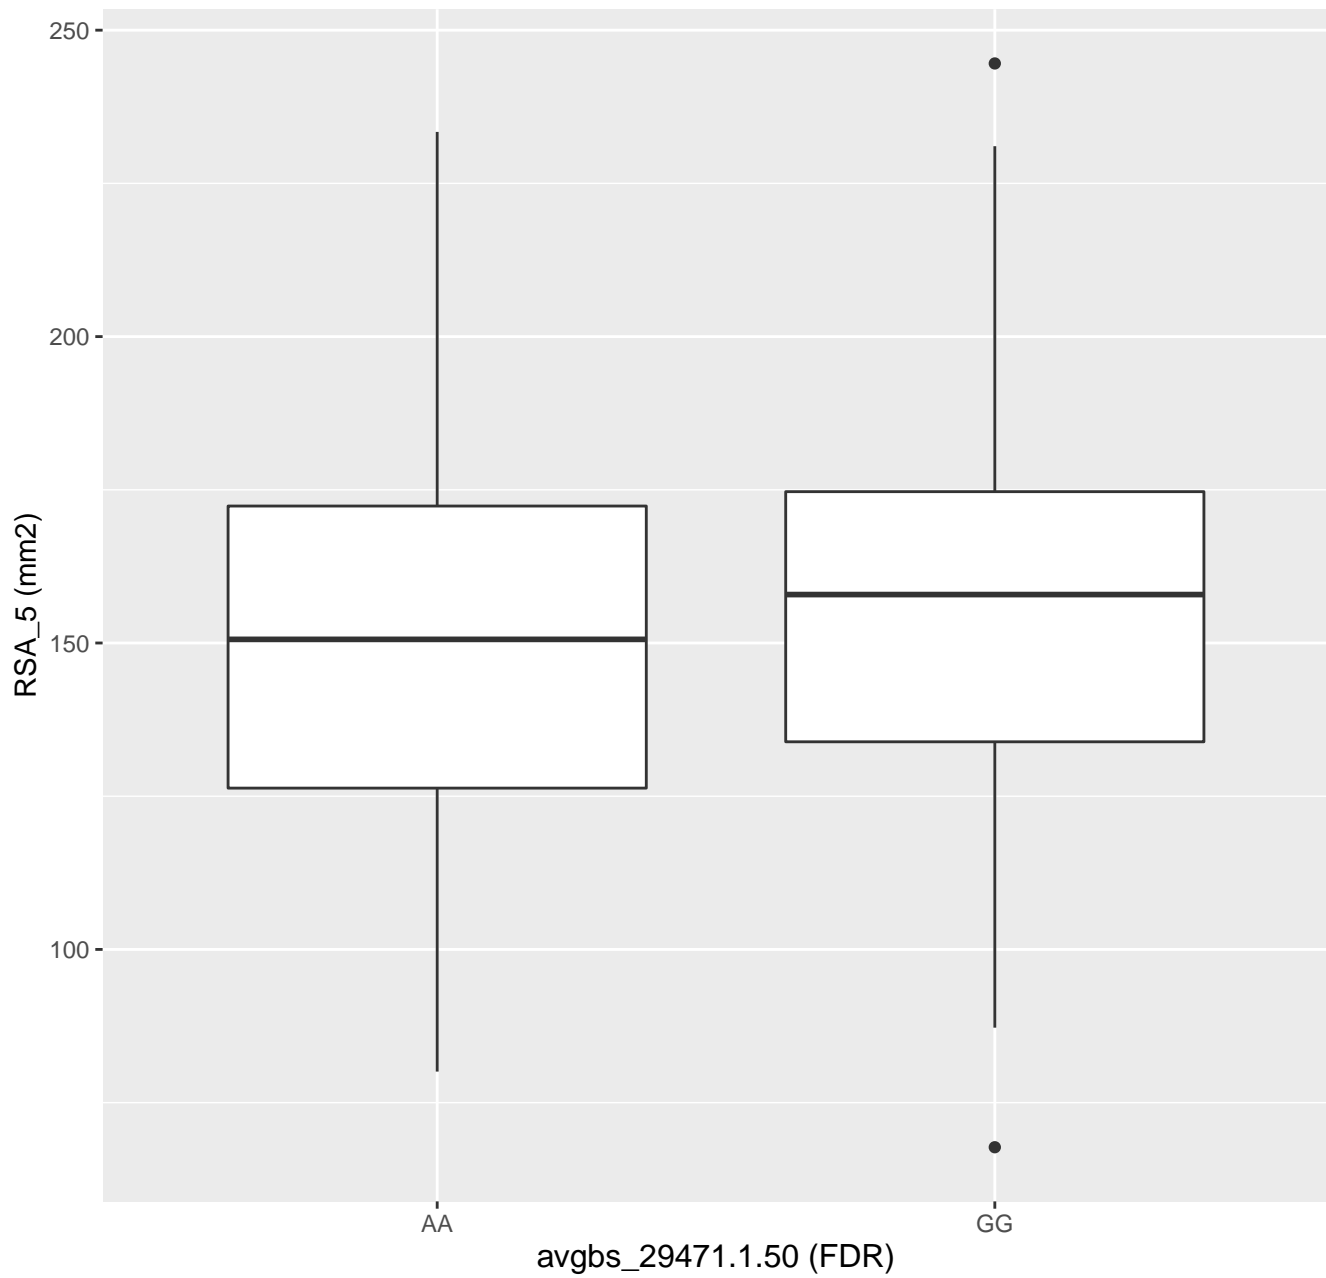

All\_564

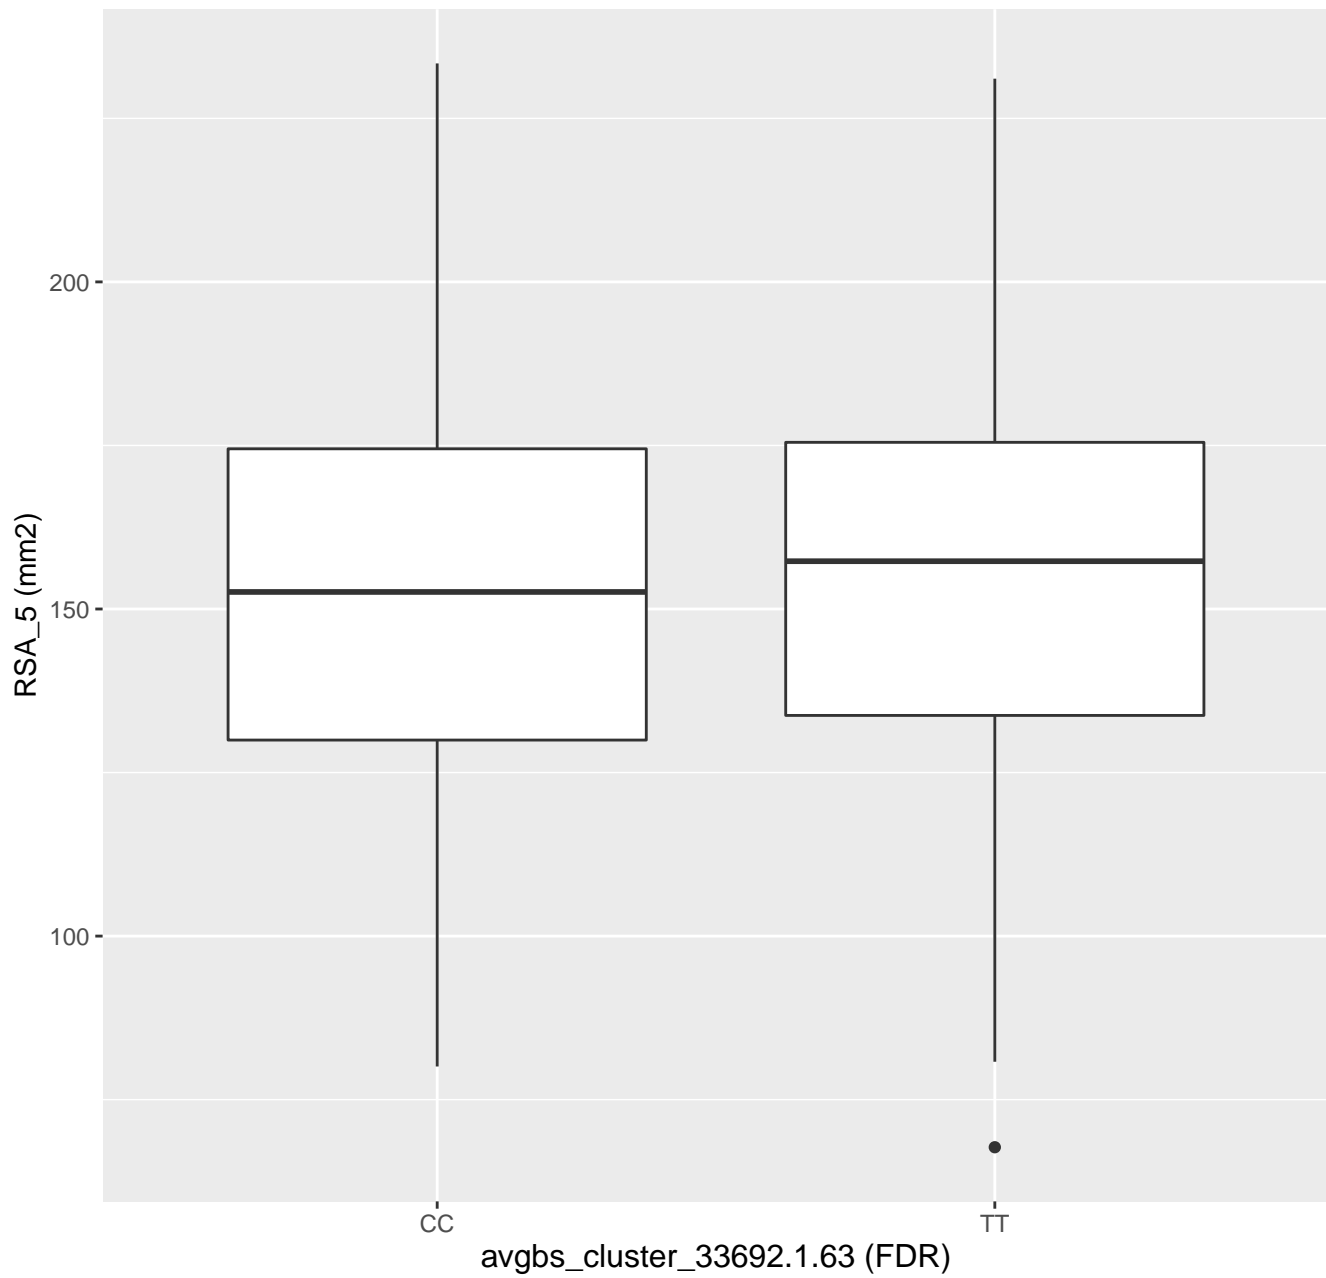

All\_564

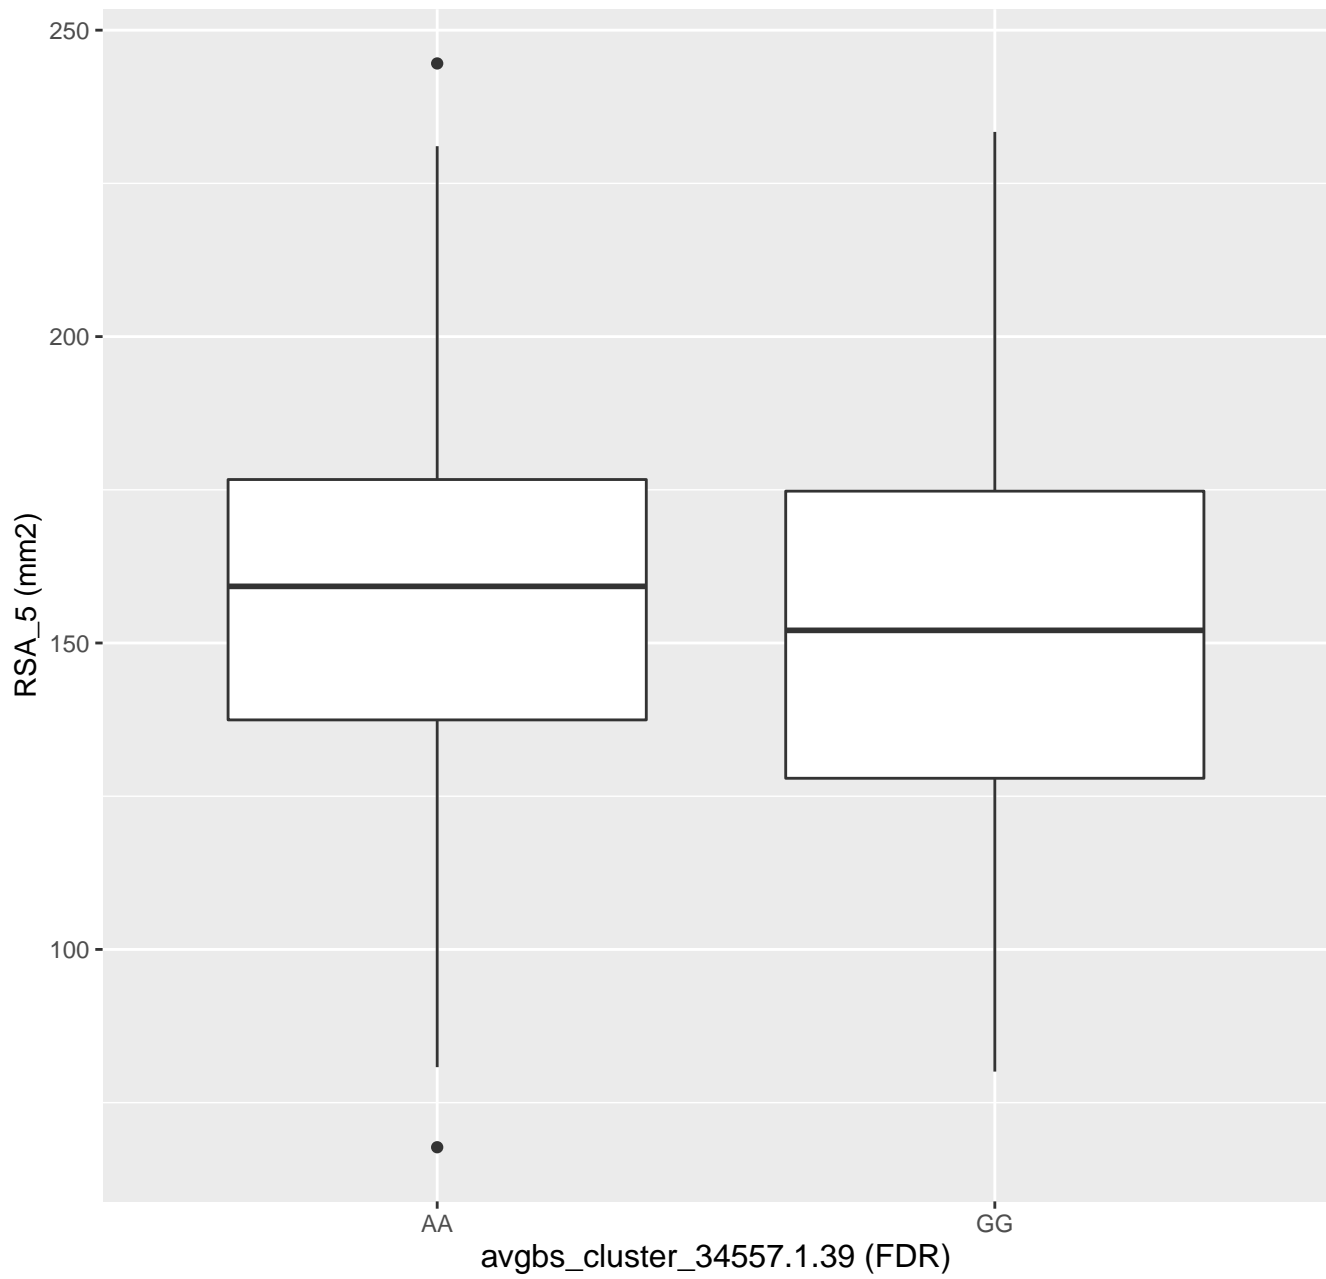

All\_564

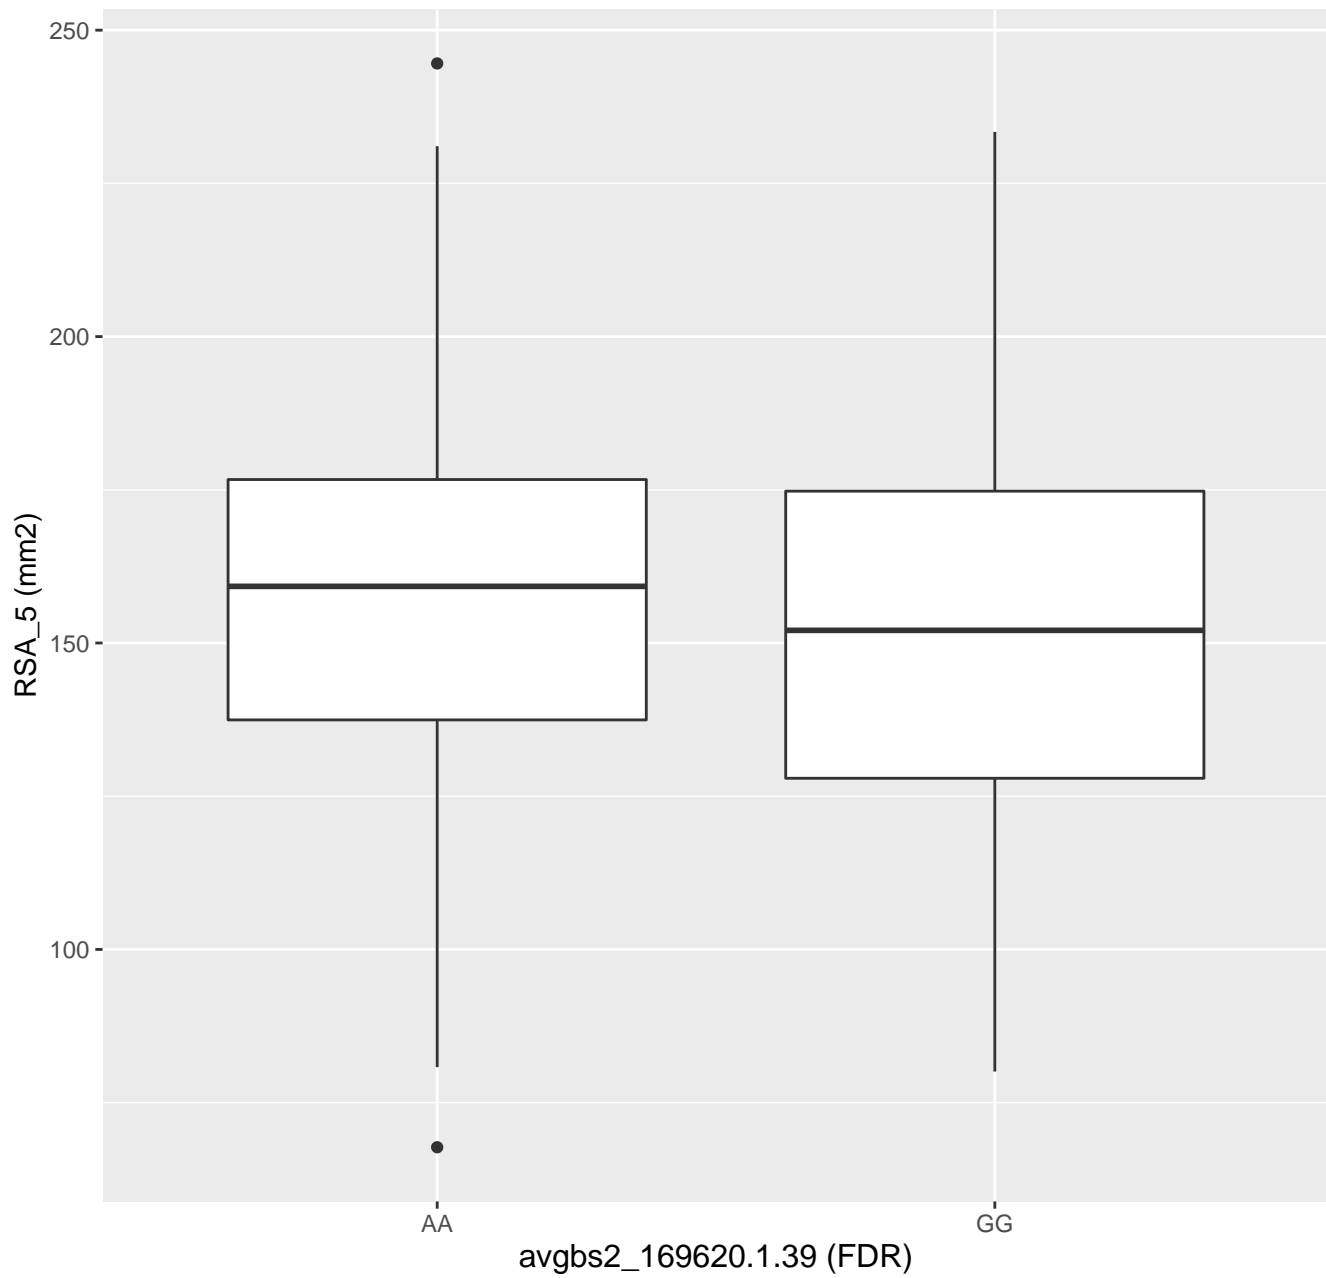

All\_564

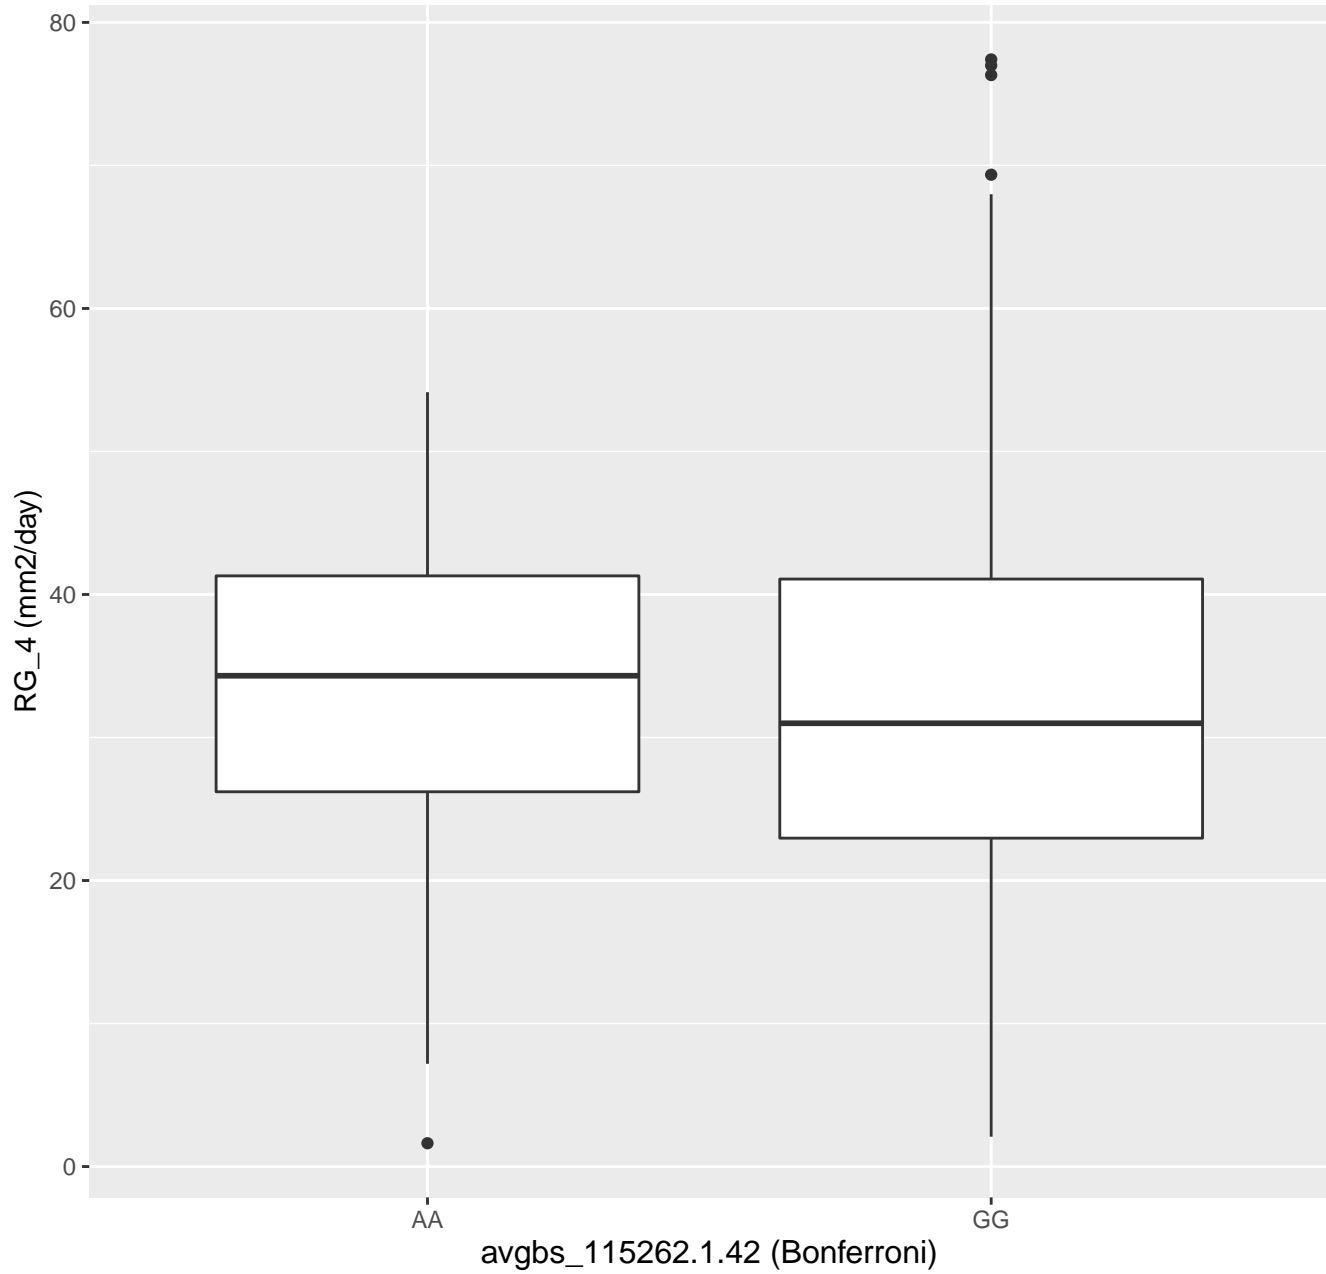

All\_564

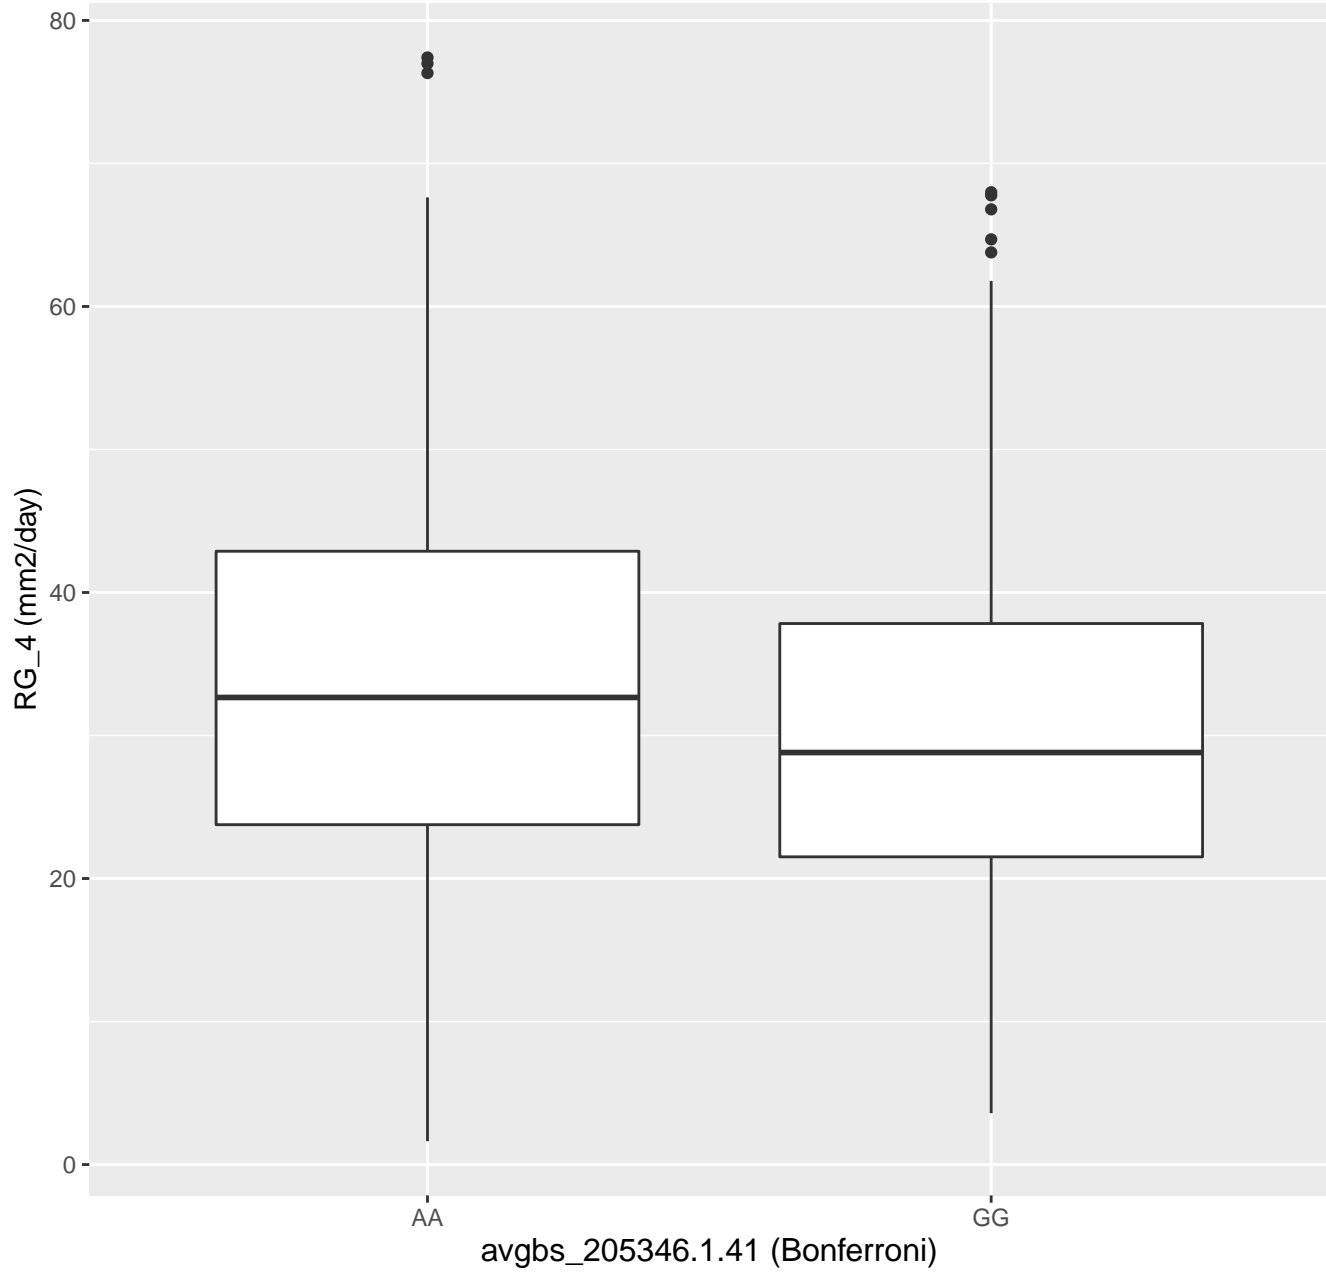

All\_564

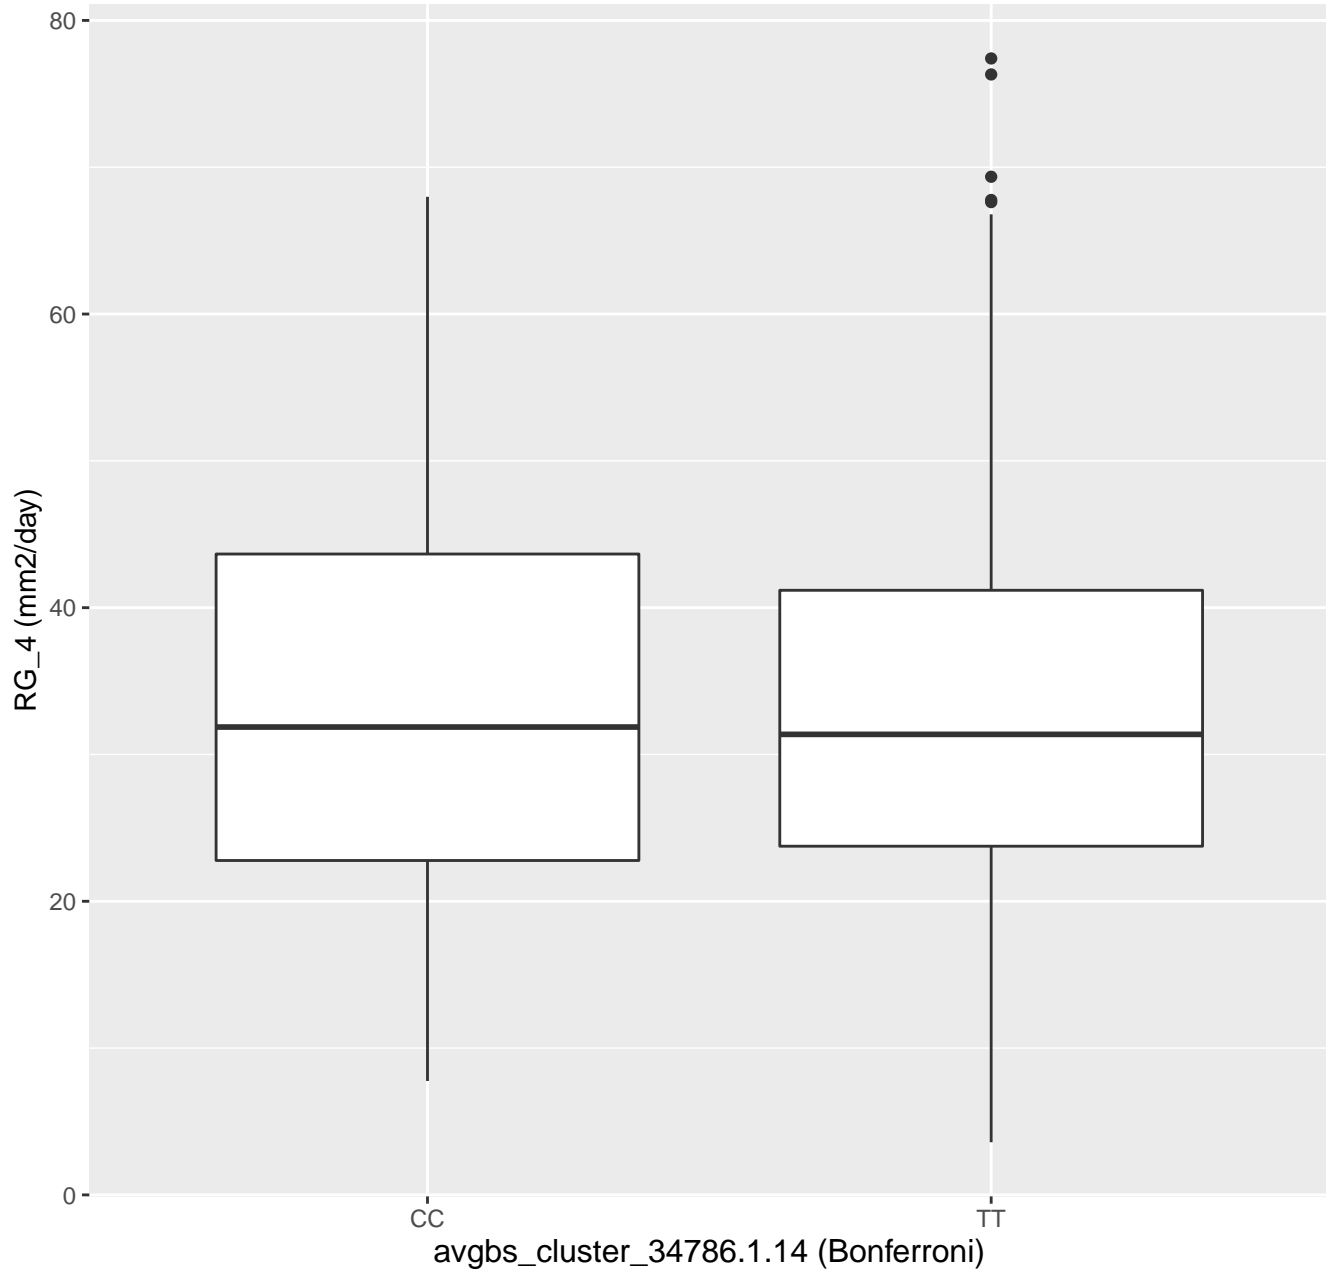

All\_564

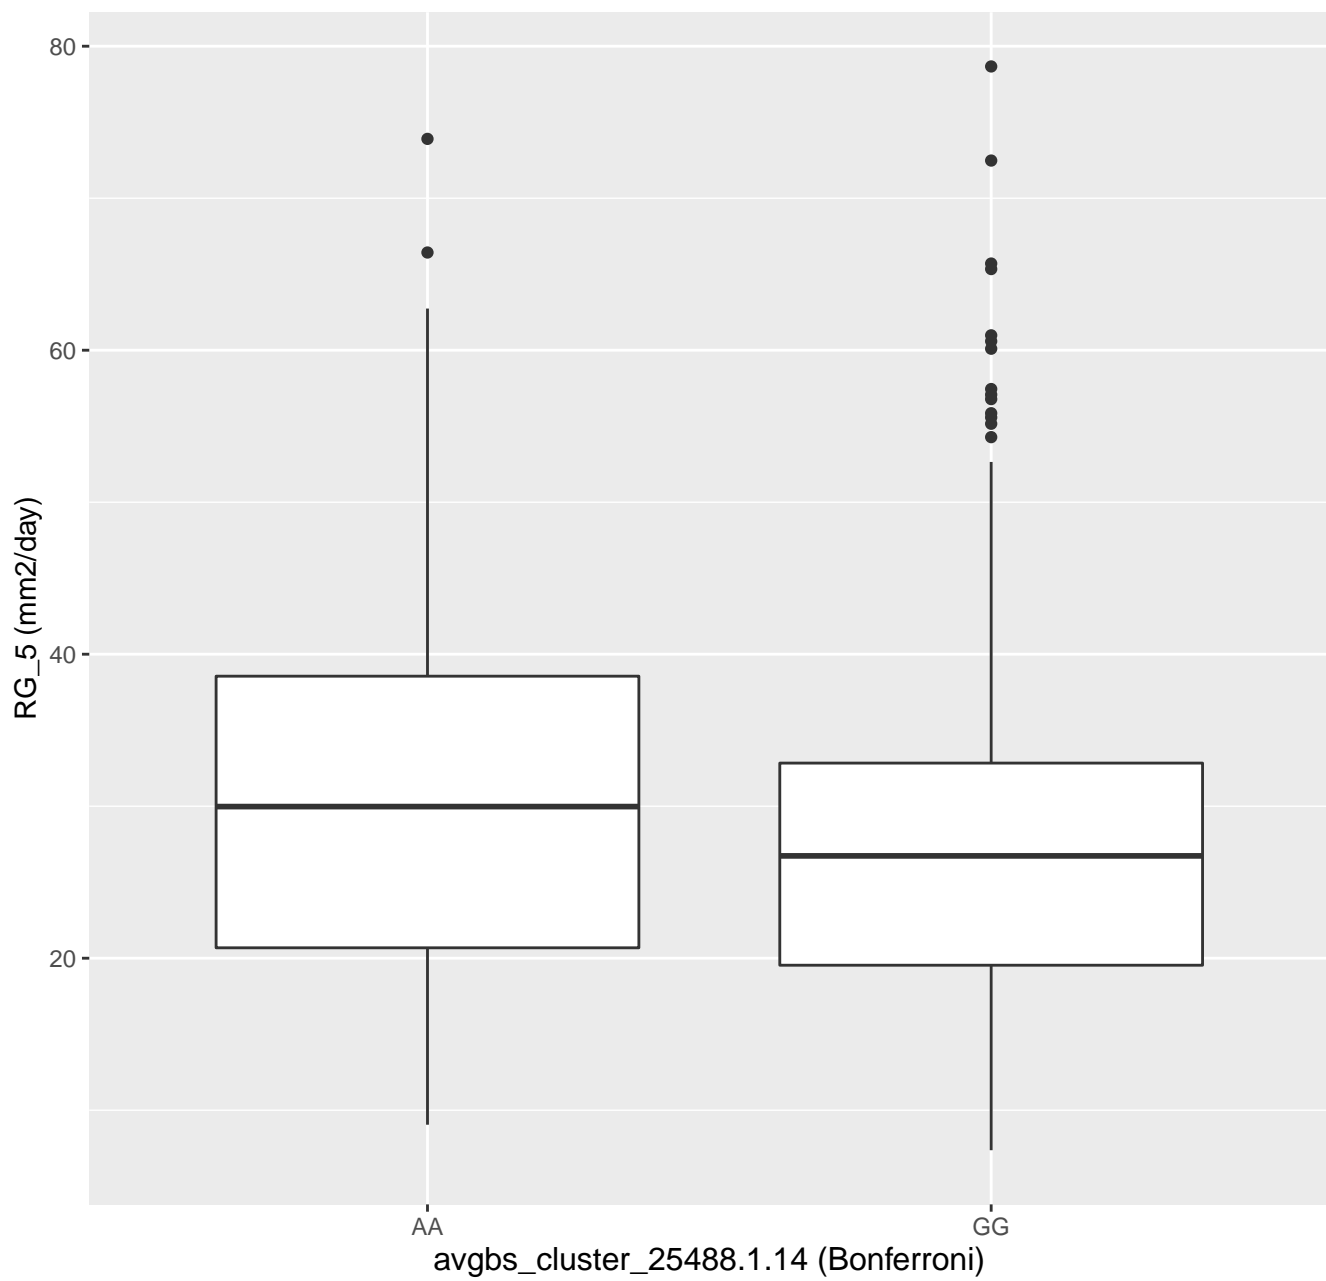



All\_564

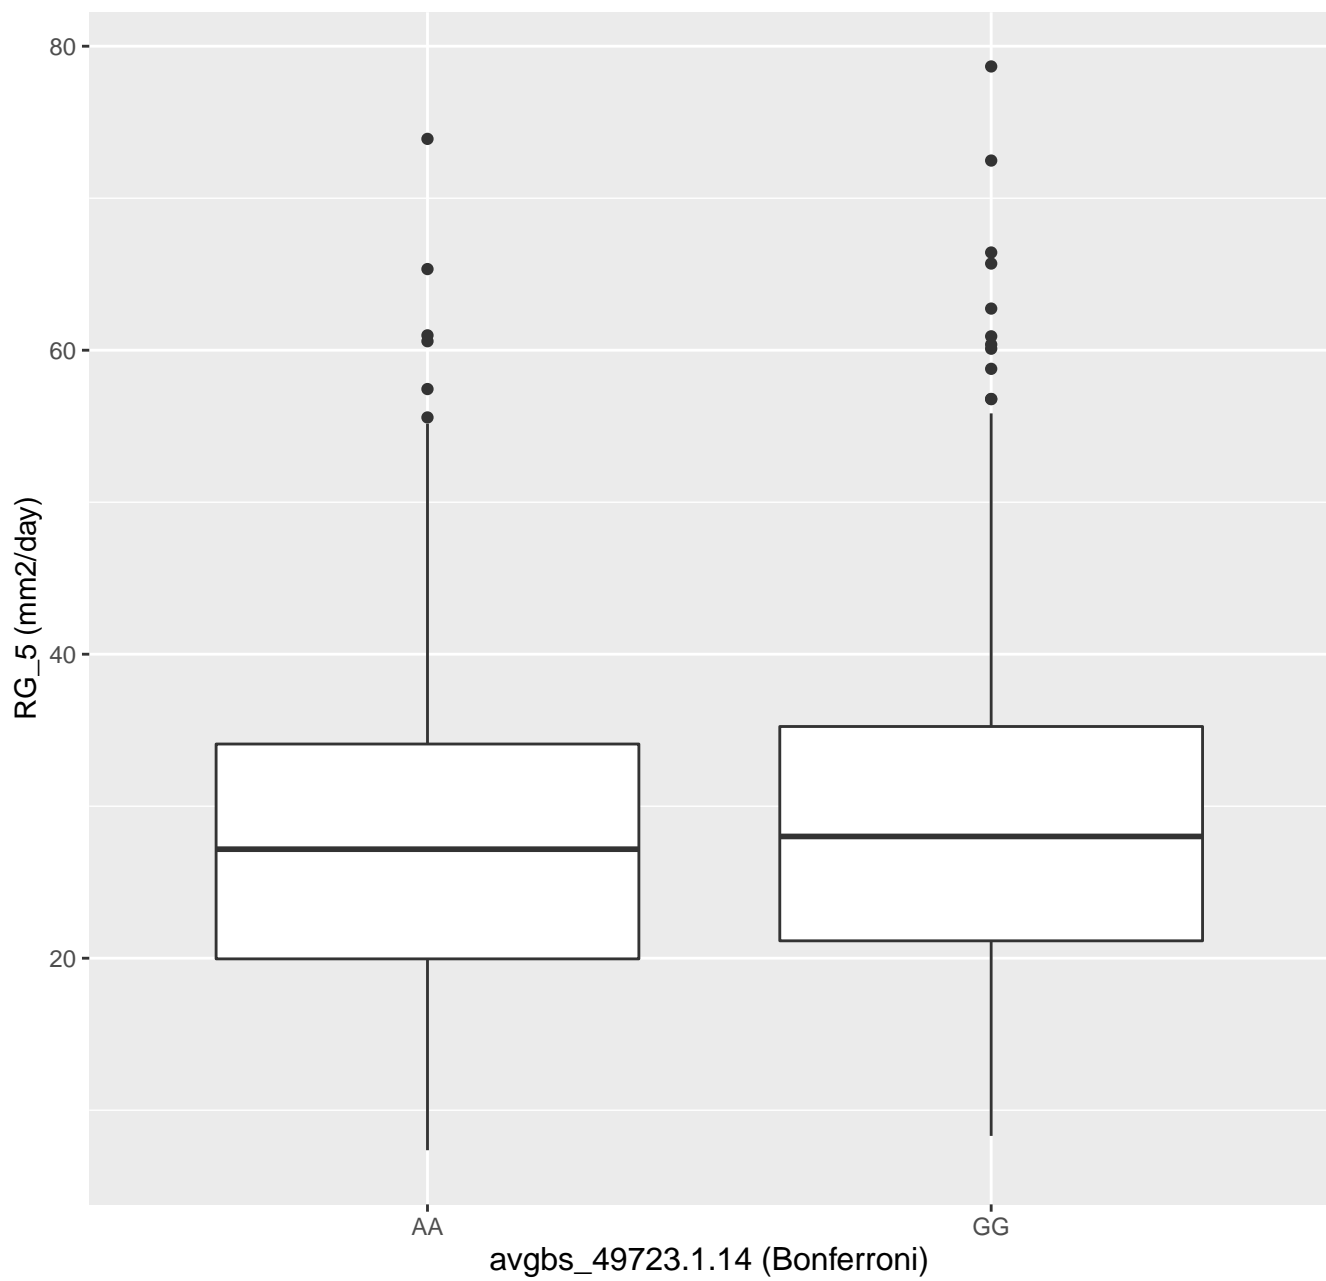

All\_564

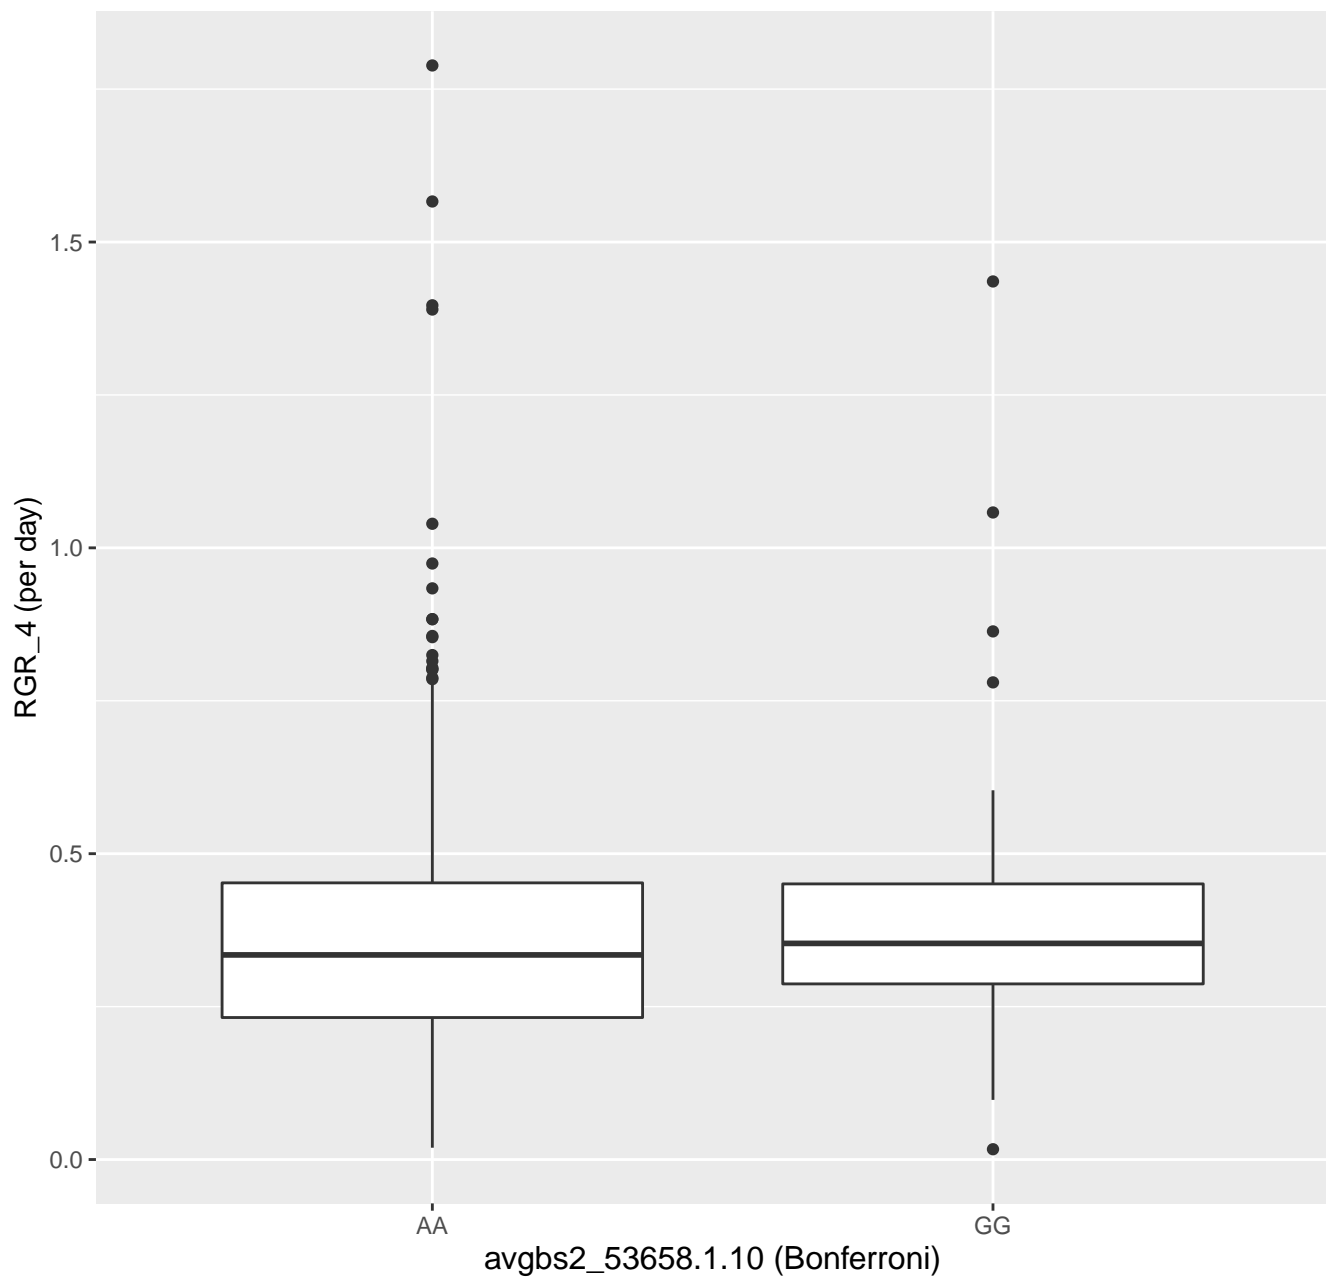

All\_564

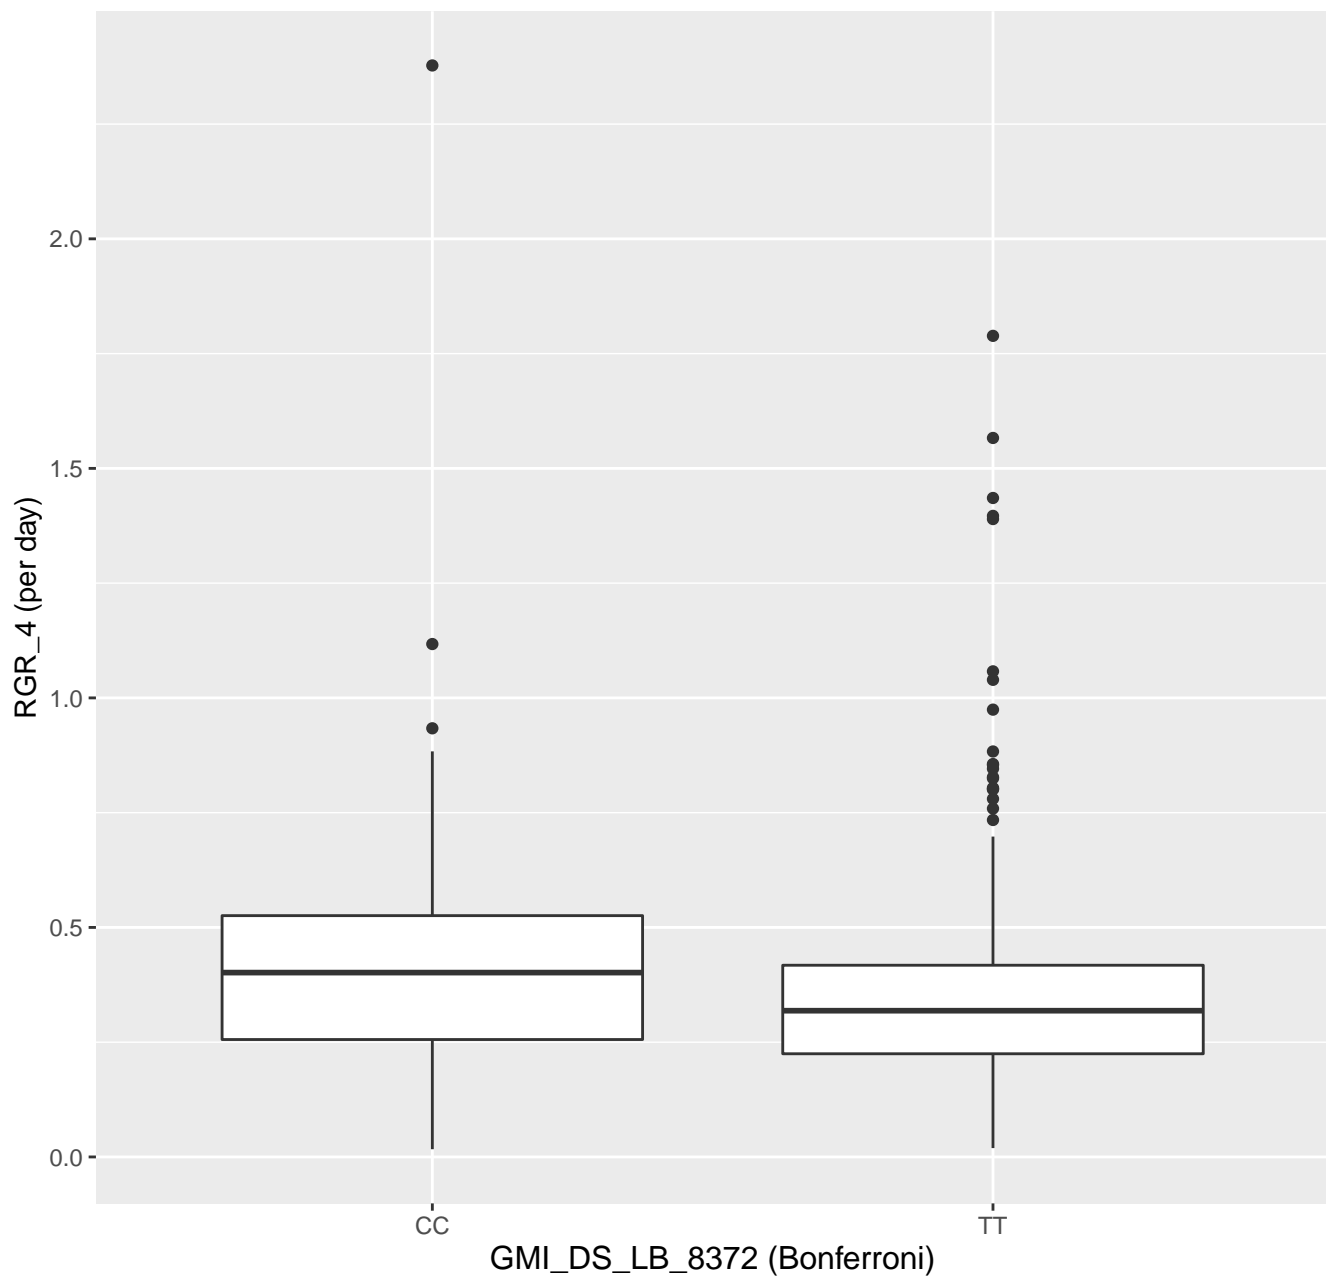

All\_564

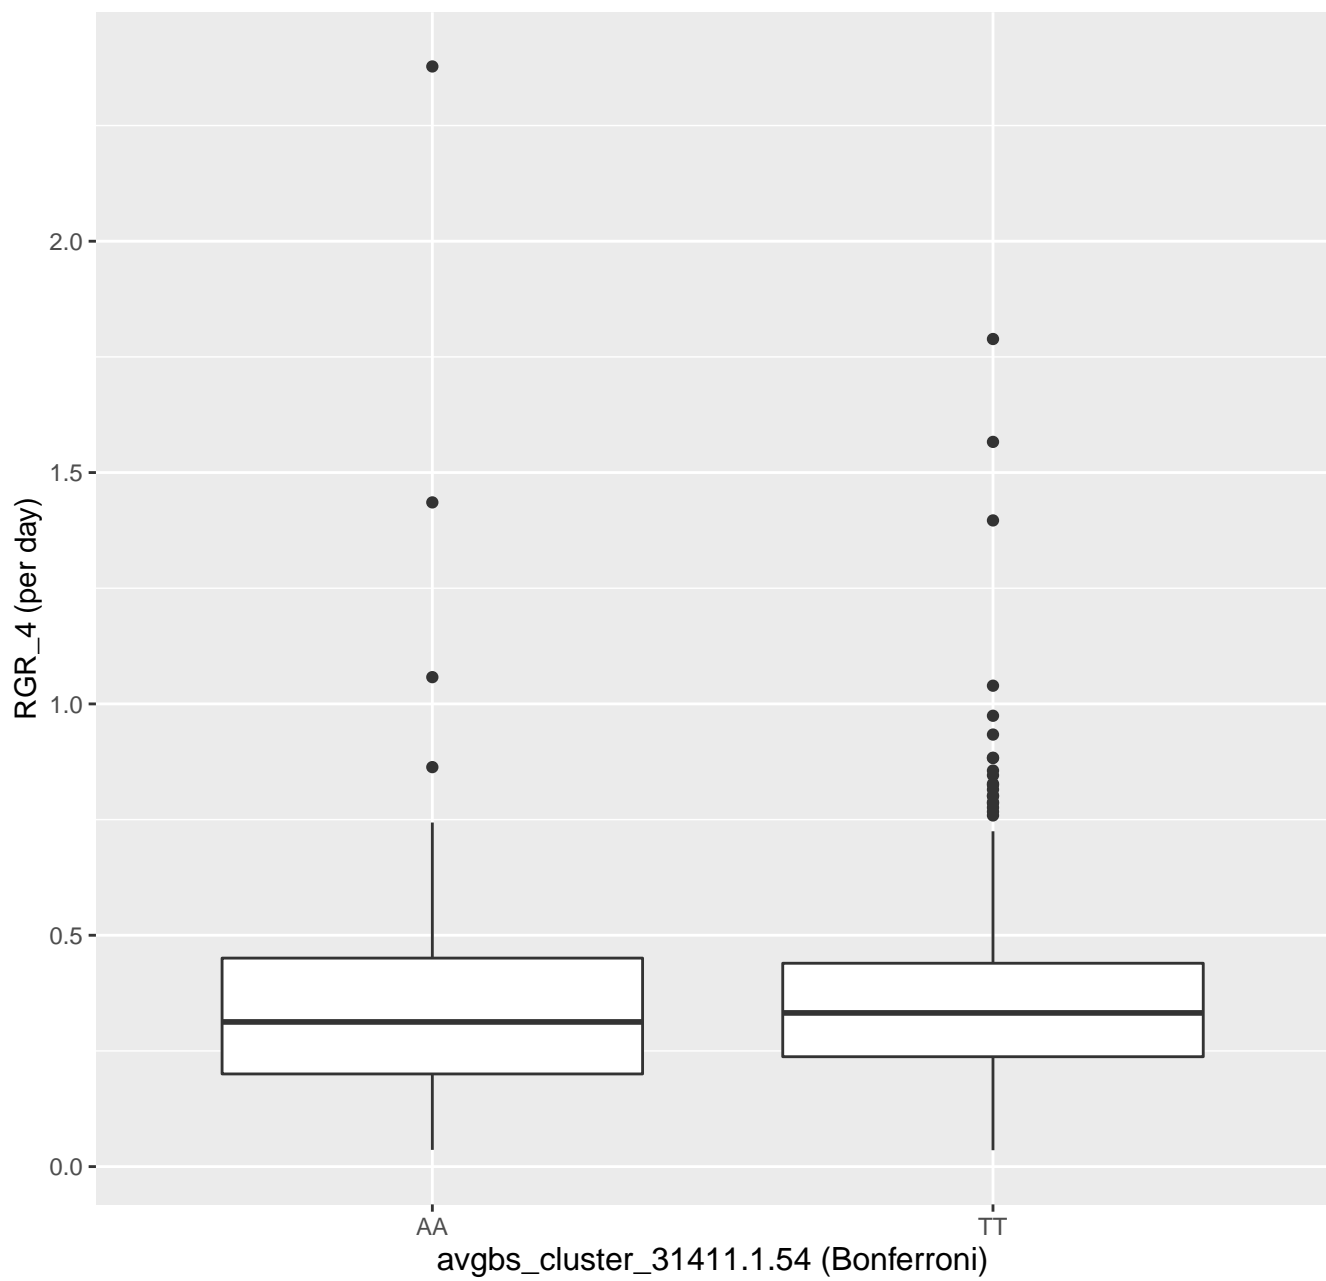

All\_564

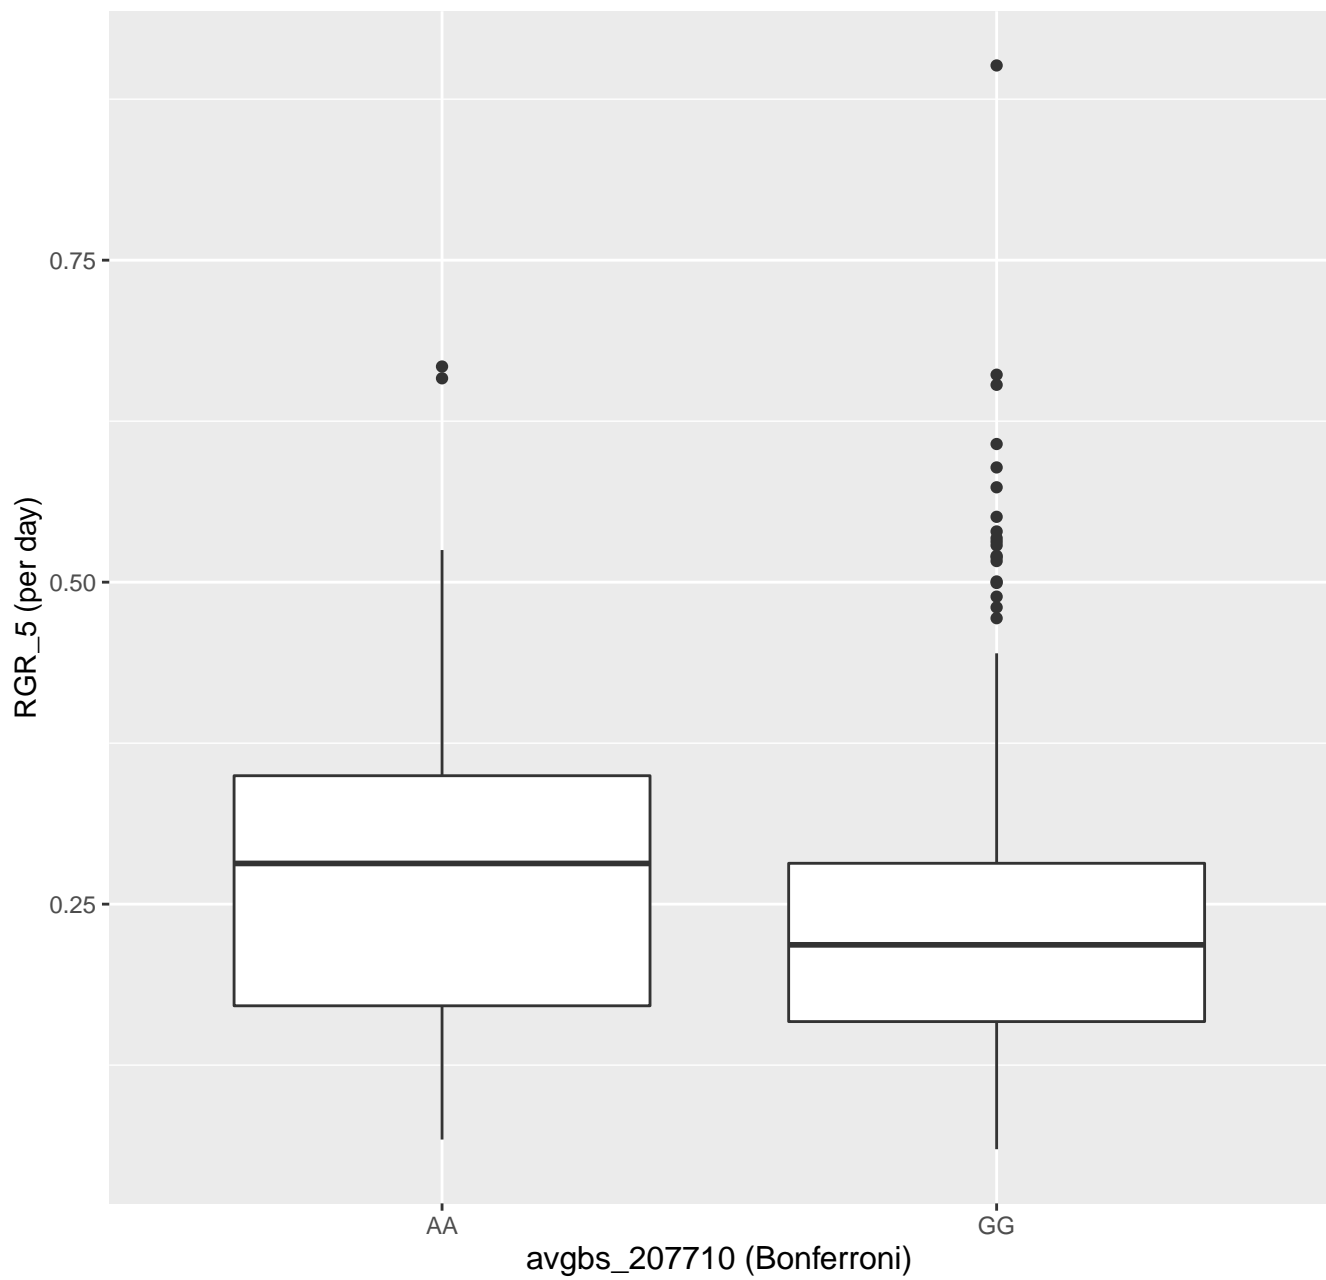

All\_564

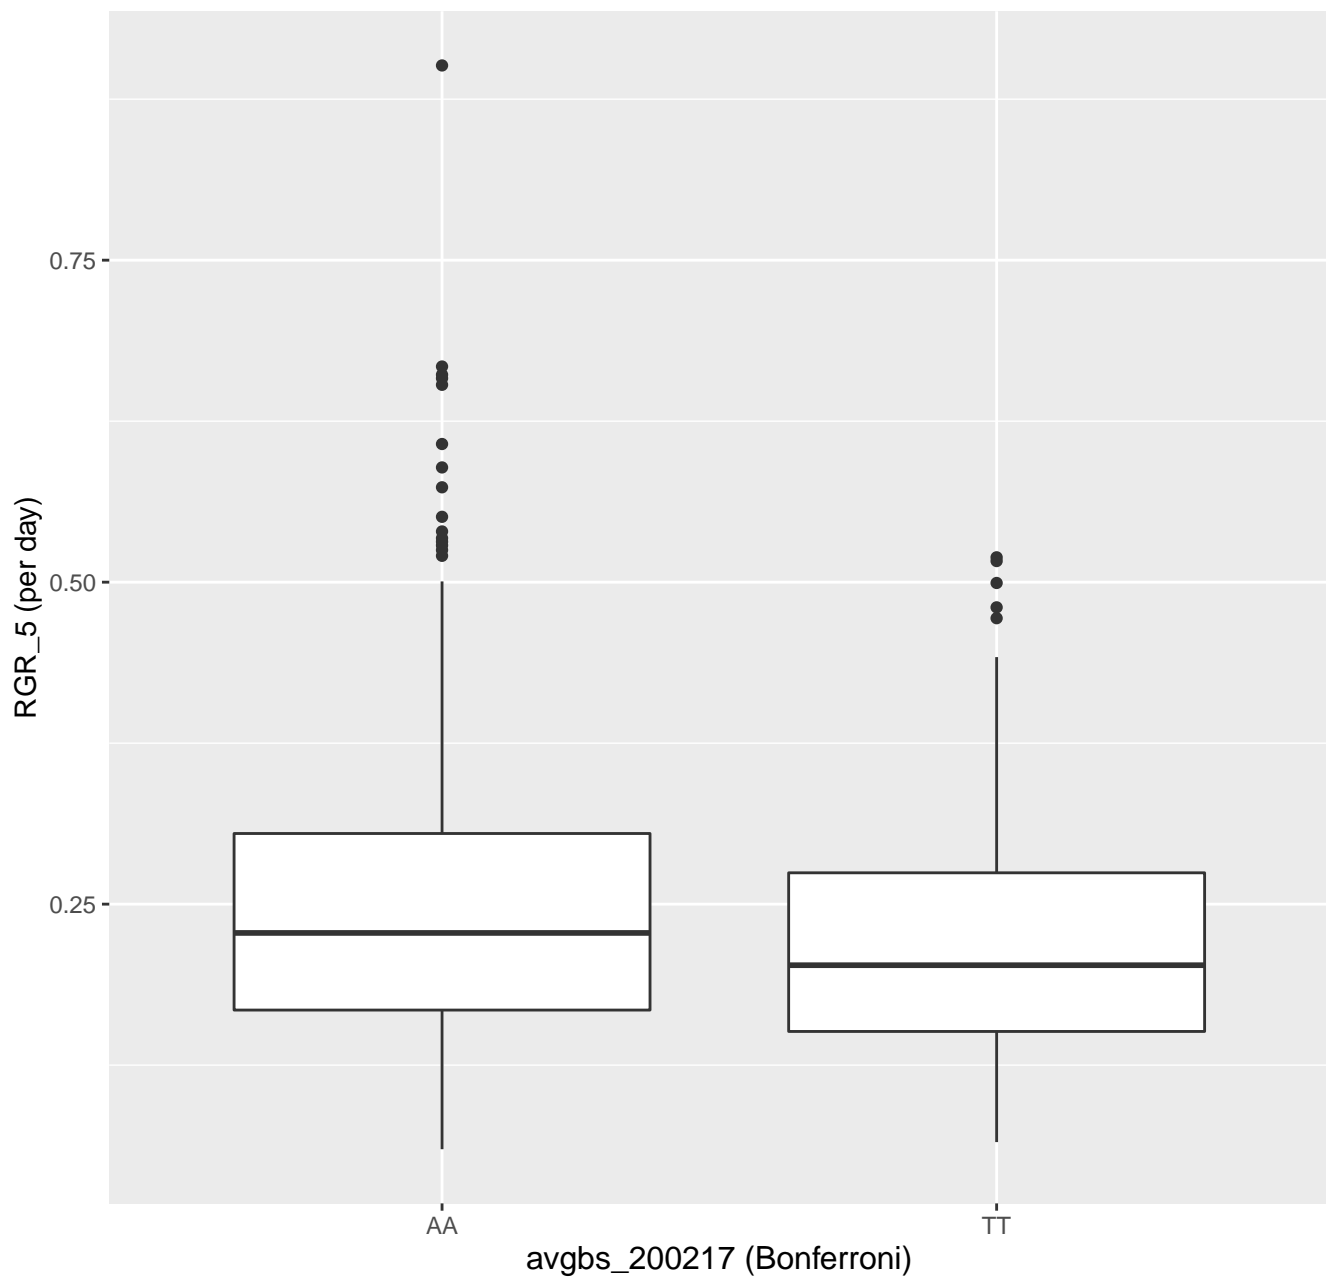

All\_564

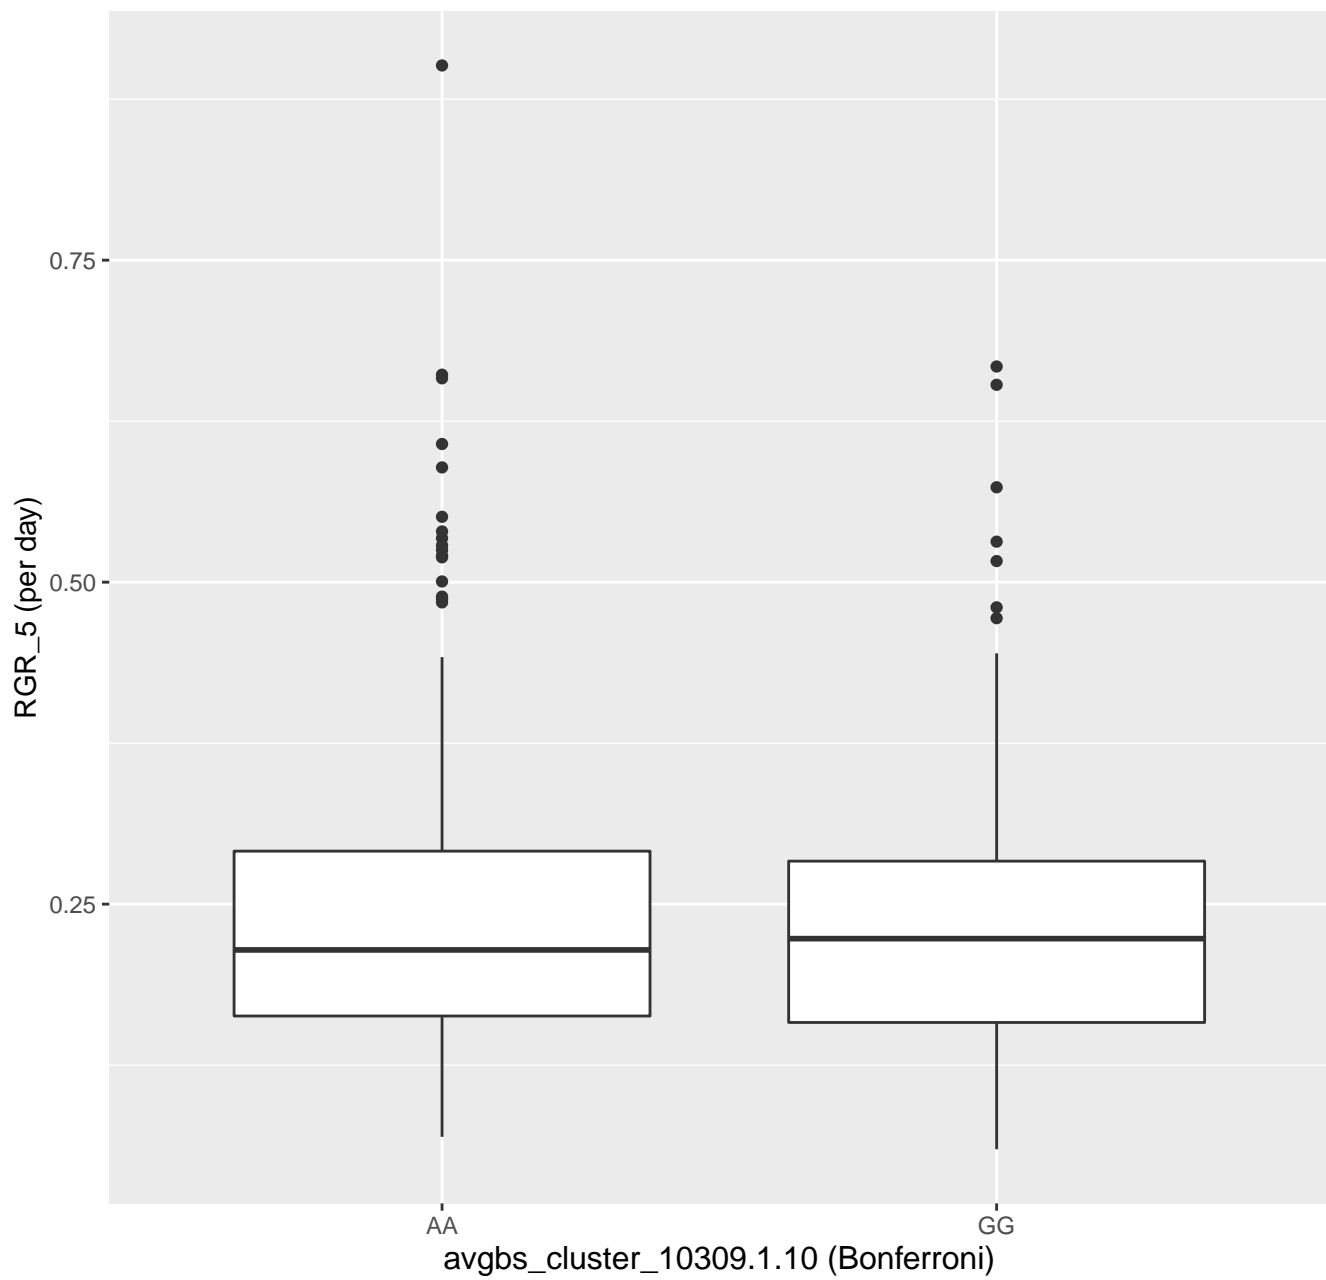

All\_568

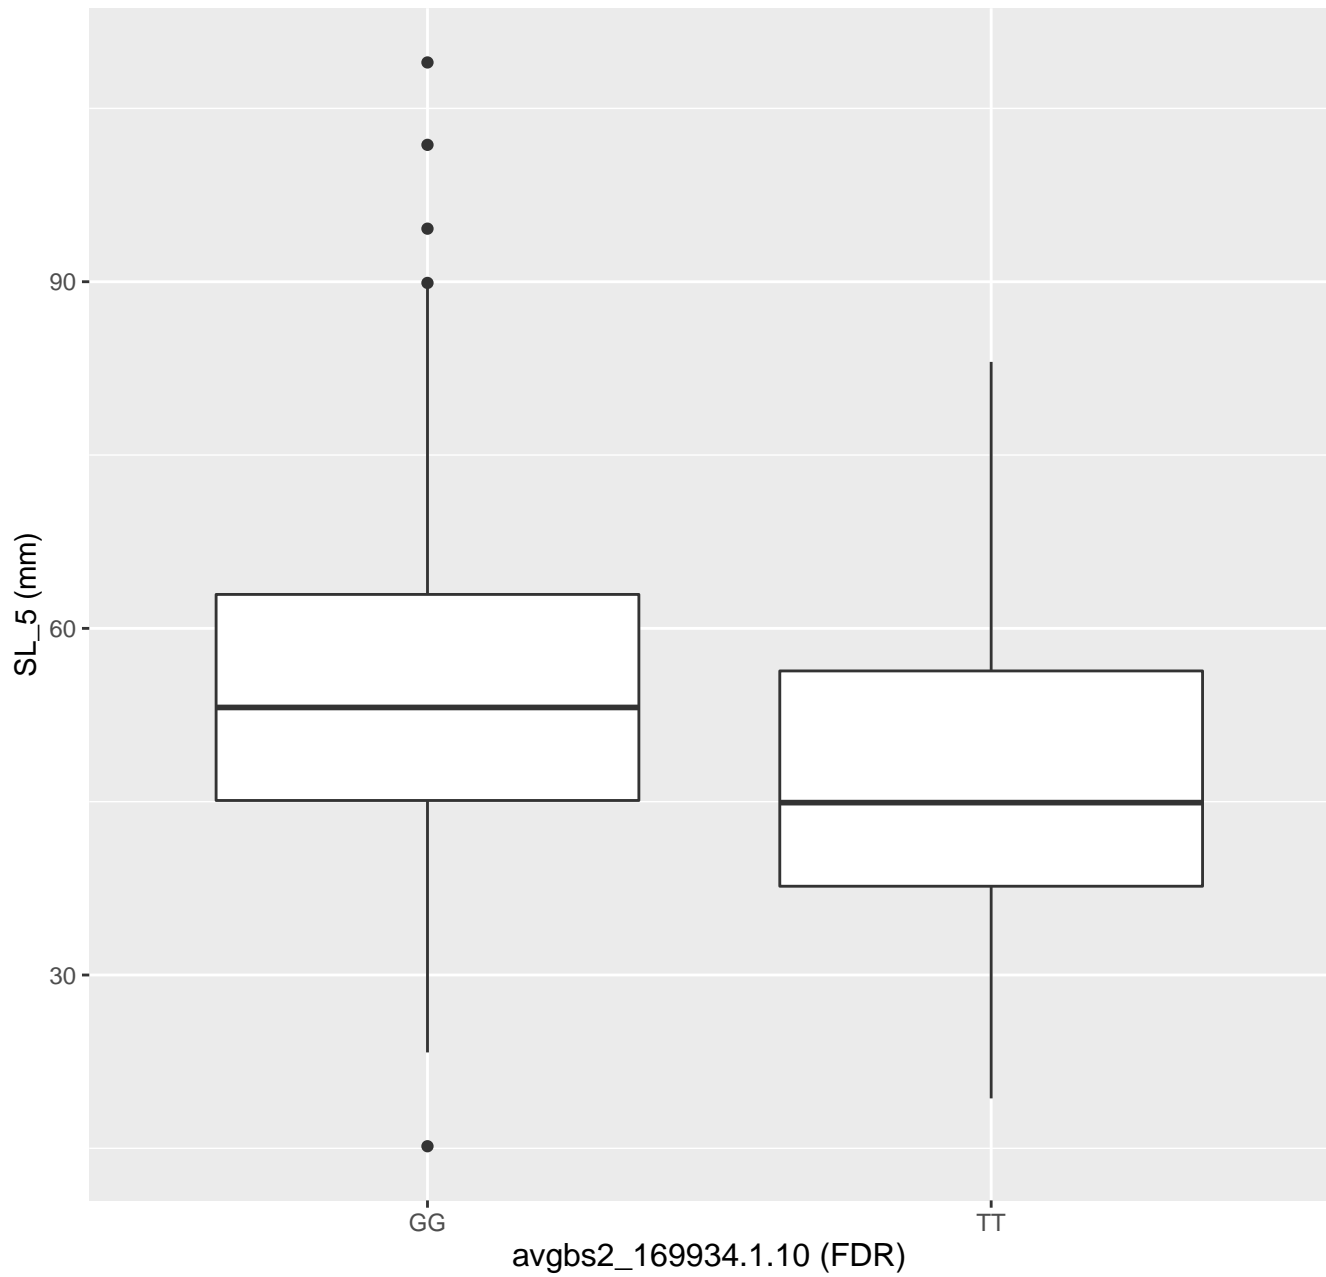



All\_568

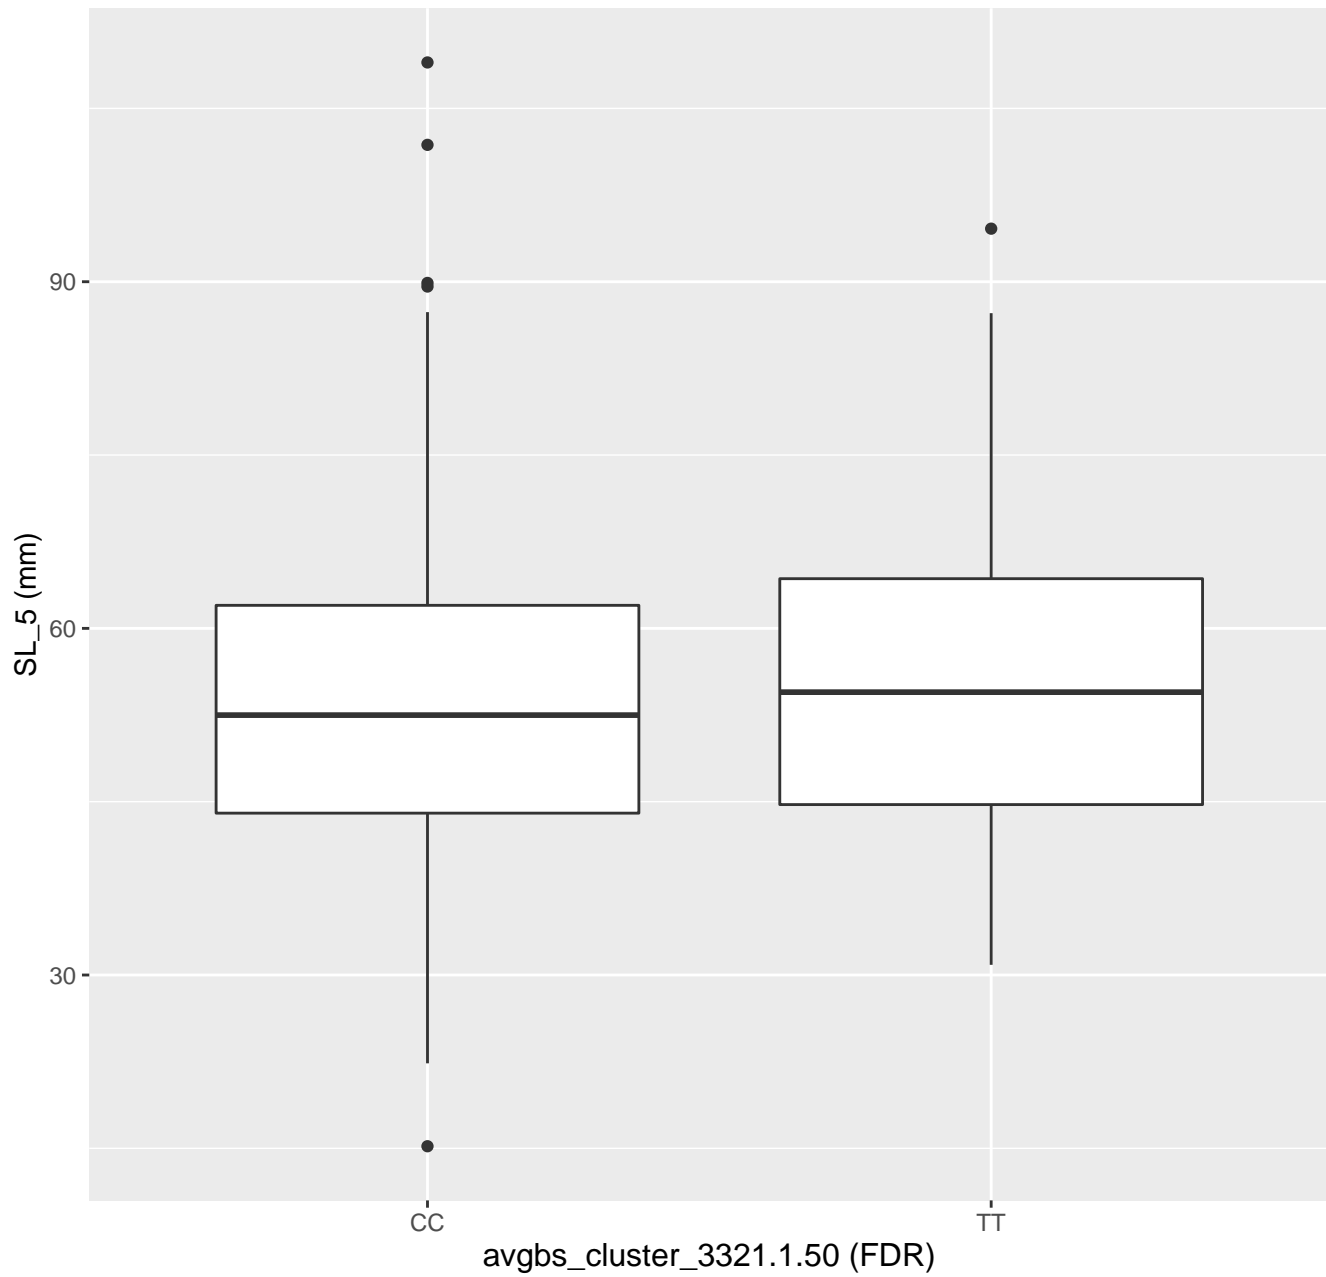

All\_568

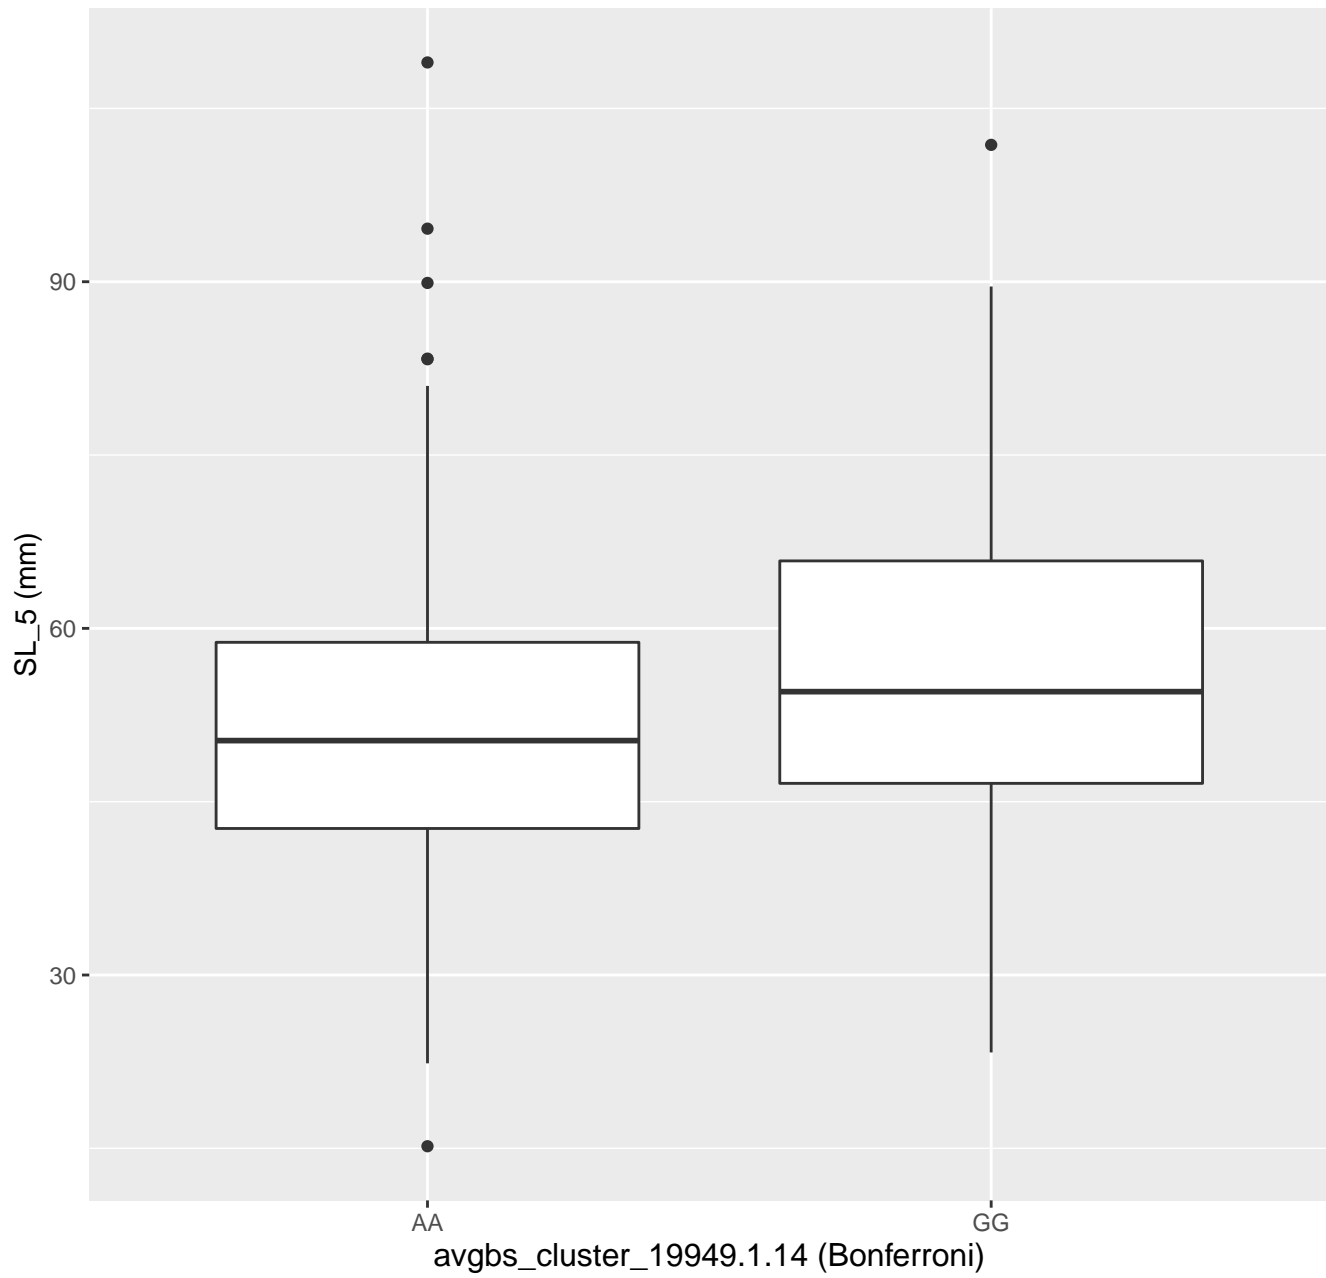

All\_568

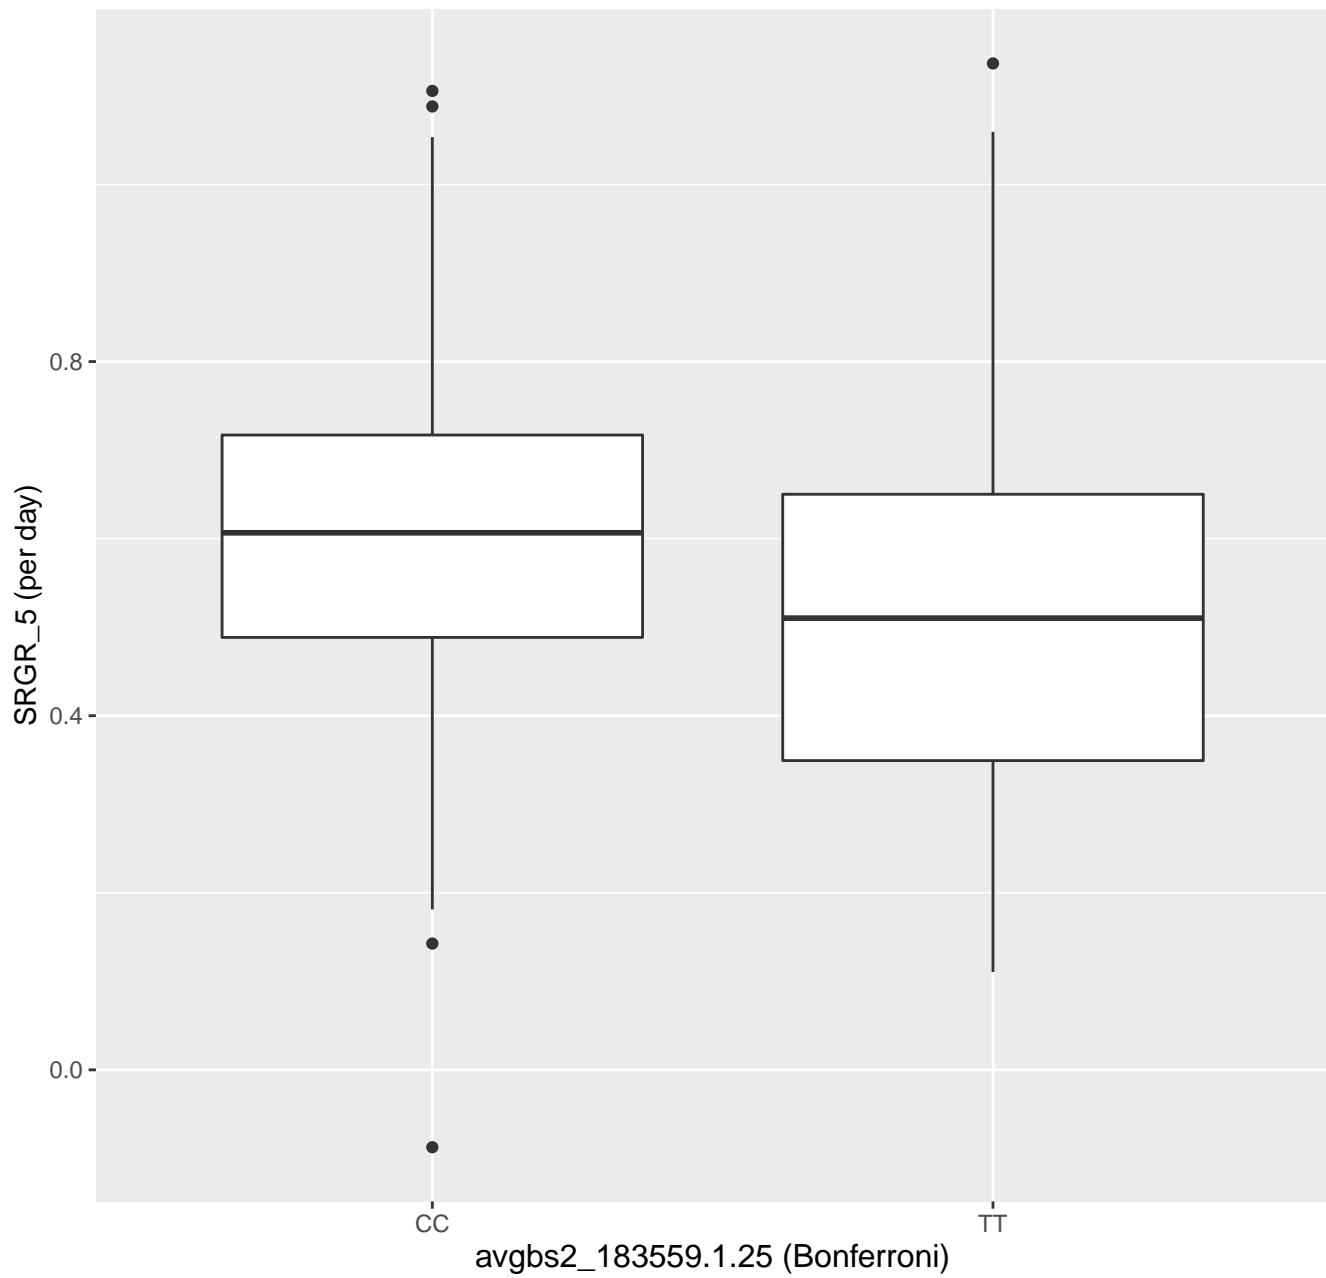

All\_568

SRGR\_5 (per day)

1.0

0.5

0.0

AA

GG

avgbs\_220709.1.57 (Bonferroni)

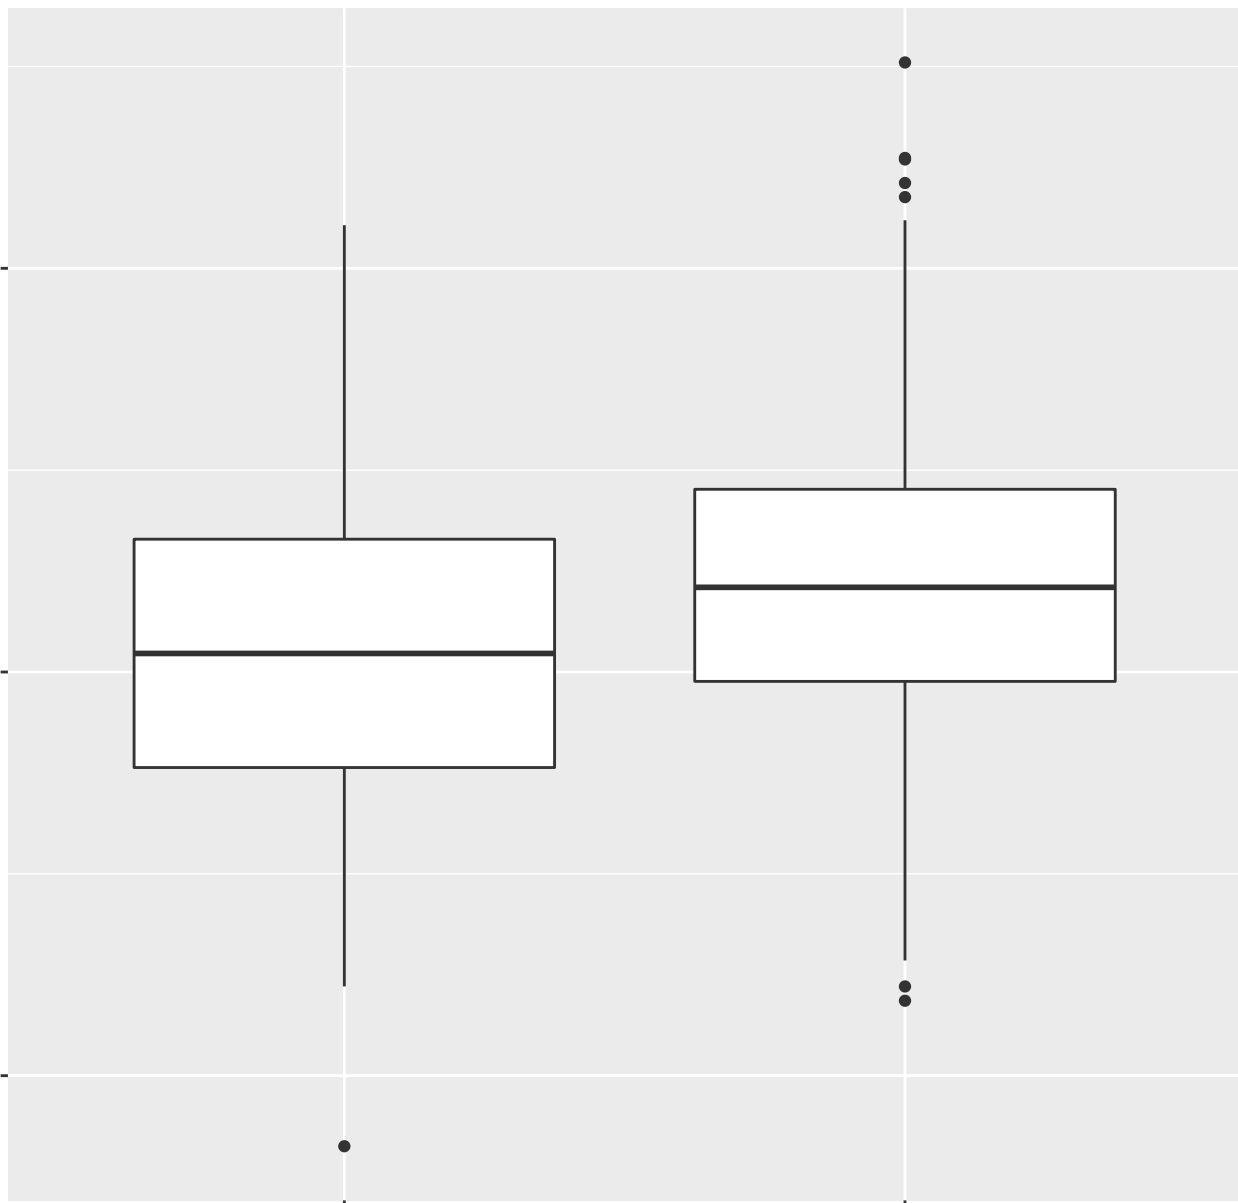

All\_568

SRGR\_5 (per day)

1.0

0.5

0.0

AA

GG

avgbs\_cluster\_19949.1.14 (Bonferroni)

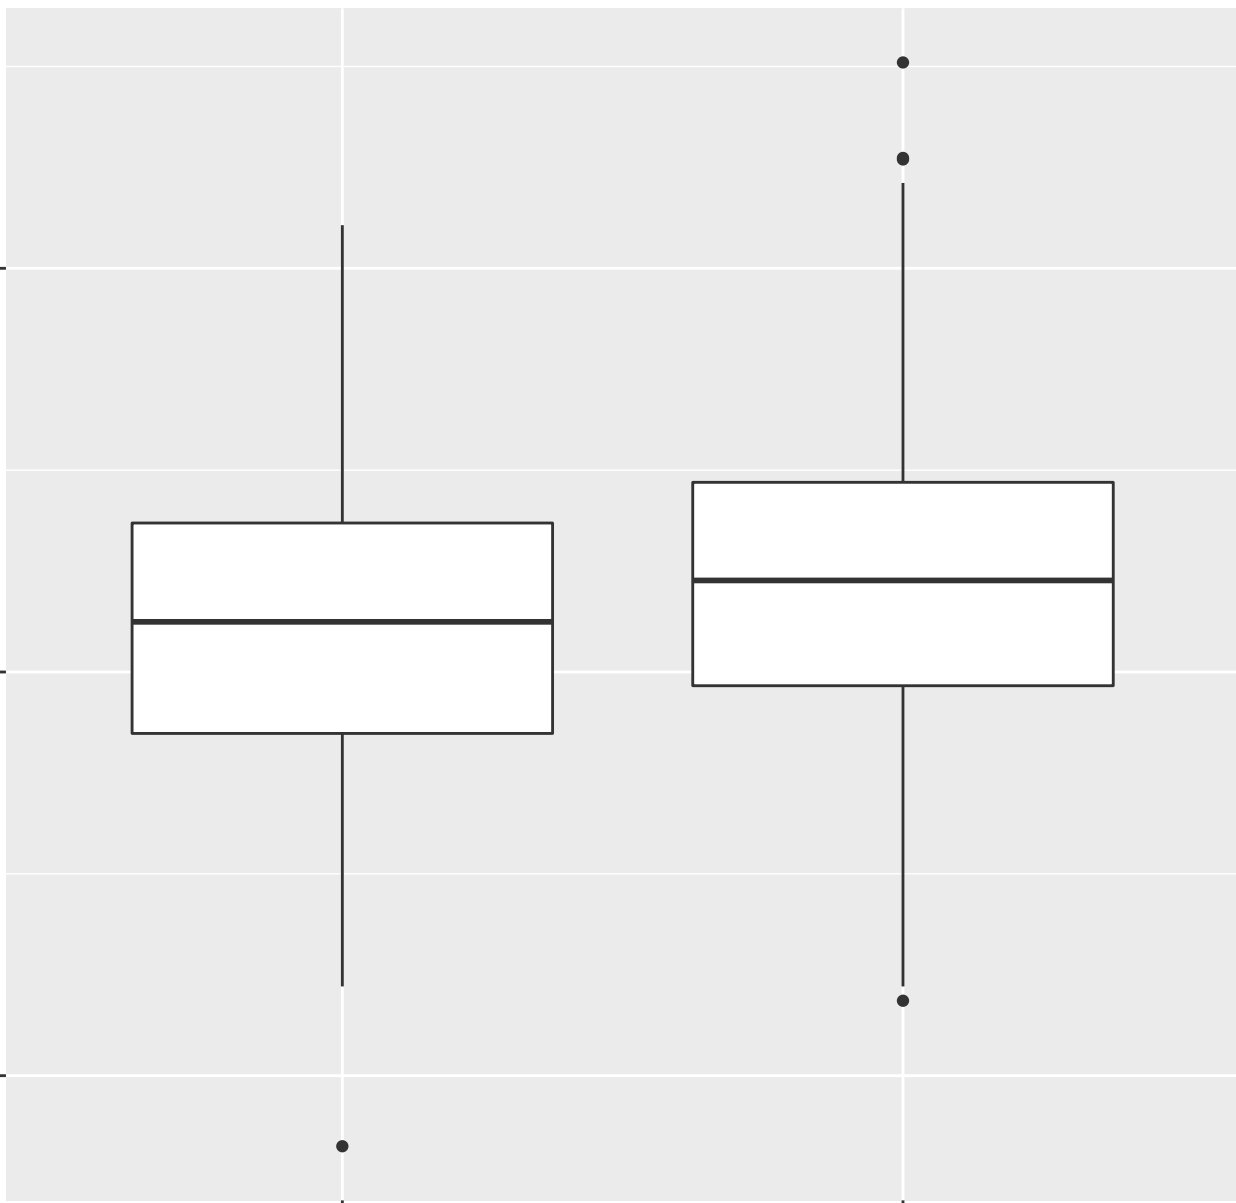

All\_568

SRGR\_5 (per day)

1.0

0.5

0.0

AA

GG

avgbs\_22768 (Bonferroni)

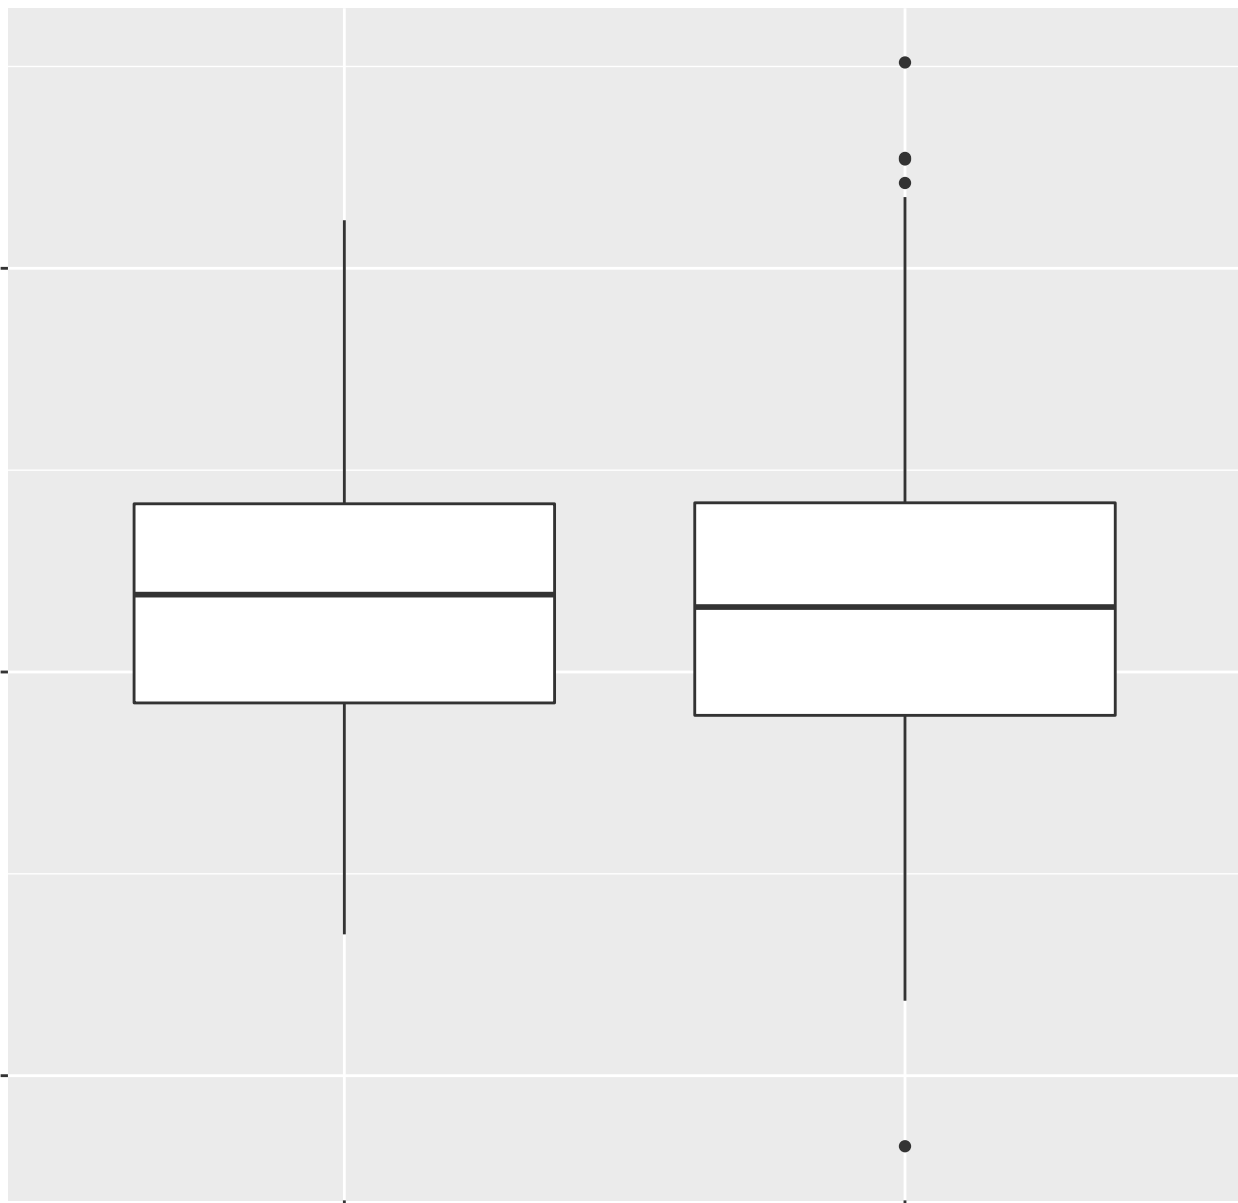

Supplement: Supplementary file 3 [file 1]
