# Supplementary material
Source: publisher figshare collection journal article supplement (https://gsajournals.figshare.com/articles/dataset/_/12721535)

Supplementary S3. Manhattan plots and quantile-quantile plots for selected GWAS models of each trait. NTU stands for Taipei, USDA for Aberdeen. “D” means “Day”. The number of PC selected is indicated at the title.

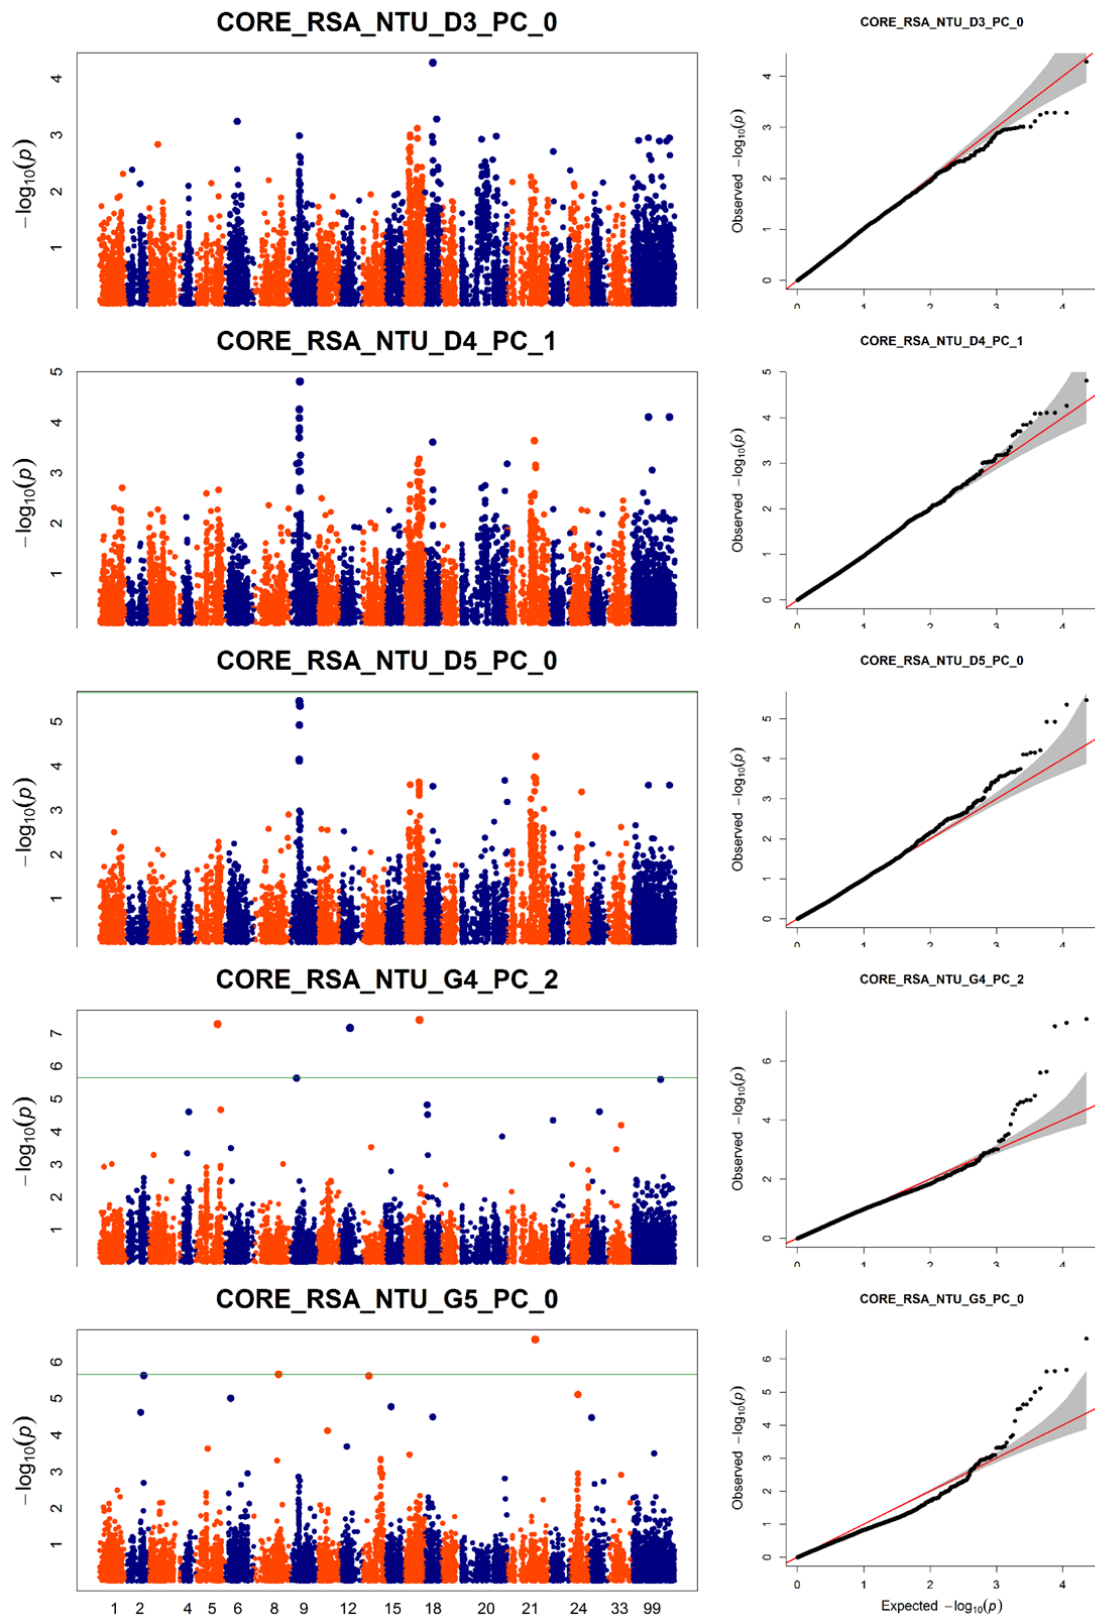

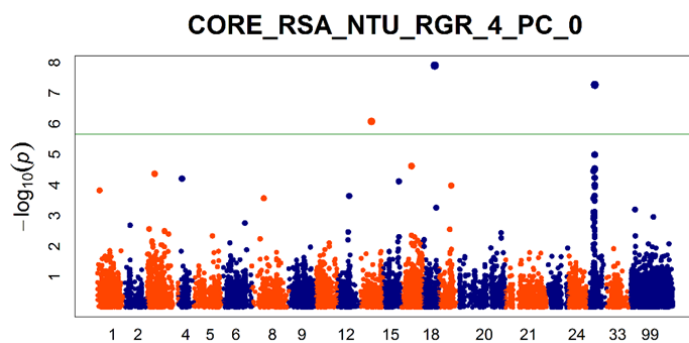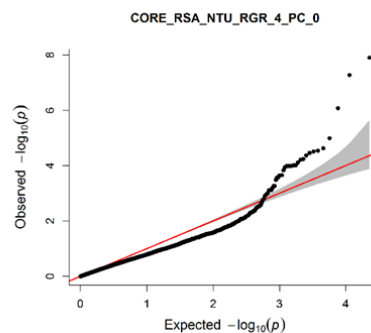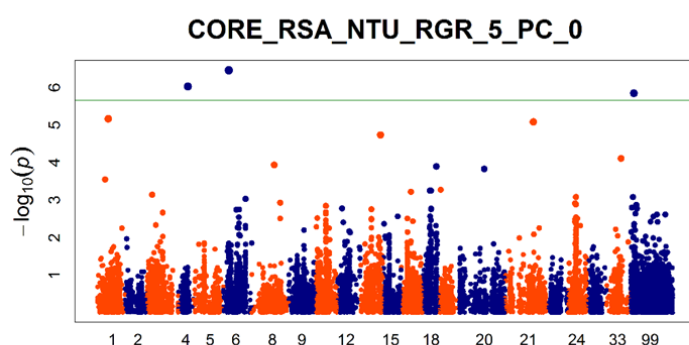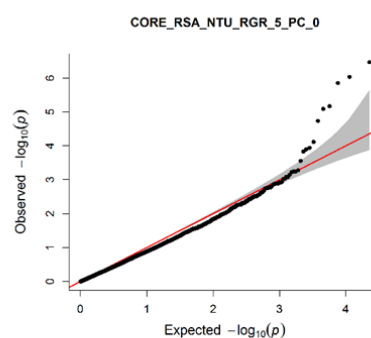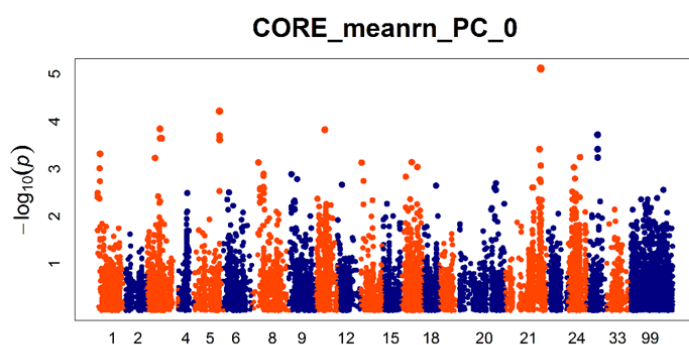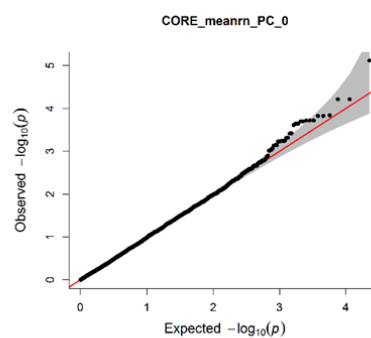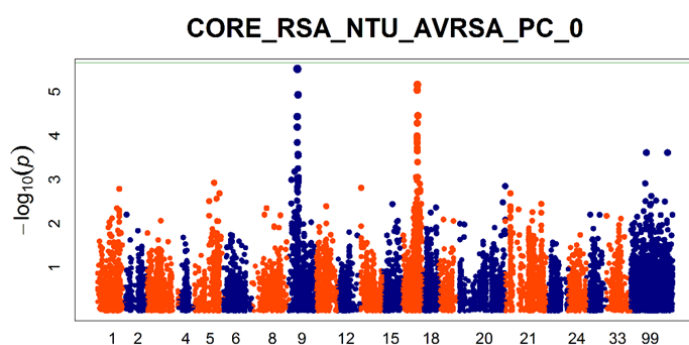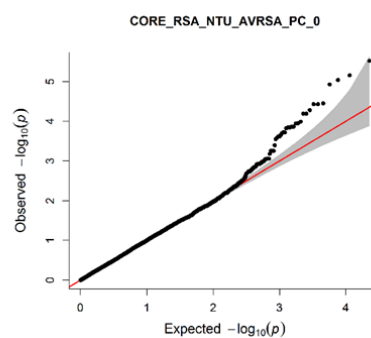

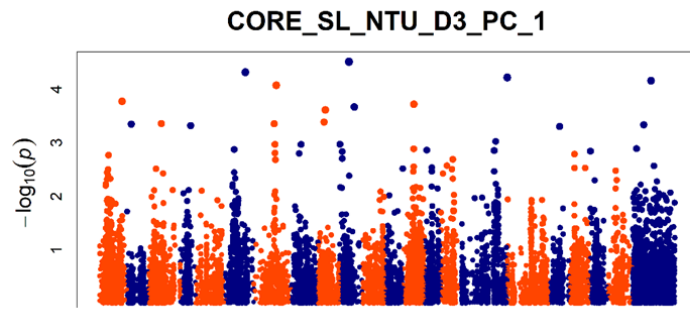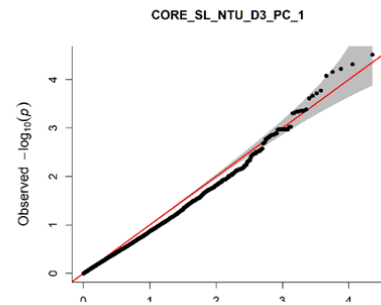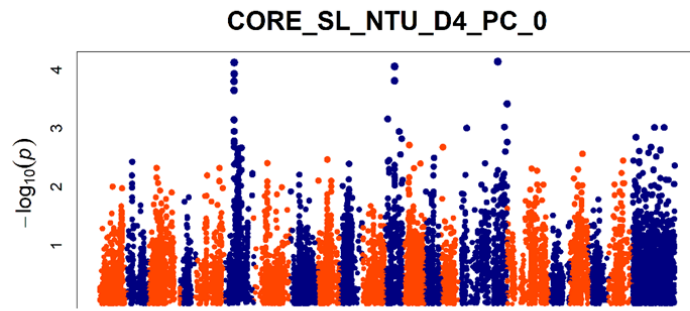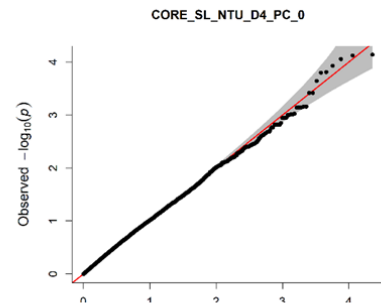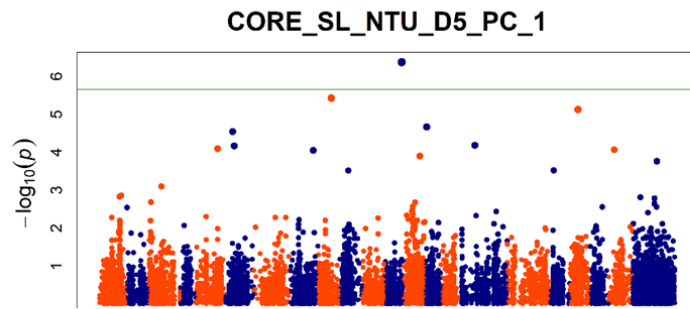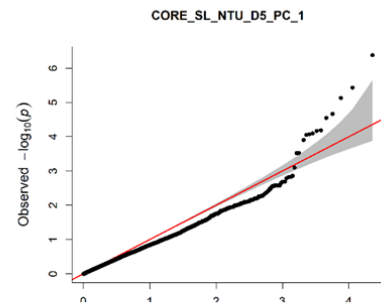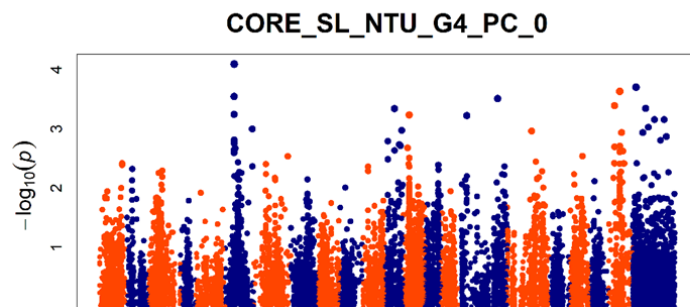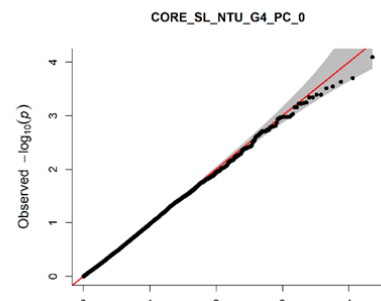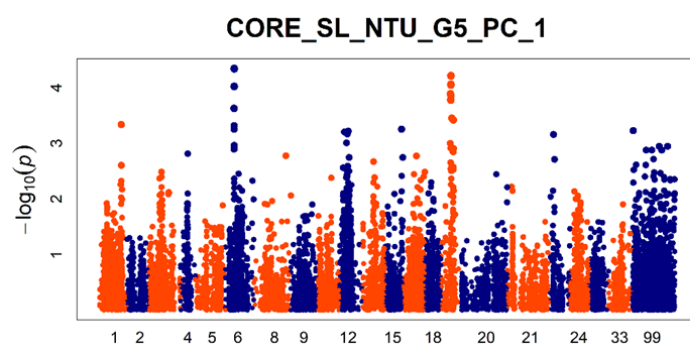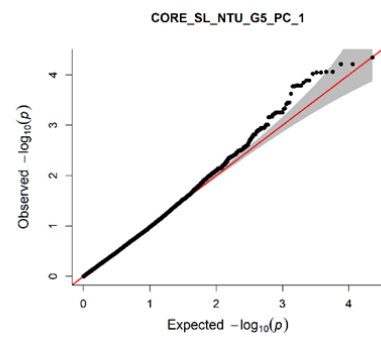

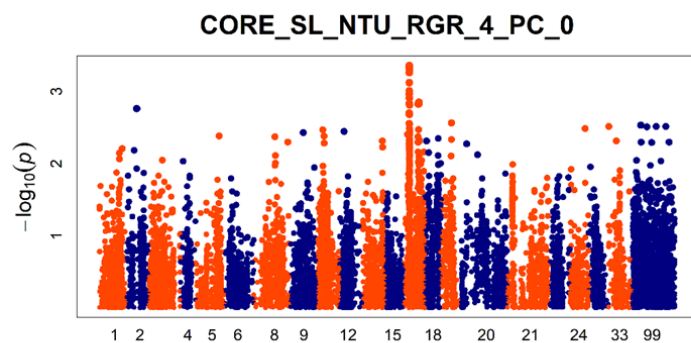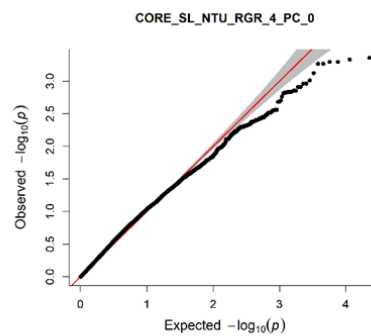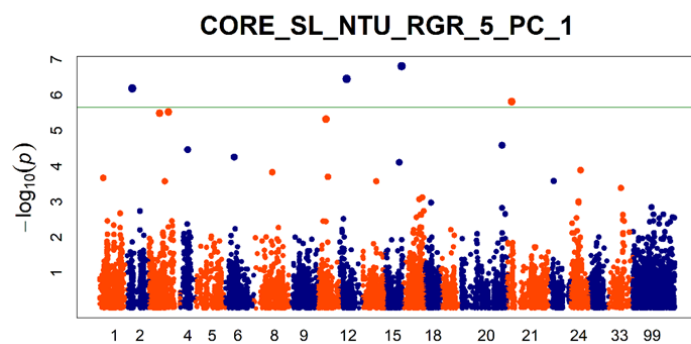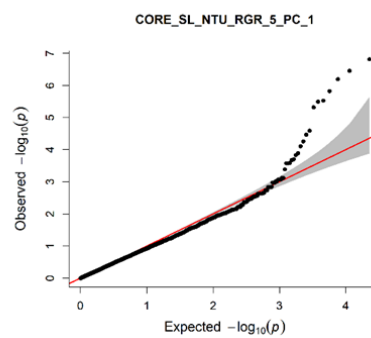

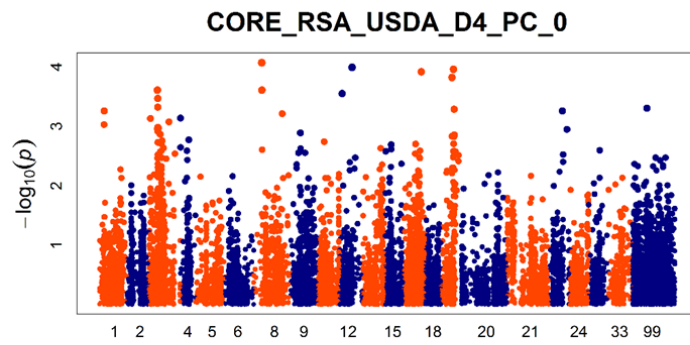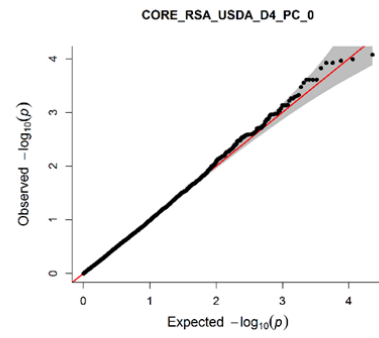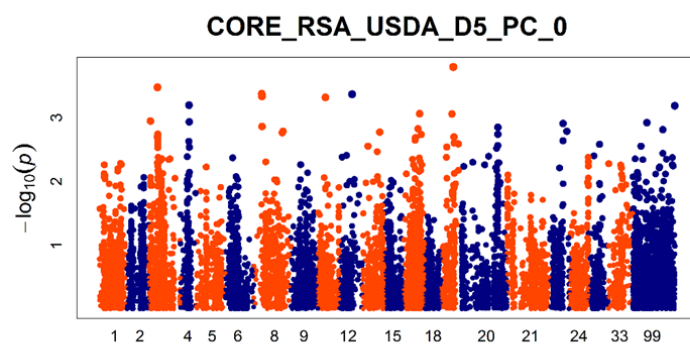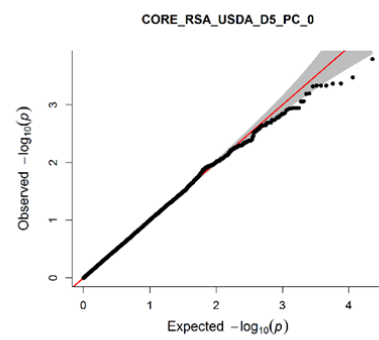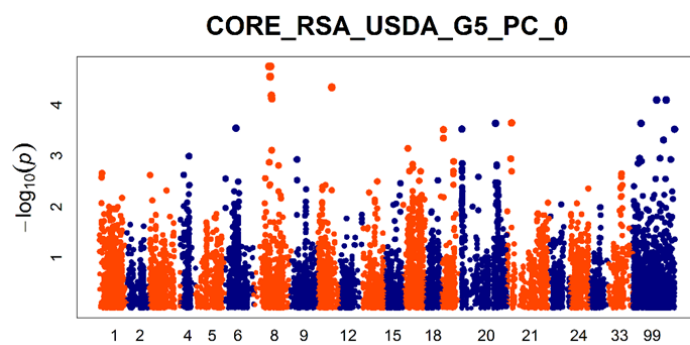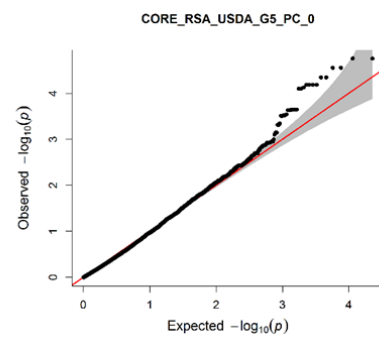

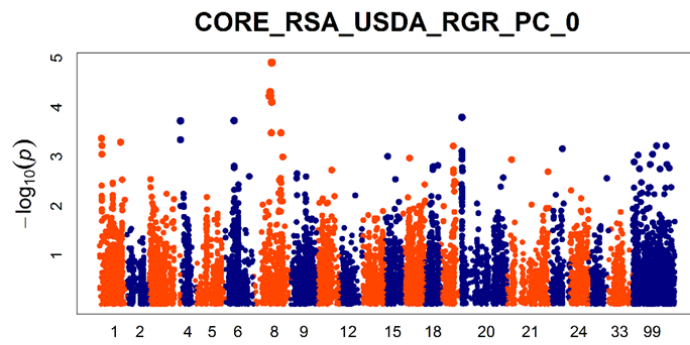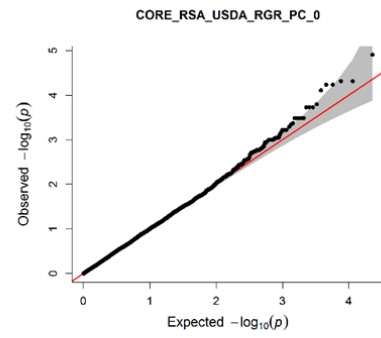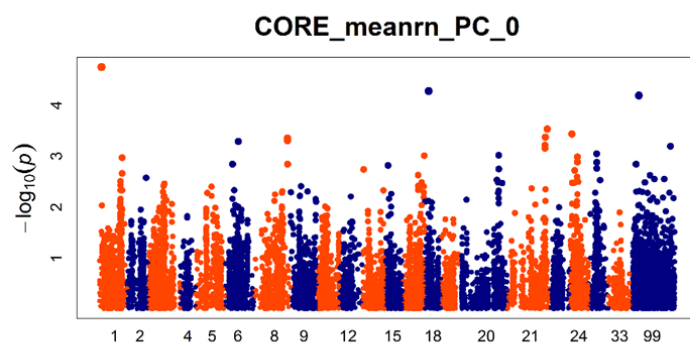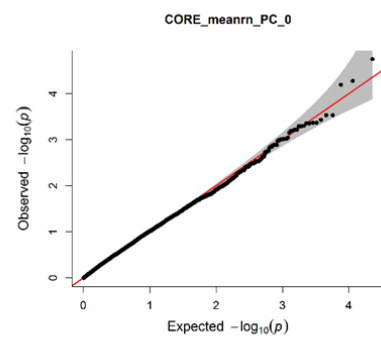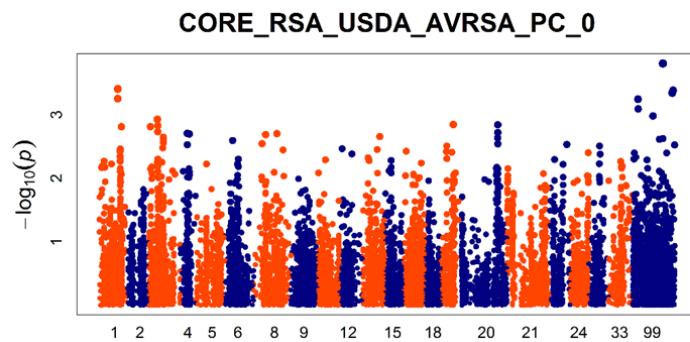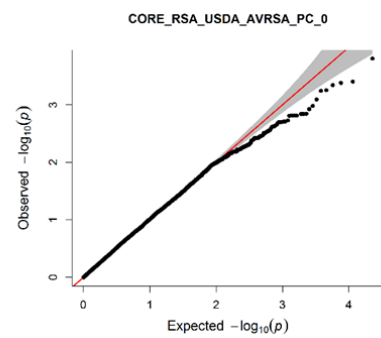

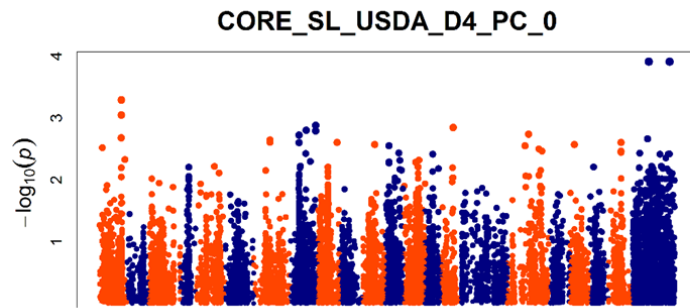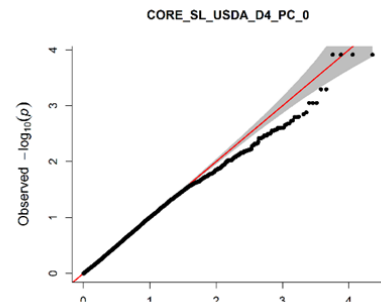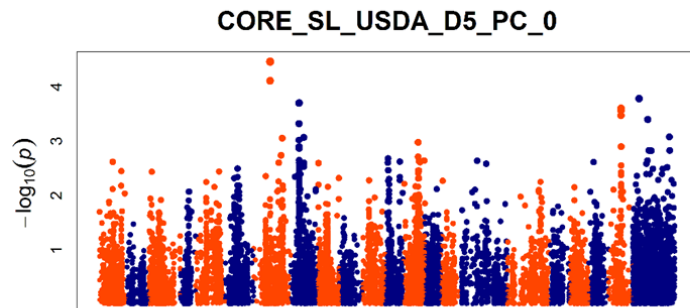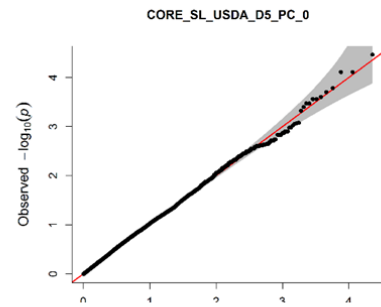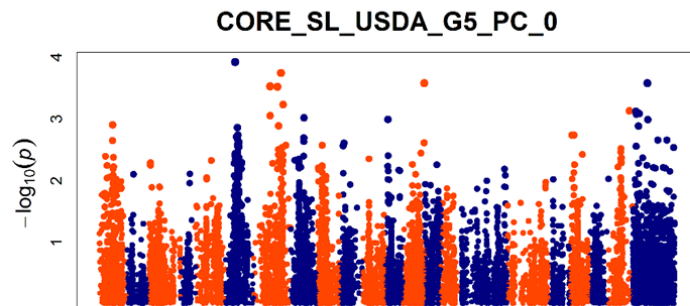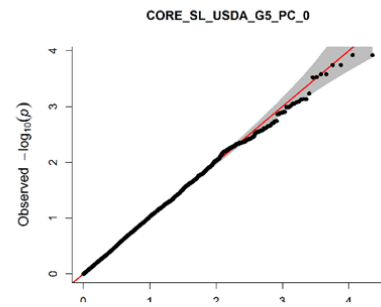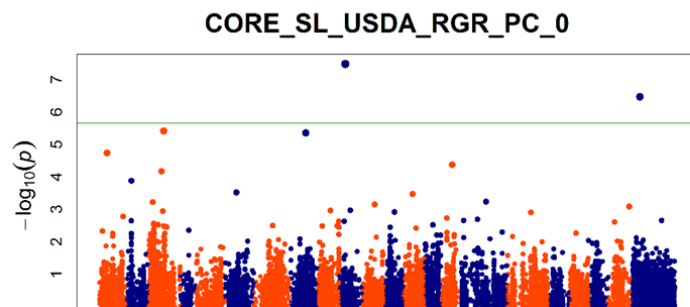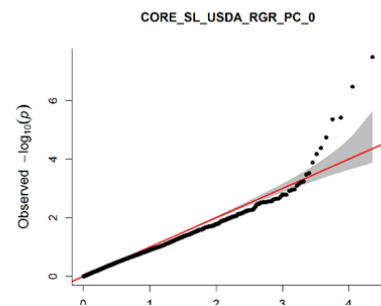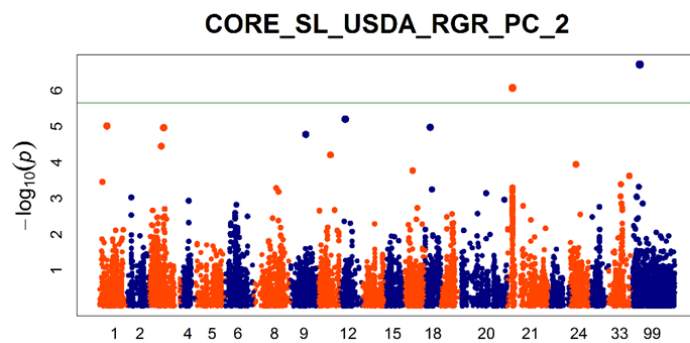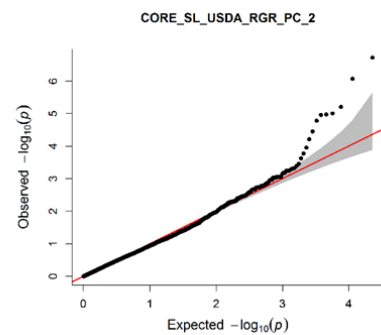

Supplement: Supplementary file 4 [file 1]
