# Supplementary material
Source: publisher figshare collection journal article supplement (https://gsajournals.figshare.com/articles/dataset/_/12721535)
Supplement: Supplementary file 1 [file 1]

# Experimental design

- Augmented design

## Replicate 1 in Taipei

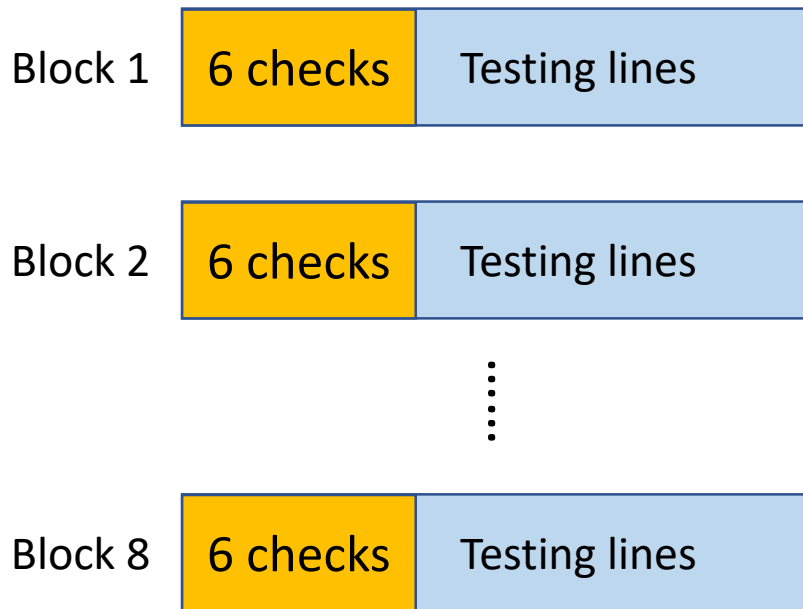

(sample size varying from 118 to 156)

## Replicate 2 in Aberdeen

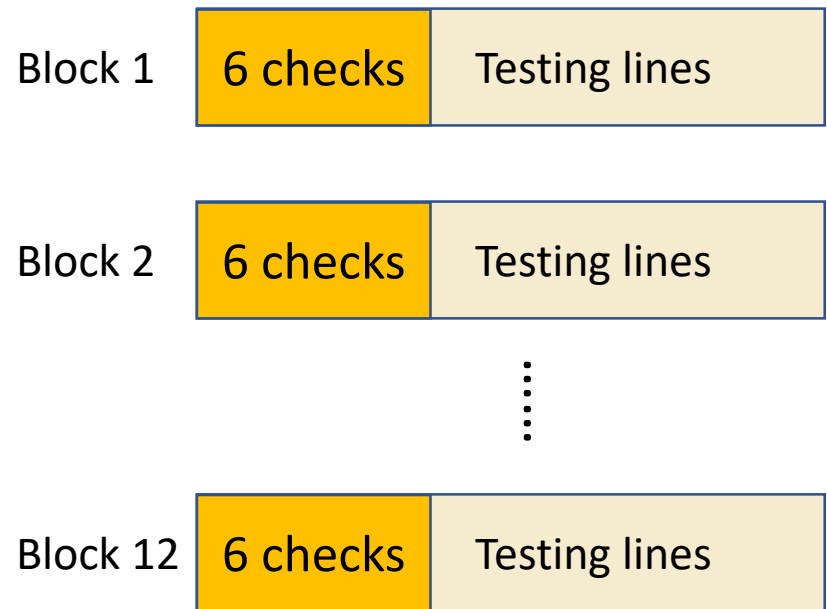

(sample size varying from 48 to 144)

Figure S1

## Illustration of average growth at Day 5

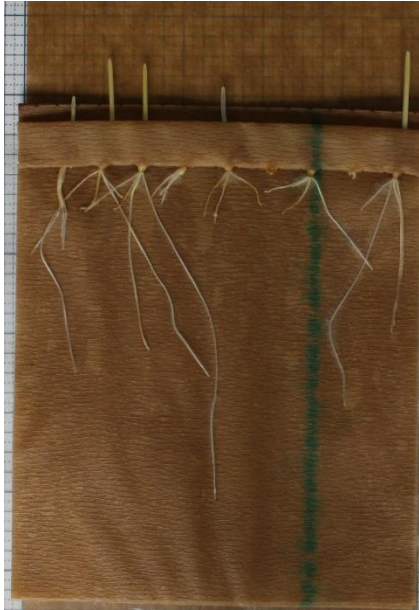

X9503-1

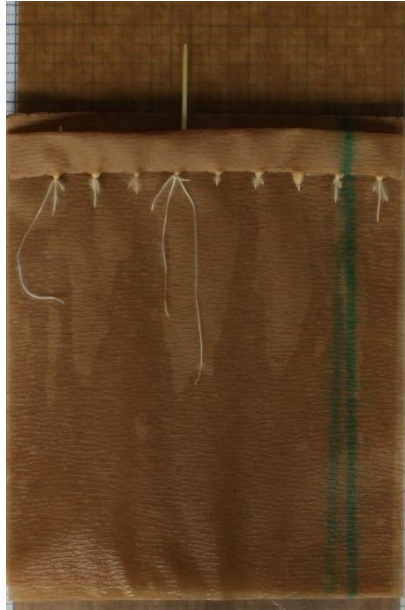

HA05AB9-32

Replicate done in Aberdeen

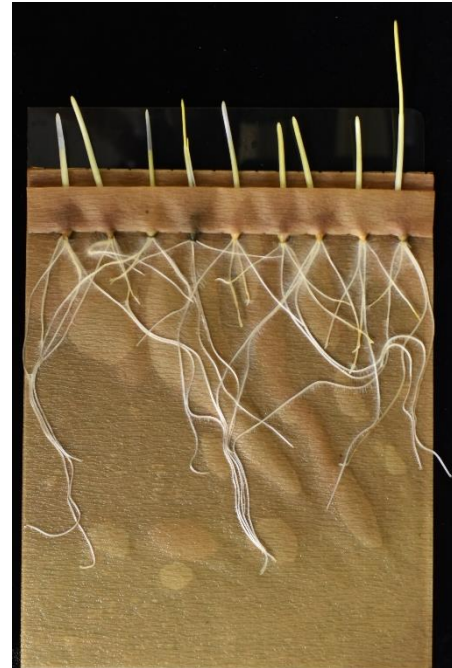

X9503-1

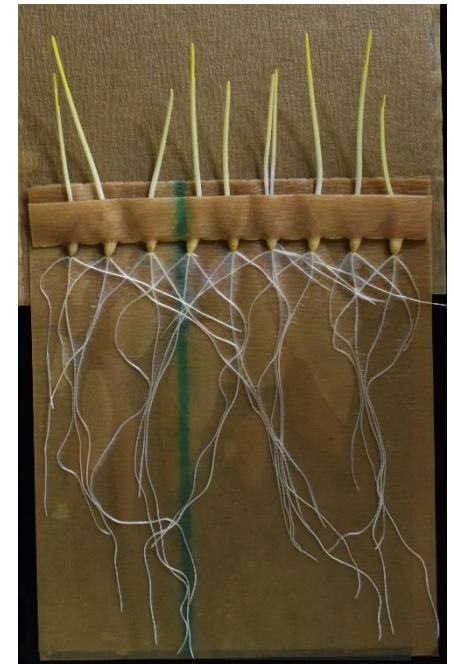

HA05AB9-32

Replicate done in Taipei

Figure S2

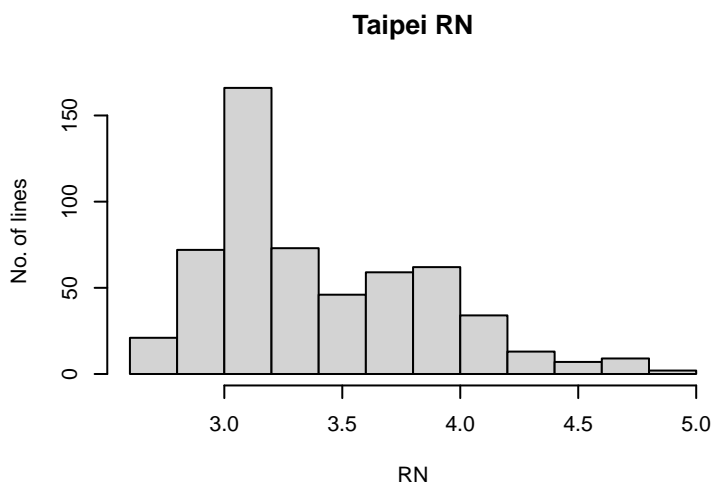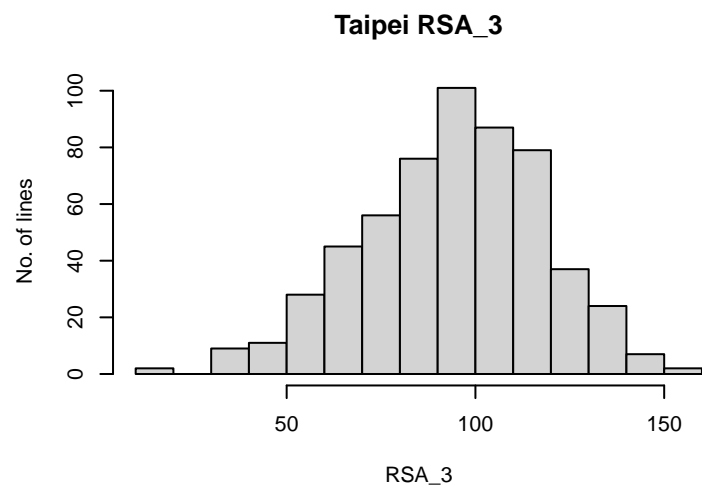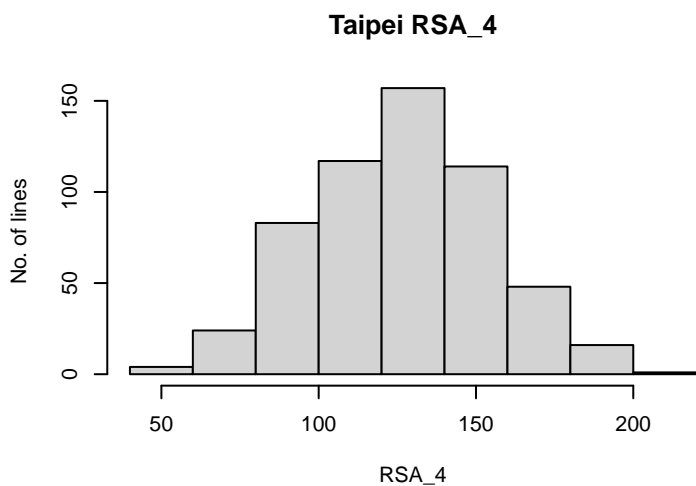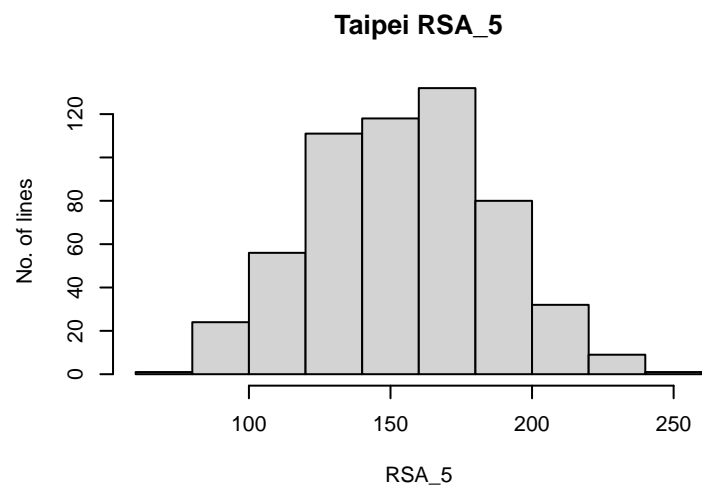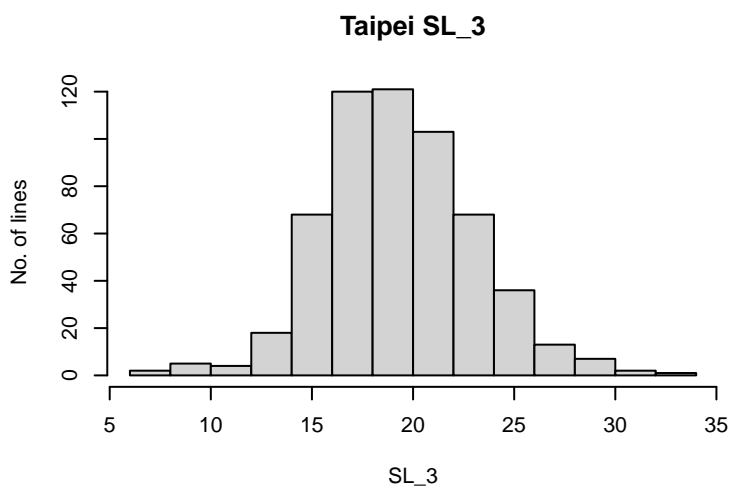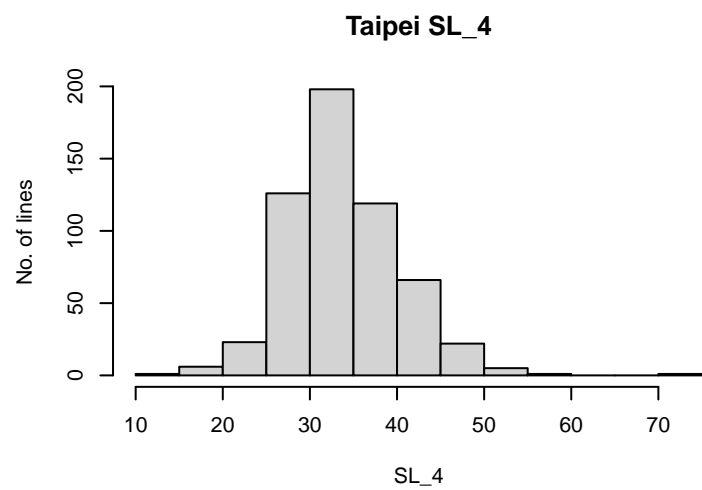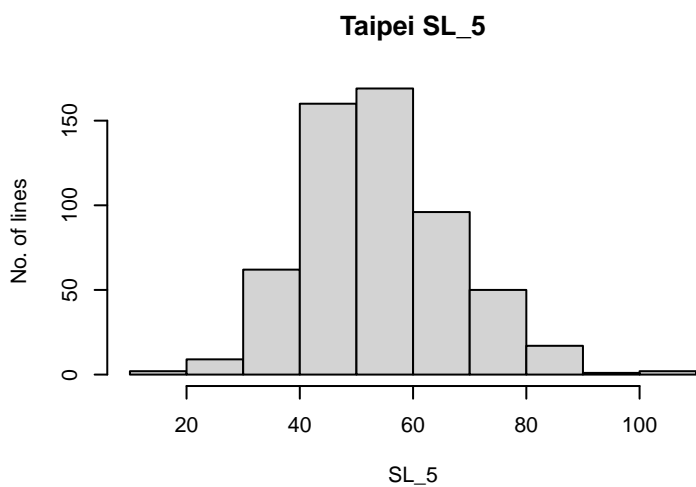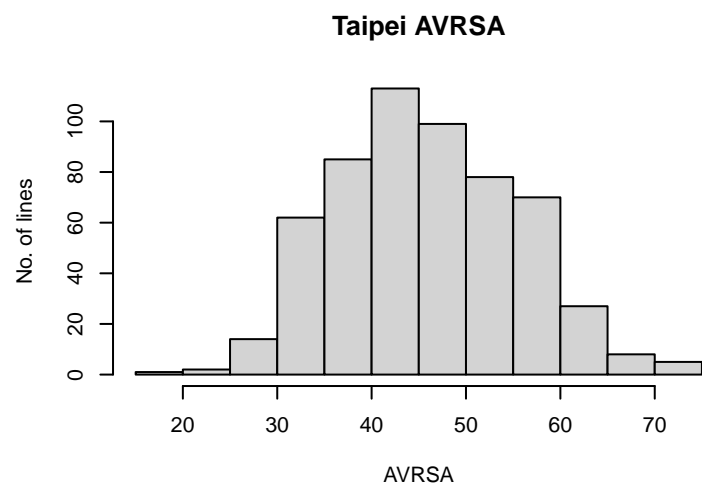

Figure S3: Trait distribution (continue)

**Taipei RG\_4**

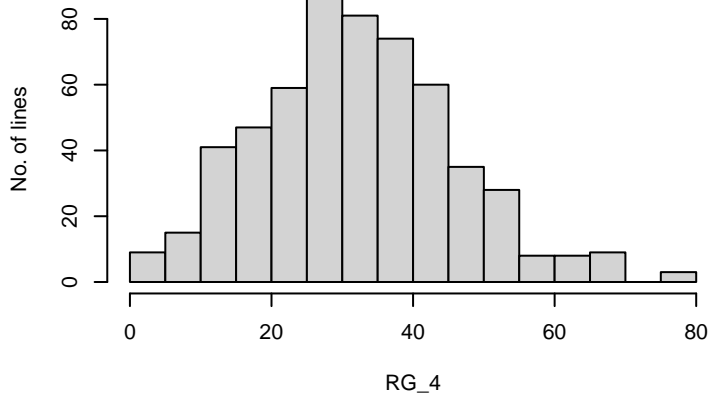

**Taipei RG\_5**

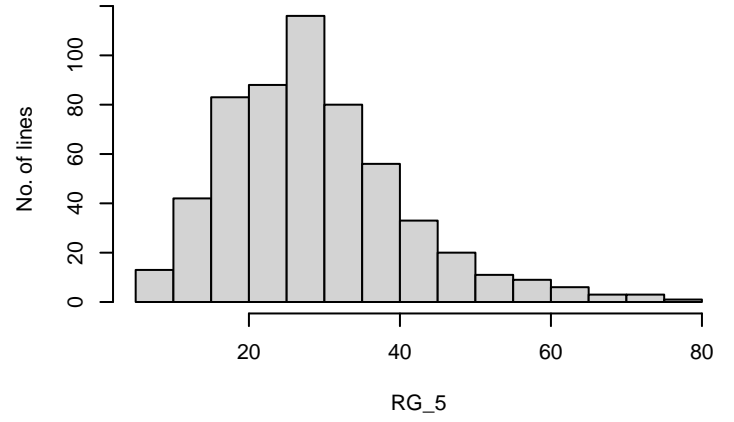

**Taipei RRGR\_4**

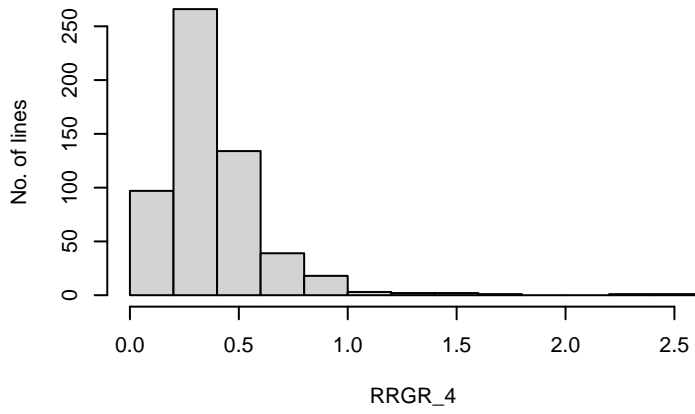

**Taipei RRGR\_5**

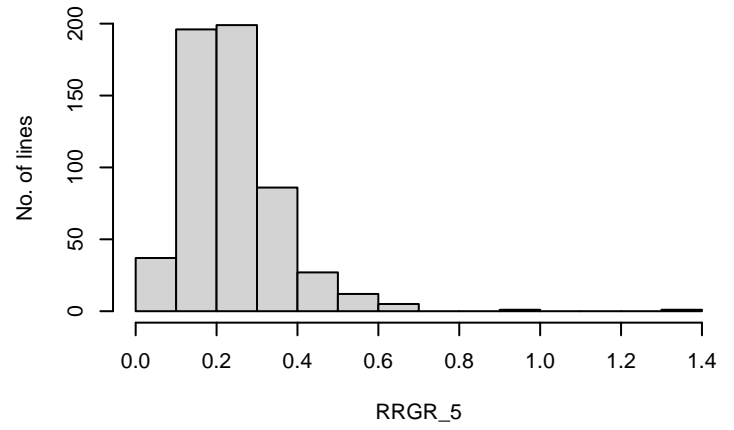

**Taipei SG\_4**

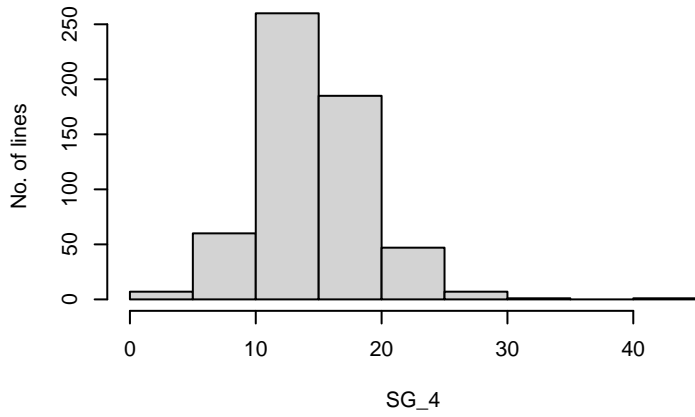

**Taipei SG\_5**

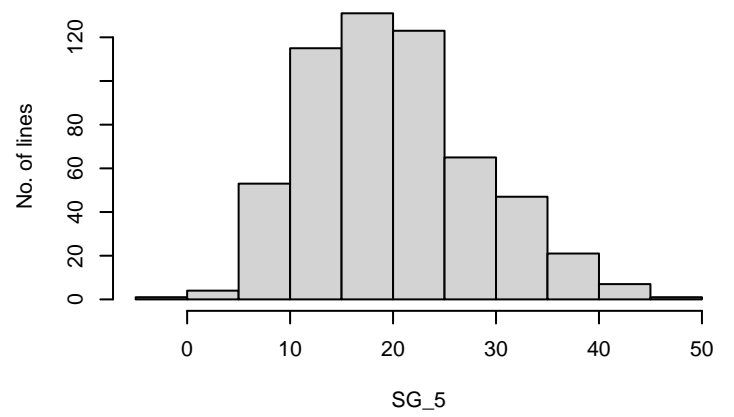

**Taipei SRGR\_4**

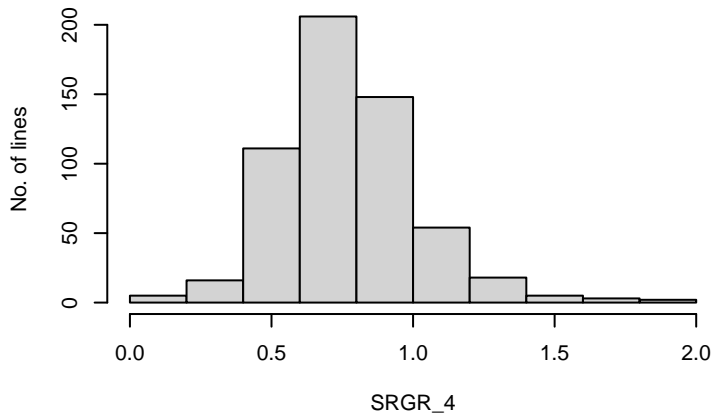

**Taipei SRGR\_5**

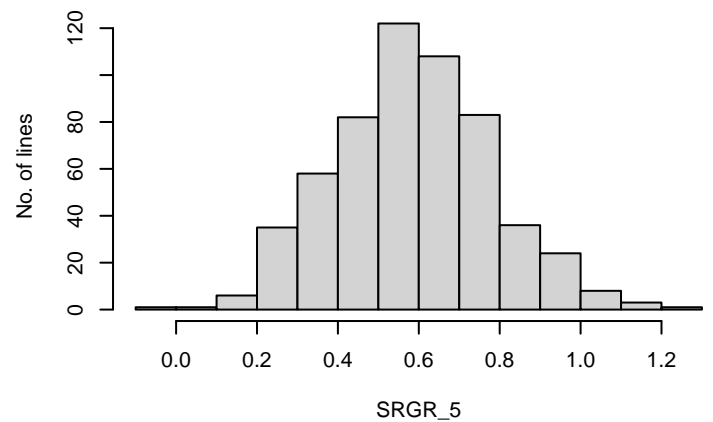

Figure S3: Trait distribution (continue)

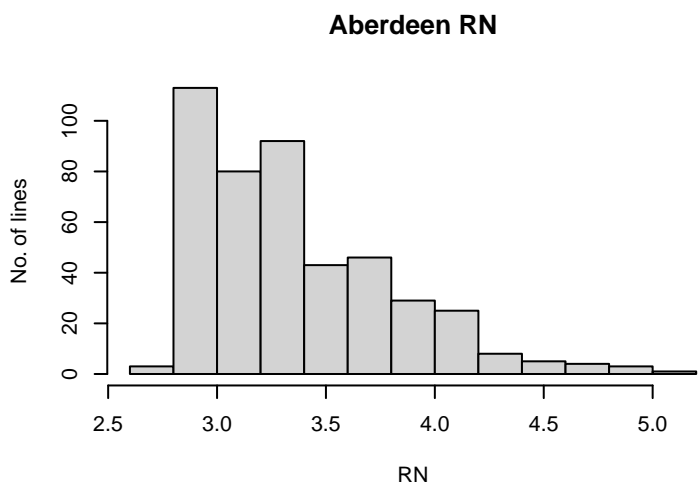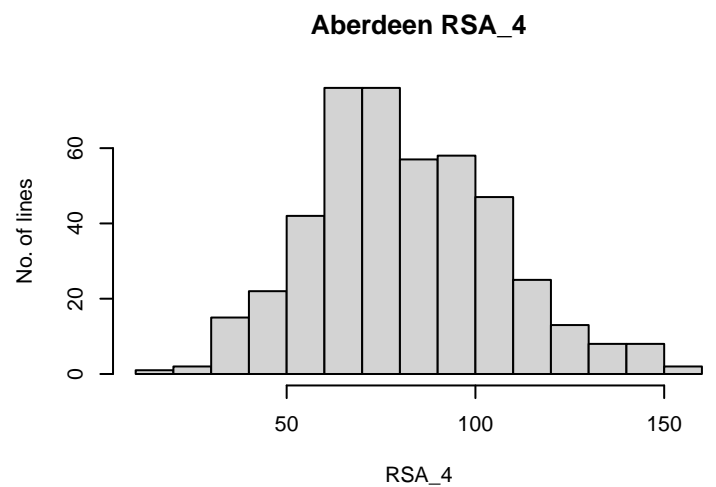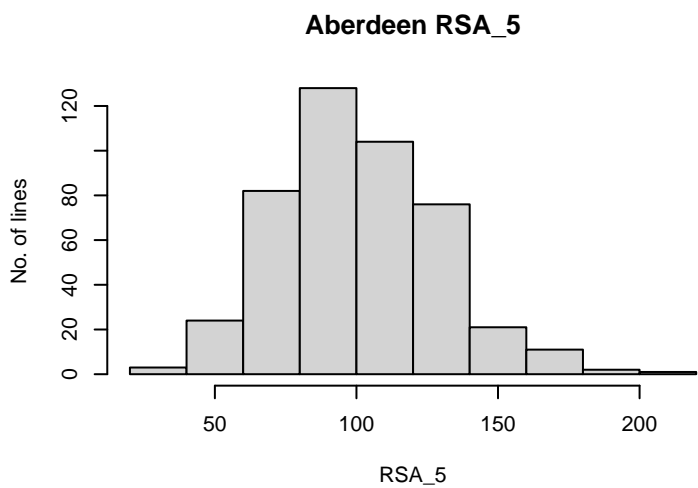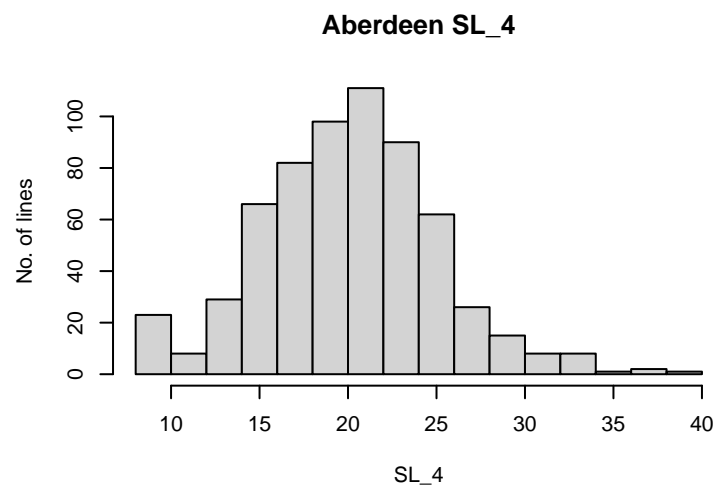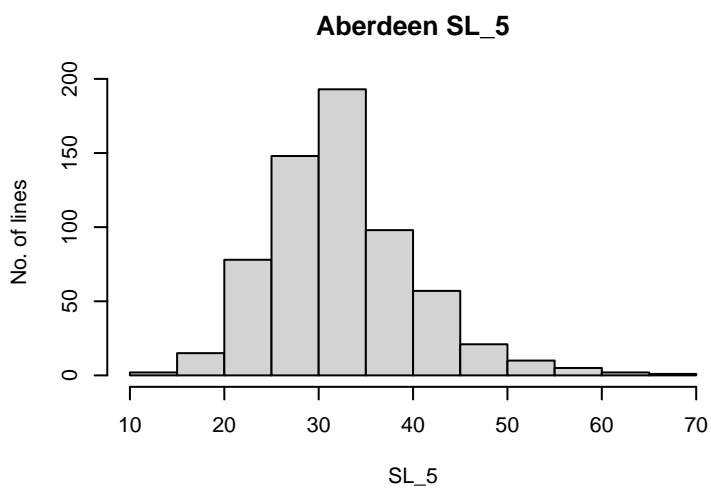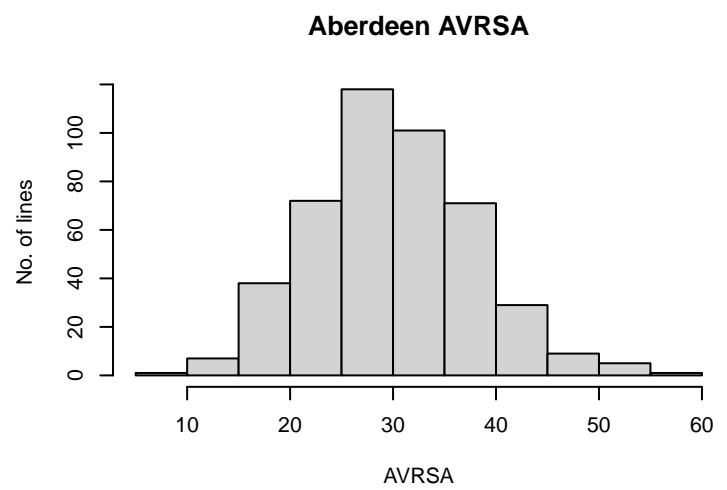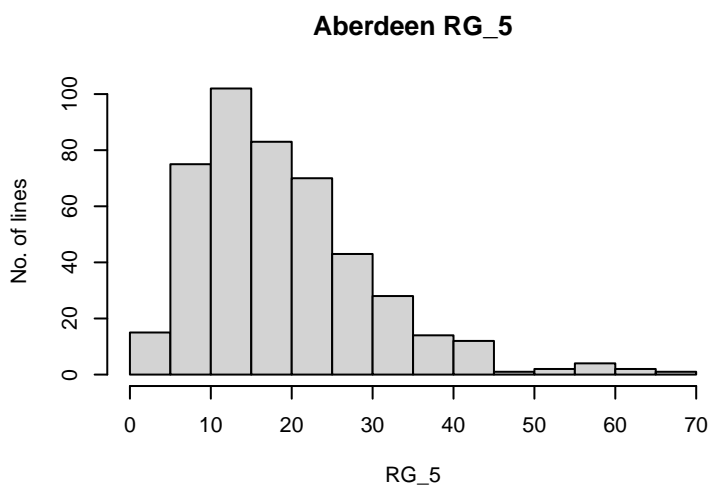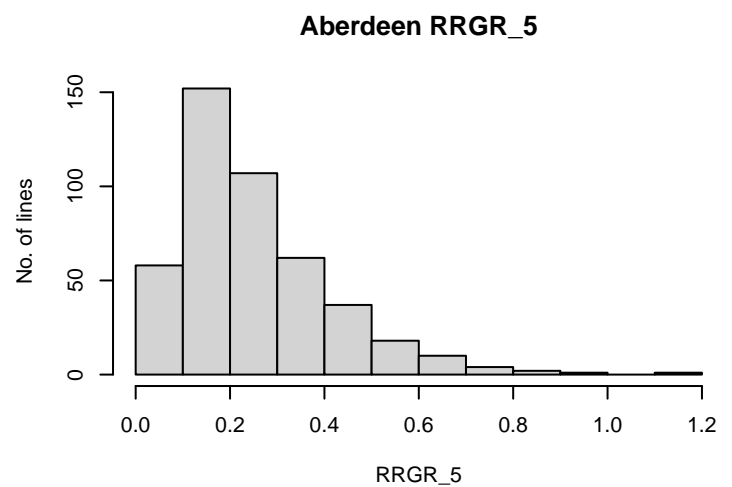

Figure S3: Trait distribution (continue)

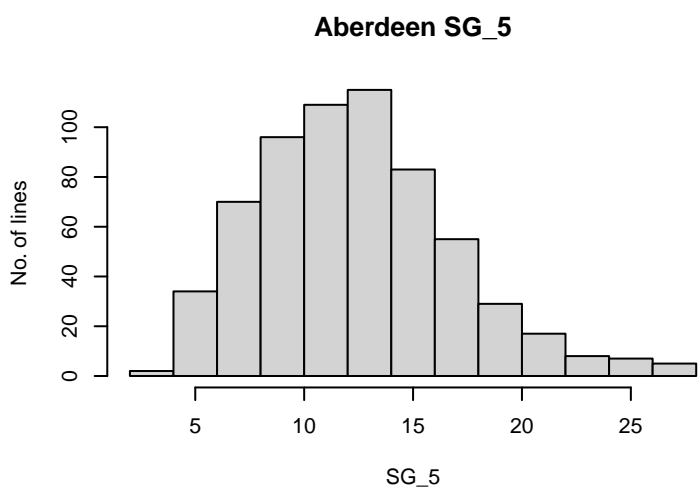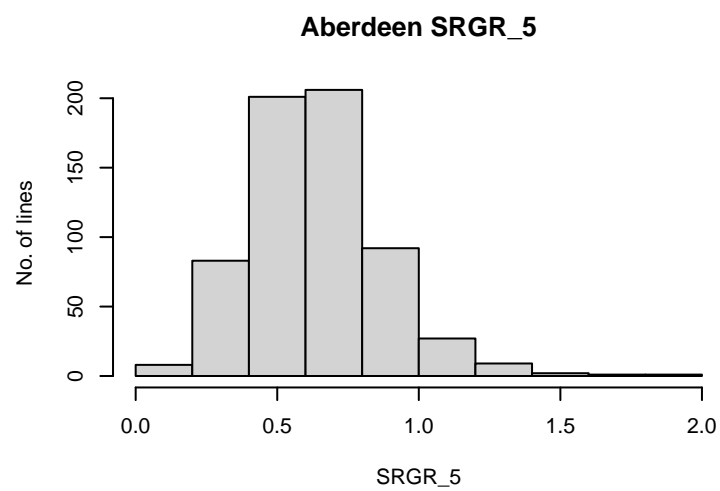

Figure S3: Trait distribution

## Correlation between traits (Taipei vs. Aberdeen)

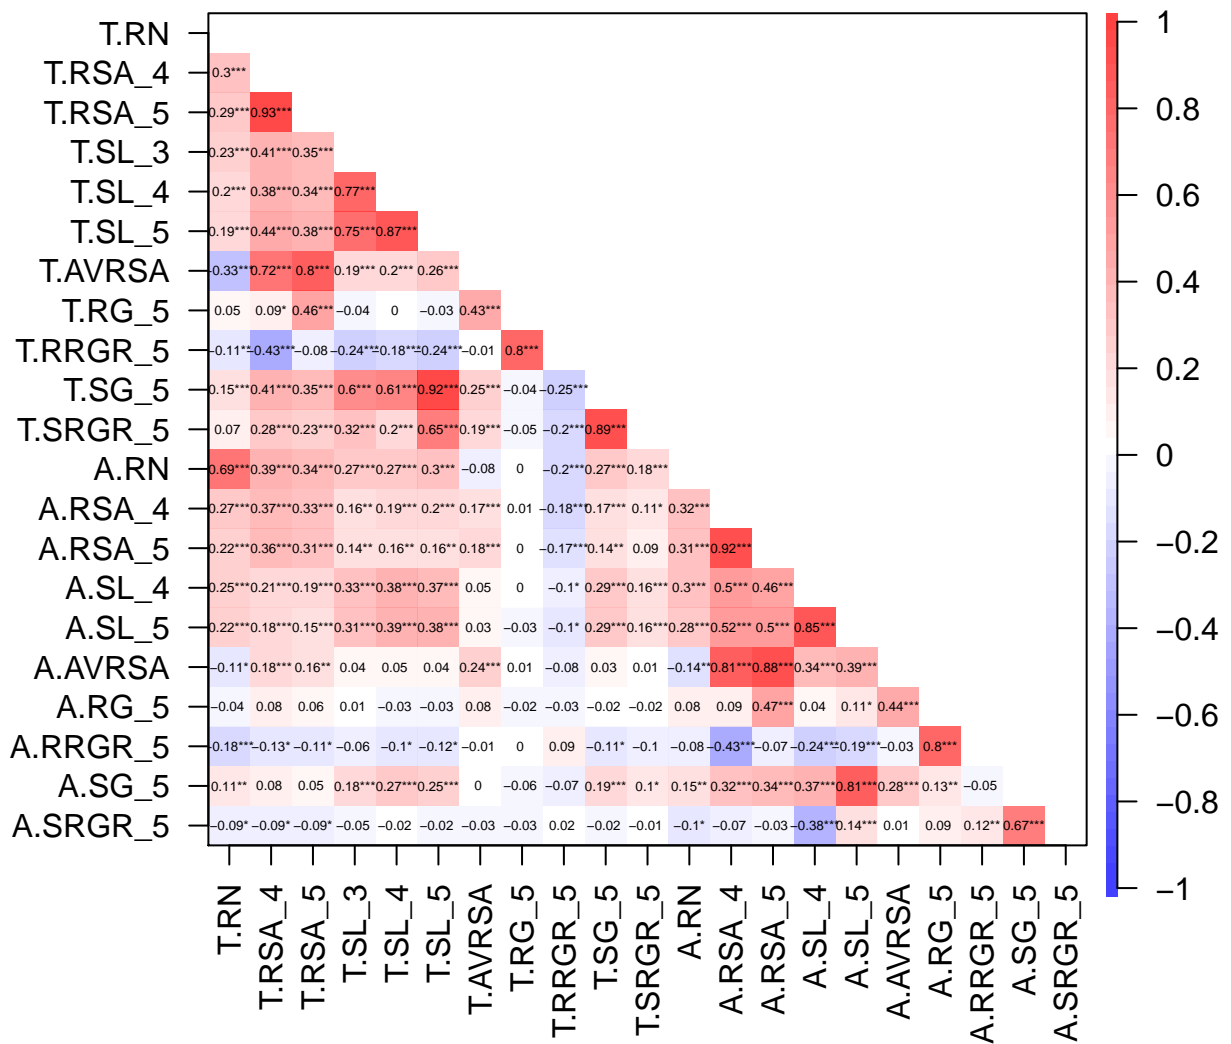

Figure S4: Correlation between traits (Taipei vs. Aberdeen)

Correlation between traits (Taipei)

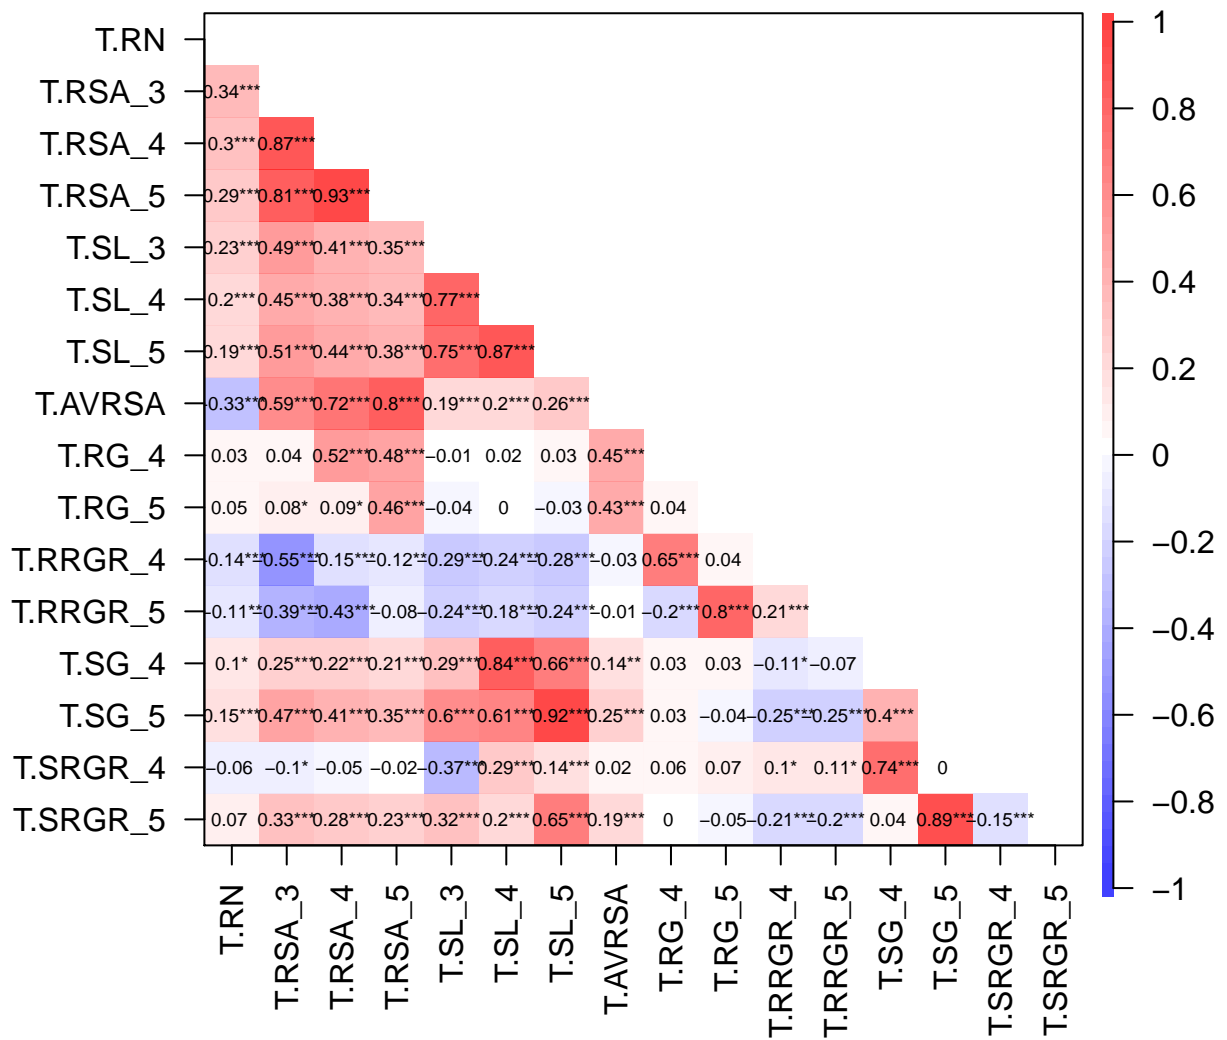

Figure S5: Correlation between traits (Taipei)



Correlation between traits (Aberdeen)

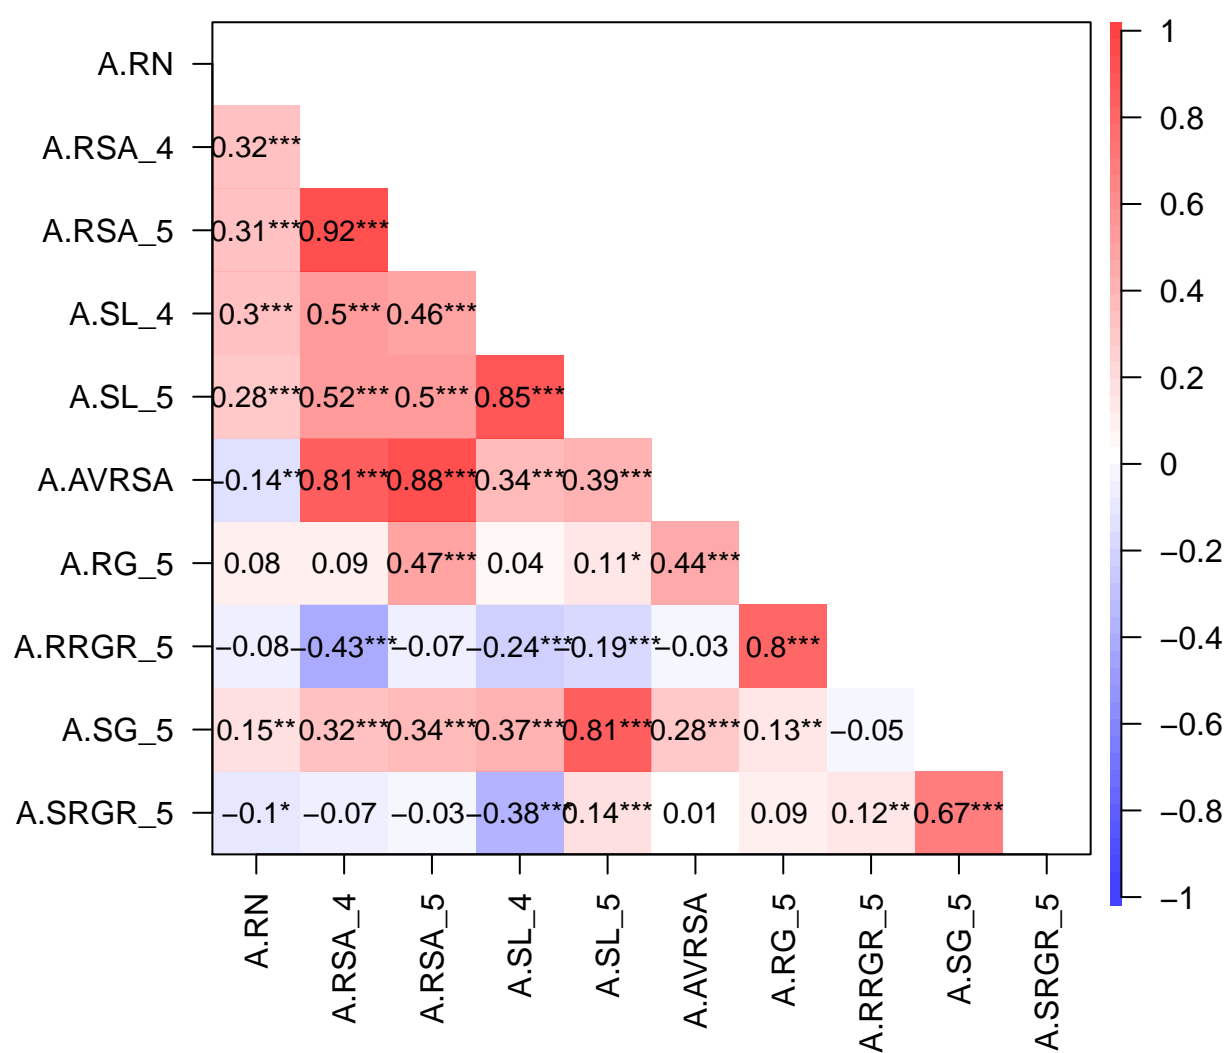

Figure S6: Correlation between traits (Aberdeen)
