# Supplementary material
Source: publisher figshare collection journal article supplement (https://gsajournals.figshare.com/articles/dataset/_/12721535)
Supplement: Supplementary file 2 [file 1]

# Supplementary tables

## *RN in Taipei*

### Details

| Item                       | Details                                              |
|----------------------------|------------------------------------------------------|
| Number of blocks           | 8                                                    |
| Number of treatments       | 637                                                  |
| Number of check treatments | 6                                                    |
| Number of test treatments  | 631                                                  |
| Check treatments           | TW_0001, TW_0003, TW_0005, TW_0007, TW_0009, TW_0011 |

### ANOVA, Treatment Adjusted

| Source                             | Df  | Sum Sq | Mean Sq | F value | Pr(>F)  |
|------------------------------------|-----|--------|---------|---------|---------|
| Block (ignoring Treatments)        | 7   | 15.51  | 2.22    | 89.3    | 2e-20   |
| Treatment (eliminating Blocks)     | 636 | 116.82 | 0.18    | 7.4     | 3.5e-10 |
| Treatment: Check                   | 5   | 2.38   | 0.48    | 19.21   | 3.6e-09 |
| Treatment: Test and Test vs. Check | 631 | 114.44 | 0.18    | 7.31    | 4.2e-10 |
| Residuals                          | 35  | 0.87   | 0.02    |         |         |

### ANOVA, Block Adjusted

| Source                         | Df  | Sum Sq | Mean Sq | F value | Pr(>F)  |
|--------------------------------|-----|--------|---------|---------|---------|
| Treatment (ignoring Blocks)    | 636 | 131.76 | 0.21    | 8.35    | 5.5e-11 |
| Treatment: Check               | 5   | 2.38   | 0.48    | 19.21   | 3.6e-09 |
| Treatment: Test                | 630 | 128.3  | 0.2     | 8.21    | 7.2e-11 |
| Treatment: Test vs. Check      | 1   | 1.07   | 1.07    | 43.18   | 1.4e-07 |
| Block (eliminating Treatments) | 7   | 0.58   | 0.08    | 3.32    | 0.01    |
| Residuals                      | 35  | 0.87   | 0.02    |         |         |

## RSA\_3 in Taipei

### Details

| Item                       | Details                                              |
|----------------------------|------------------------------------------------------|
| Number of blocks           | 8                                                    |
| Number of treatments       | 637                                                  |
| Number of check treatments | 6                                                    |
| Number of test treatments  | 631                                                  |
| Check treatments           | TW_0001, TW_0003, TW_0005, TW_0007, TW_0009, TW_0011 |

### ANOVA, Treatment Adjusted

| Source                             | Df  | Sum Sq    | Mean Sq | F value | Pr(>F)  |
|------------------------------------|-----|-----------|---------|---------|---------|
| Block (ignoring Treatments)        | 7   | 303843.38 | 43406.2 | 124.64  | 8.1e-23 |
| Treatment (eliminating Blocks)     | 636 | 270704.11 | 425.64  | 1.22    | 0.24    |
| Treatment: Check                   | 5   | 6840.59   | 1368.12 | 3.93    | 0.01    |
| Treatment: Test and Test vs. Check | 631 | 263863.51 | 418.17  | 1.2     | 0.26    |
| Residuals                          | 35  | 12189.12  | 348.26  |         |         |

### ANOVA, Block Adjusted

| Source                         | Df  | Sum Sq    | Mean Sq  | F value | Pr(>F)  |
|--------------------------------|-----|-----------|----------|---------|---------|
| Treatment (ignoring Blocks)    | 636 | 548517.21 | 862.45   | 2.48    | 0.00077 |
| Treatment: Check               | 5   | 6840.59   | 1368.12  | 3.93    | 0.01    |
| Treatment: Test                | 630 | 518886.47 | 823.63   | 2.36    | 0.0013  |
| Treatment: Test vs. Check      | 1   | 22790.15  | 22790.15 | 65.44   | 1.6e-09 |
| Block (eliminating Treatments) | 7   | 26030.28  | 3718.61  | 10.68   | 4.1e-07 |
| Residuals                      | 35  | 12189.12  | 348.26   |         |         |

Test: unique genotype. In this study, test corresponds to individuals from the CORE panel.

## RSA\_4 in Taipei

### Details

| Item                       | Details                                              |
|----------------------------|------------------------------------------------------|
| Number of blocks           | 8                                                    |
| Number of treatments       | 637                                                  |
| Number of check treatments | 6                                                    |
| Number of test treatments  | 631                                                  |
| Check treatments           | TW_0001, TW_0003, TW_0005, TW_0007, TW_0009, TW_0011 |

### ANOVA, Treatment Adjusted

| Source                             | Df  | Sum Sq    | Mean Sq  | F value | Pr(>F)  |
|------------------------------------|-----|-----------|----------|---------|---------|
| Block (ignoring Treatments)        | 7   | 519377.07 | 74196.72 | 160.01  | 1.2e-24 |
| Treatment (eliminating Blocks)     | 636 | 409888.04 | 644.48   | 1.39    | 0.11    |
| Treatment: Check                   | 5   | 11849.72  | 2369.94  | 5.11    | 0.0013  |
| Treatment: Test and Test vs. Check | 631 | 398038.32 | 630.81   | 1.36    | 0.13    |
| Residuals                          | 35  | 16229.03  | 463.69   |         |         |

### ANOVA, Block Adjusted

| Source                         | Df  | Sum Sq    | Mean Sq  | F value | Pr(>F)  |
|--------------------------------|-----|-----------|----------|---------|---------|
| Treatment (ignoring Blocks)    | 636 | 906081.51 | 1424.66  | 3.07    | 6.6e-05 |
| Treatment: Check               | 5   | 11849.72  | 2369.94  | 5.11    | 0.0013  |
| Treatment: Test                | 630 | 869247.33 | 1379.76  | 2.98    | 9.6e-05 |
| Treatment: Test vs. Check      | 1   | 24984.45  | 24984.45 | 53.88   | 1.4e-08 |
| Block (eliminating Treatments) | 7   | 23183.6   | 3311.94  | 7.14    | 2.6e-05 |
| Residuals                      | 35  | 16229.03  | 463.69   |         |         |

## RSA\_5 in Taipei

### Details

| Item                       | Details                                              |
|----------------------------|------------------------------------------------------|
| Number of blocks           | 8                                                    |
| Number of treatments       | 637                                                  |
| Number of check treatments | 6                                                    |
| Number of test treatments  | 631                                                  |
| Check treatments           | TW_0001, TW_0003, TW_0005, TW_0007, TW_0009, TW_0011 |

### ANOVA, Treatment Adjusted

| Source                             | Df  | Sum Sq    | Mean Sq  | F value | Pr(>F)  |
|------------------------------------|-----|-----------|----------|---------|---------|
| Block (ignoring Treatments)        | 7   | 384881.45 | 54983.06 | 84.06   | 5.5e-20 |
| Treatment (eliminating Blocks)     | 636 | 555871.56 | 874.01   | 1.34    | 0.15    |
| Treatment: Check                   | 5   | 21089.17  | 4217.83  | 6.45    | 0.00024 |
| Treatment: Test and Test vs. Check | 631 | 534782.39 | 847.52   | 1.3     | 0.17    |
| Residuals                          | 35  | 22893.13  | 654.09   |         |         |

### ANOVA, Block Adjusted

| Source                         | Df  | Sum Sq    | Mean Sq | F value | Pr(>F)  |
|--------------------------------|-----|-----------|---------|---------|---------|
| Treatment (ignoring Blocks)    | 636 | 917478.73 | 1442.58 | 2.21    | 0.0026  |
| Treatment: Check               | 5   | 21089.17  | 4217.83 | 6.45    | 0.00024 |
| Treatment: Test                | 630 | 870271.26 | 1381.38 | 2.11    | 0.004   |
| Treatment: Test vs. Check      | 1   | 26118.3   | 26118.3 | 39.93   | 2.9e-07 |
| Block (eliminating Treatments) | 7   | 23274.28  | 3324.9  | 5.08    | 0.00047 |
| Residuals                      | 35  | 22893.13  | 654.09  |         |         |

## AVRSA in Taipei

### Details

| Item                       | Details                                              |
|----------------------------|------------------------------------------------------|
| Number of blocks           | 8                                                    |
| Number of treatments       | 637                                                  |
| Number of check treatments | 6                                                    |
| Number of test treatments  | 631                                                  |
| Check treatments           | TW_0001, TW_0003, TW_0005, TW_0007, TW_0009, TW_0011 |

### ANOVA, Treatment Adjusted

| Source                             | Df  | Sum Sq   | Mean Sq | F value | Pr(>F)  |
|------------------------------------|-----|----------|---------|---------|---------|
| Block (ignoring Treatments)        | 7   | 32322.35 | 4617.48 | 76.04   | 2.8e-19 |
| Treatment (eliminating Blocks)     | 636 | 52256.63 | 82.16   | 1.35    | 0.14    |
| Treatment: Check                   | 5   | 2159.01  | 431.8   | 7.11    | 0.00011 |
| Treatment: Test and Test vs. Check | 631 | 50097.62 | 79.39   | 1.31    | 0.17    |
| Residuals                          | 35  | 2125.38  | 60.73   |         |         |

### ANOVA, Block Adjusted

| Source                         | Df  | Sum Sq   | Mean Sq | F value | Pr(>F)  |
|--------------------------------|-----|----------|---------|---------|---------|
| Treatment (ignoring Blocks)    | 636 | 82380.06 | 129.53  | 2.13    | 0.0036  |
| Treatment: Check               | 5   | 2159.01  | 431.8   | 7.11    | 0.00011 |
| Treatment: Test                | 630 | 78862.79 | 125.18  | 2.06    | 0.005   |
| Treatment: Test vs. Check      | 1   | 1358.27  | 1358.27 | 22.37   | 3.6e-05 |
| Block (eliminating Treatments) | 7   | 2198.91  | 314.13  | 5.17    | 0.00041 |
| Residuals                      | 35  | 2125.38  | 60.73   |         |         |

## RG\_4 in Taipei

### Details

| Item                       | Details                                              |
|----------------------------|------------------------------------------------------|
| Number of blocks           | 8                                                    |
| Number of treatments       | 637                                                  |
| Number of check treatments | 6                                                    |
| Number of test treatments  | 631                                                  |
| Check treatments           | TW_0001, TW_0003, TW_0005, TW_0007, TW_0009, TW_0011 |

### ANOVA, Treatment Adjusted

| Source                             | Df  | Sum Sq    | Mean Sq | F value | Pr(>F)   |
|------------------------------------|-----|-----------|---------|---------|----------|
| Block (ignoring Treatments)        | 7   | 58173.99  | 8310.57 | 55.83   | 4.08E-17 |
| Treatment (eliminating Blocks)     | 636 | 121522.47 | 191.07  | 1.28    | 0.18     |
| Treatment: Check                   | 5   | 2060.64   | 412.13  | 2.77    | 0.03     |
| Treatment: Test and Test vs. Check | 631 | 119461.82 | 189.32  | 1.27    | 0.19     |
| Residuals                          | 35  | 5209.74   | 148.85  |         |          |

### ANOVA, Block Adjusted

| Source                         | Df  | Sum Sq    | Mean Sq | F value | Pr(>F) |
|--------------------------------|-----|-----------|---------|---------|--------|
| Treatment (ignoring Blocks)    | 636 | 177317.52 | 278.80  | 1.87    | 0.0120 |
| Treatment: Check               | 5   | 2060.64   | 412.13  | 2.77    | 0.0329 |
| Treatment: Test                | 630 | 175206.46 | 278.11  | 1.87    | 0.0123 |
| Treatment: Test vs. Check      | 1   | 50.42     | 50.42   | 0.34    | 0.5643 |
| Block (eliminating Treatments) | 7   | 2378.94   | 339.85  | 2.28    | 0.0502 |
| Residuals                      | 35  | 5209.74   | 148.85  |         |        |

## RG\_5 in Taipei

### Details

| Item                       | Details                                              |
|----------------------------|------------------------------------------------------|
| Number of blocks           | 8                                                    |
| Number of treatments       | 637                                                  |
| Number of check treatments | 6                                                    |
| Number of test treatments  | 631                                                  |
| Check treatments           | TW_0001, TW_0003, TW_0005, TW_0007, TW_0009, TW_0011 |

### ANOVA, Treatment Adjusted

| Source                             | Df  | Sum Sq    | Mean Sq | F value | Pr(>F)   |
|------------------------------------|-----|-----------|---------|---------|----------|
| Block (ignoring Treatments)        | 7   | 45632.39  | 6518.91 | 22.92   | 2.61E-11 |
| Treatment (eliminating Blocks)     | 636 | 128013.60 | 201.28  | 0.71    | 0.94     |
| Treatment: Check                   | 5   | 2260.40   | 452.08  | 1.59    | 0.19     |
| Treatment: Test and Test vs. Check | 631 | 125753.19 | 199.29  | 0.70    | 0.95     |
| Residuals                          | 35  | 9954.68   | 284.42  |         |          |

### ANOVA, Block Adjusted

| Source                         | Df  | Sum Sq    | Mean Sq | F value | Pr(>F) |
|--------------------------------|-----|-----------|---------|---------|--------|
| Treatment (ignoring Blocks)    | 636 | 168219.62 | 264.50  | 0.93    | 0.64   |
| Treatment: Check               | 5   | 2260.40   | 452.08  | 1.59    | 0.19   |
| Treatment: Test                | 630 | 165946.63 | 263.41  | 0.93    | 0.65   |
| Treatment: Test vs. Check      | 1   | 12.58     | 12.58   | 0.04    | 0.83   |
| Block (eliminating Treatments) | 7   | 5426.37   | 775.20  | 2.73    | 0.02   |
| Residuals                      | 35  | 9954.68   | 284.42  |         |        |

## RRGR\_4 in Taipei

### Details

| Item                       | Details                                              |
|----------------------------|------------------------------------------------------|
| Number of blocks           | 8                                                    |
| Number of treatments       | 637                                                  |
| Number of check treatments | 6                                                    |
| Number of test treatments  | 631                                                  |
| Check treatments           | TW_0001, TW_0003, TW_0005, TW_0007, TW_0009, TW_0011 |

### ANOVA, Treatment Adjusted

| Source                             | Df  | Sum Sq | Mean Sq | F value | Pr(>F)   |
|------------------------------------|-----|--------|---------|---------|----------|
| Block (ignoring Treatments)        | 7   | 6.120  | 0.874   | 14.163  | 1.48E-08 |
| Treatment (eliminating Blocks)     | 636 | 17.344 | 0.027   | 0.442   | 1.000    |
| Treatment: Check                   | 5   | 0.463  | 0.093   | 1.501   | 0.215    |
| Treatment: Test and Test vs. Check | 631 | 16.880 | 0.027   | 0.433   | 1.000    |
| Residuals                          | 35  | 2.161  | 0.062   |         |          |

### ANOVA, Block Adjusted

| Source                         | Df  | Sum Sq | Mean Sq | F value | Pr(>F) |
|--------------------------------|-----|--------|---------|---------|--------|
| Treatment (ignoring Blocks)    | 636 | 21.83  | 0.034   | 0.556   | 0.996  |
| Treatment: Check               | 5   | 0.46   | 0.093   | 1.501   | 0.215  |
| Treatment: Test                | 630 | 20.48  | 0.033   | 0.527   | 0.998  |
| Treatment: Test vs. Check      | 1   | 0.88   | 0.879   | 14.247  | 0.001  |
| Block (eliminating Treatments) | 7   | 1.64   | 0.234   | 3.788   | 0.004  |
| Residuals                      | 35  | 2.16   | 0.062   |         |        |



## RRGR\_5 in Taipei

### Details

| Item                       | Details                                              |
|----------------------------|------------------------------------------------------|
| Number of blocks           | 8                                                    |
| Number of treatments       | 637                                                  |
| Number of check treatments | 6                                                    |
| Number of test treatments  | 631                                                  |
| Check treatments           | TW_0001, TW_0003, TW_0005, TW_0007, TW_0009, TW_0011 |

### ANOVA, Treatment Adjusted

| Source                             | Df  | Sum Sq | Mean Sq | F value | Pr(>F)   |
|------------------------------------|-----|--------|---------|---------|----------|
| Block (ignoring Treatments)        | 7   | 5.188  | 0.741   | 33.592  | 1.04E-13 |
| Treatment (eliminating Blocks)     | 636 | 8.073  | 0.013   | 0.575   | 0.994    |
| Treatment: Check                   | 5   | 0.094  | 0.019   | 0.848   | 0.525    |
| Treatment: Test and Test vs. Check | 631 | 7.980  | 0.013   | 0.573   | 0.994    |
| Residuals                          | 35  | 0.772  | 0.022   |         |          |

### ANOVA, Block Adjusted

| Source                         | Df  | Sum Sq | Mean Sq | F value | Pr(>F) |
|--------------------------------|-----|--------|---------|---------|--------|
| Treatment (ignoring Blocks)    | 636 | 12.64  | 0.020   | 0.901   | 0.693  |
| Treatment: Check               | 5   | 0.09   | 0.019   | 0.848   | 0.525  |
| Treatment: Test                | 630 | 12.46  | 0.020   | 0.896   | 0.700  |
| Treatment: Test vs. Check      | 1   | 0.09   | 0.093   | 4.221   | 0.047  |
| Block (eliminating Treatments) | 7   | 0.62   | 0.088   | 3.993   | 0.003  |
| Residuals                      | 35  | 0.77   | 0.022   |         |        |

## SL\_4 in Taipei

### Details

| Item                       | Details                                              |
|----------------------------|------------------------------------------------------|
| Number of blocks           | 8                                                    |
| Number of treatments       | 637                                                  |
| Number of check treatments | 6                                                    |
| Number of test treatments  | 631                                                  |
| Check treatments           | TW_0001, TW_0003, TW_0005, TW_0007, TW_0009, TW_0011 |

### ANOVA, Treatment Adjusted

| Source                             | Df  | Sum Sq  | Mean Sq | F value | Pr(>F)  |
|------------------------------------|-----|---------|---------|---------|---------|
| Block (ignoring Treatments)        | 7   | 9567.72 | 1366.82 | 164.23  | 7.8e-25 |
| Treatment (eliminating Blocks)     | 636 | 25568.1 | 40.2    | 4.83    | 1.8e-07 |
| Treatment: Check                   | 5   | 379     | 75.8    | 9.11    | 1.3e-05 |
| Treatment: Test and Test vs. Check | 631 | 25189.1 | 39.92   | 4.8     | 2e-07   |
| Residuals                          | 35  | 291.28  | 8.32    |         |         |

### ANOVA, Block Adjusted

| Source                         | Df  | Sum Sq   | Mean Sq | F value | Pr(>F)  |
|--------------------------------|-----|----------|---------|---------|---------|
| Treatment (ignoring Blocks)    | 636 | 33525.24 | 52.71   | 6.33    | 3.6e-09 |
| Treatment: Check               | 5   | 379      | 75.8    | 9.11    | 1.3e-05 |
| Treatment: Test                | 630 | 30447.32 | 48.33   | 5.81    | 1.3e-08 |
| Treatment: Test vs. Check      | 1   | 2698.92  | 2698.92 | 324.3   | 2.8e-19 |
| Block (eliminating Treatments) | 7   | 1610.58  | 230.08  | 27.65   | 1.8e-12 |
| Residuals                      | 35  | 291.28   | 8.32    |         |         |

## SL\_5 in Taipei

### Details

| Item                       | Details                                              |
|----------------------------|------------------------------------------------------|
| Number of blocks           | 8                                                    |
| Number of treatments       | 637                                                  |
| Number of check treatments | 6                                                    |
| Number of test treatments  | 631                                                  |
| Check treatments           | TW_0001, TW_0003, TW_0005, TW_0007, TW_0009, TW_0011 |

### ANOVA, Treatment Adjusted

| Source                             | Df  | Sum Sq   | Mean Sq | F value | Pr(>F)  |
|------------------------------------|-----|----------|---------|---------|---------|
| Block (ignoring Treatments)        | 7   | 37736.93 | 5390.99 | 179.42  | 1.7e-25 |
| Treatment (eliminating Blocks)     | 636 | 98336.17 | 154.62  | 5.15    | 7.3e-08 |
| Treatment: Check                   | 5   | 1417.16  | 283.43  | 9.43    | 9.2e-06 |
| Treatment: Test and Test vs. Check | 631 | 96919    | 153.6   | 5.11    | 8e-08   |
| Residuals                          | 35  | 1051.64  | 30.05   |         |         |

### ANOVA, Block Adjusted

| Source                         | Df  | Sum Sq    | Mean Sq | F value | Pr(>F)  |
|--------------------------------|-----|-----------|---------|---------|---------|
| Treatment (ignoring Blocks)    | 636 | 130426.21 | 205.07  | 6.83    | 1.2e-09 |
| Treatment: Check               | 5   | 1417.16   | 283.43  | 9.43    | 9.2e-06 |
| Treatment: Test                | 630 | 119335.72 | 189.42  | 6.3     | 3.9e-09 |
| Treatment: Test vs. Check      | 1   | 9673.32   | 9673.32 | 321.94  | 3.2e-19 |
| Block (eliminating Treatments) | 7   | 5646.89   | 806.7   | 26.85   | 2.8e-12 |
| Residuals                      | 35  | 1051.64   | 30.05   |         |         |

## SG\_5 in Taipei

### Details

| Item                       | Details                                              |
|----------------------------|------------------------------------------------------|
| Number of blocks           | 8                                                    |
| Number of treatments       | 637                                                  |
| Number of check treatments | 6                                                    |
| Number of test treatments  | 631                                                  |
| Check treatments           | TW_0001, TW_0003, TW_0005, TW_0007, TW_0009, TW_0011 |

### ANOVA, Treatment Adjusted

| Source                             | Df  | Sum Sq   | Mean Sq | F value | Pr(>F)   |
|------------------------------------|-----|----------|---------|---------|----------|
| Block (ignoring Treatments)        | 7   | 12754.01 | 1822.00 | 114.43  | 3.37E-22 |
| Treatment (eliminating Blocks)     | 636 | 35756.95 | 56.22   | 3.53    | 1.17E-05 |
| Treatment: Check                   | 5   | 404.14   | 80.83   | 5.08    | 0.0013   |
| Treatment: Test and Test vs. Check | 631 | 35352.81 | 56.03   | 3.52    | 1.23E-05 |
| Residuals                          | 35  | 557.29   | 15.92   |         |          |

### ANOVA, Block Adjusted

| Source                         | Df  | Sum Sq   | Mean Sq | F value | Pr(>F)   |
|--------------------------------|-----|----------|---------|---------|----------|
| Treatment (ignoring Blocks)    | 636 | 47100.29 | 74.06   | 4.65    | 3.00E-07 |
| Treatment: Check               | 5   | 404.14   | 80.83   | 5.08    | 0.0013   |
| Treatment: Test                | 630 | 44543.01 | 70.70   | 4.44    | 5.69E-07 |
| Treatment: Test vs. Check      | 1   | 2153.14  | 2153.14 | 135.23  | 1.42E-13 |
| Block (eliminating Treatments) | 7   | 1410.67  | 201.52  | 12.66   | 5.78E-08 |
| Residuals                      | 35  | 557.29   | 15.92   |         |          |

## SRGR\_5 in Taipei

### Details

| Item                       | Details                                              |
|----------------------------|------------------------------------------------------|
| Number of blocks           | 8                                                    |
| Number of treatments       | 637                                                  |
| Number of check treatments | 6                                                    |
| Number of test treatments  | 631                                                  |
| Check treatments           | TW_0001, TW_0003, TW_0005, TW_0007, TW_0009, TW_0011 |

### ANOVA, Treatment Adjusted

| Source                             | Df  | Sum Sq | Mean Sq | F value | Pr(>F)   |
|------------------------------------|-----|--------|---------|---------|----------|
| Block (ignoring Treatments)        | 7   | 11.47  | 1.64    | 30.13   | 5.19E-13 |
| Treatment (eliminating Blocks)     | 636 | 42.06  | 0.07    | 1.22    | 0.24     |
| Treatment: Check                   | 5   | 0.25   | 0.05    | 0.93    | 0.47     |
| Treatment: Test and Test vs. Check | 631 | 41.81  | 0.07    | 1.22    | 0.24     |
| Residuals                          | 35  | 1.90   | 0.05    |         |          |

### ANOVA, Block Adjusted

| Source                         | Df  | Sum Sq | Mean Sq | F value | Pr(>F) |
|--------------------------------|-----|--------|---------|---------|--------|
| Treatment (ignoring Blocks)    | 636 | 52.50  | 0.083   | 1.518   | 0.064  |
| Treatment: Check               | 5   | 0.25   | 0.050   | 0.928   | 0.474  |
| Treatment: Test                | 630 | 52.25  | 0.083   | 1.525   | 0.062  |
| Treatment: Test vs. Check      | 1   | 0.00   | 0.00041 | 0.00760 | 0.931  |
| Block (eliminating Treatments) | 7   | 1.02   | 0.146   | 2.684   | 0.025  |
| Residuals                      | 35  | 1.90   | 0.054   |         |        |

## *RN in Aberdeen*

### Details

| Item                       | Details          |
|----------------------------|------------------|
| Number of blocks           | 12               |
| Number of treatments       | 647              |
| Number of check treatments | 2                |
| Number of test treatments  | 645              |
| Check treatments           | TW_0001, TW_0003 |

### ANOVA, Treatment Adjusted

| Source                             | Df  | Sum Sq | Mean Sq | F value | Pr(>F)  |
|------------------------------------|-----|--------|---------|---------|---------|
| Block (ignoring Treatments)        | 11  | 14.5   | 1.32    | 50.87   | 2e-47   |
| Treatment (eliminating Blocks)     | 646 | 128.35 | 0.2     | 7.67    | 5.5e-41 |
| Treatment: Check                   | 1   | 1.8    | 1.8     | 69.65   | 2.6e-14 |
| Treatment: Test and Test vs. Check | 645 | 126.55 | 0.2     | 7.57    | 1.3e-40 |
| Residuals                          | 166 | 4.3    | 0.03    |         |         |

### ANOVA, Block Adjusted

| Source                         | Df  | Sum Sq | Mean Sq | F value | Pr(>F)  |
|--------------------------------|-----|--------|---------|---------|---------|
| Treatment (ignoring Blocks)    | 646 | 142.48 | 0.22    | 8.51    | 3.5e-44 |
| Treatment: Check               | 1   | 0.54   | 0.54    | 21.03   | 8.9e-06 |
| Treatment: Test                | 644 | 132.05 | 0.21    | 7.92    | 6.2e-42 |
| Treatment: Test vs. Check      | 1   | 9.88   | 9.88    | 381.42  | 7.2e-45 |
| Block (eliminating Treatments) | 11  | 0.37   | 0.03    | 1.3     | 0.23    |
| Residuals                      | 166 | 4.3    | 0.03    |         |         |

## RSA\_4 in Aberdeen

### Details

| Item                       | Details          |
|----------------------------|------------------|
| Number of blocks           | 12               |
| Number of treatments       | 647              |
| Number of check treatments | 2                |
| Number of test treatments  | 645              |
| Check treatments           | TW_0001, TW_0003 |

### ANOVA, Treatment Adjusted

| Source                             | Df  | Sum Sq    | Mean Sq | F value | Pr(>F)  |
|------------------------------------|-----|-----------|---------|---------|---------|
| Block (ignoring Treatments)        | 11  | 218102.45 | 19827.5 | 28.82   | 4.6e-33 |
| Treatment (eliminating Blocks)     | 646 | 428852.33 | 663.86  | 0.97    | 0.62    |
| Treatment: Check                   | 1   | 1968.26   | 1968.26 | 2.86    | 0.09    |
| Treatment: Test and Test vs. Check | 645 | 426884.07 | 661.84  | 0.96    | 0.63    |
| Residuals                          | 166 | 114190.69 | 687.9   |         |         |

### ANOVA, Block Adjusted

| Source                         | Df  | Sum Sq    | Mean Sq | F value | Pr(>F) |
|--------------------------------|-----|-----------|---------|---------|--------|
| Treatment (ignoring Blocks)    | 646 | 626010.67 | 969.06  | 1.41    | 0.0039 |
| Treatment: Check               | 1   | 650.23    | 650.23  | 0.95    | 0.33   |
| Treatment: Test                | 644 | 625246.66 | 970.88  | 1.41    | 0.0037 |
| Treatment: Test vs. Check      | 1   | 113.77    | 113.77  | 0.17    | 0.68   |
| Block (eliminating Treatments) | 11  | 20944.11  | 1904.01 | 2.77    | 0.0025 |
| Residuals                      | 166 | 114190.69 | 687.9   |         |        |

## RSA\_5 in Aberdeen

### Details

| Item                       | Details          |
|----------------------------|------------------|
| Number of blocks           | 12               |
| Number of treatments       | 647              |
| Number of check treatments | 2                |
| Number of test treatments  | 645              |
| Check treatments           | TW_0001, TW_0003 |

### ANOVA, Treatment Adjusted

| Source                             | Df  | Sum Sq    | Mean Sq  | F value | Pr(>F)  |
|------------------------------------|-----|-----------|----------|---------|---------|
| Block (ignoring Treatments)        | 11  | 558840.49 | 50803.68 | 65.12   | 2.3e-54 |
| Treatment (eliminating Blocks)     | 646 | 559061.89 | 865.42   | 1.11    | 0.21    |
| Treatment: Check                   | 1   | 290.59    | 290.59   | 0.37    | 0.54    |
| Treatment: Test and Test vs. Check | 645 | 558771.31 | 866.31   | 1.11    | 0.21    |
| Residuals                          | 166 | 129515.04 | 780.21   |         |         |

### ANOVA, Block Adjusted

| Source                         | Df  | Sum Sq     | Mean Sq  | F value | Pr(>F)  |
|--------------------------------|-----|------------|----------|---------|---------|
| Treatment (ignoring Blocks)    | 646 | 1087372.47 | 1683.24  | 2.16    | 4.7e-09 |
| Treatment: Check               | 1   | 12192.72   | 12192.72 | 15.63   | 0.00011 |
| Treatment: Test                | 644 | 1062234.86 | 1649.43  | 2.11    | 1.1e-08 |
| Treatment: Test vs. Check      | 1   | 12944.89   | 12944.89 | 16.59   | 7.2e-05 |
| Block (eliminating Treatments) | 11  | 30529.91   | 2775.45  | 3.56    | 0.00017 |
| Residuals                      | 166 | 129515.04  | 780.21   |         |         |



## AVRSA in Aberdeen

### Details

| Item                       | Details          |
|----------------------------|------------------|
| Number of blocks           | 12               |
| Number of treatments       | 647              |
| Number of check treatments | 2                |
| Number of test treatments  | 645              |
| Check treatments           | TW_0001, TW_0003 |

### ANOVA, Treatment Adjusted

| Source                             | Df  | Sum Sq   | Mean Sq | F value | Pr(>F)  |
|------------------------------------|-----|----------|---------|---------|---------|
| Block (ignoring Treatments)        | 11  | 46262.57 | 4205.69 | 47.81   | 9.9e-46 |
| Treatment (eliminating Blocks)     | 646 | 50589.43 | 78.31   | 0.89    | 0.84    |
| Treatment: Check                   | 1   | 171.45   | 171.45  | 1.95    | 0.16    |
| Treatment: Test and Test vs. Check | 645 | 50417.98 | 78.17   | 0.89    | 0.84    |
| Residuals                          | 166 | 14602.4  | 87.97   |         |         |

### ANOVA, Block Adjusted

| Source                         | Df  | Sum Sq   | Mean Sq | F value | Pr(>F)  |
|--------------------------------|-----|----------|---------|---------|---------|
| Treatment (ignoring Blocks)    | 646 | 93560.89 | 144.83  | 1.65    | 6.6e-05 |
| Treatment: Check               | 1   | 2022.08  | 2022.08 | 22.99   | 3.6e-06 |
| Treatment: Test                | 644 | 91533.35 | 142.13  | 1.62    | 0.00011 |
| Treatment: Test vs. Check      | 1   | 5.45     | 5.45    | 0.06    | 0.8     |
| Block (eliminating Treatments) | 11  | 3291.11  | 299.19  | 3.4     | 0.00028 |
| Residuals                      | 166 | 14602.4  | 87.97   |         |         |

## RG\_5 in Aberdeen

### Details

| Item                       | Details          |
|----------------------------|------------------|
| Number of blocks           | 12               |
| Number of treatments       | 647              |
| Number of check treatments | 2                |
| Number of test treatments  | 645              |
| Check treatments           | TW_0001, TW_0003 |

### ANOVA, Treatment Adjusted

| Source                             | Df  | Sum Sq    | Mean Sq  | F value | Pr(>F)   |
|------------------------------------|-----|-----------|----------|---------|----------|
| Block (ignoring Treatments)        | 11  | 164130.06 | 14920.91 | 12.12   | 1.52E-16 |
| Treatment (eliminating Blocks)     | 646 | 165803.18 | 256.66   | 0.21    | 1        |
| Treatment: Check                   | 1   | 746.30    | 746.30   | 0.61    | 0.44     |
| Treatment: Test and Test vs. Check | 645 | 165056.88 | 255.90   | 0.21    | 1        |
| Residuals                          | 166 | 204384.28 | 1231.23  |         |          |

### ANOVA, Block Adjusted

| Source                         | Df  | Sum Sq    | Mean Sq  | F value | Pr(>F)   |
|--------------------------------|-----|-----------|----------|---------|----------|
| Treatment (ignoring Blocks)    | 646 | 310470.35 | 480.60   | 0.39    | 1        |
| Treatment: Check               | 1   | 7211.57   | 7211.57  | 5.86    | 1.66E-02 |
| Treatment: Test                | 644 | 292627.29 | 454.39   | 0.37    | 1        |
| Treatment: Test vs. Check      | 1   | 10631.49  | 10631.49 | 8.63    | 0.0038   |
| Block (eliminating Treatments) | 11  | 19462.89  | 1769.35  | 1.44    | 0.16     |
| Residuals                      | 166 | 204384.28 | 1231.23  |         |          |

## RRGR\_5 in Aberdeen

### Details

| Item                       | Details          |
|----------------------------|------------------|
| Number of blocks           | 12               |
| Number of treatments       | 647              |
| Number of check treatments | 2                |
| Number of test treatments  | 645              |
| Check treatments           | TW_0001, TW_0003 |

### ANOVA, Treatment Adjusted

| Source                             | Df  | Sum Sq | Mean Sq | F value | Pr(>F)   |
|------------------------------------|-----|--------|---------|---------|----------|
| Block (ignoring Treatments)        | 11  | 19.85  | 1.80    | 6.65    | 3.68E-09 |
| Treatment (eliminating Blocks)     | 646 | 31.30  | 0.05    | 0.18    | 1        |
| Treatment: Check                   | 1   | 0.30   | 0.30    | 1.10    | 0.30     |
| Treatment: Test and Test vs. Check | 645 | 31.00  | 0.05    | 0.18    | 1        |
| Residuals                          | 166 | 45.08  | 0.27    |         |          |

### ANOVA, Block Adjusted

| Source                         | Df  | Sum Sq   | Mean Sq  | F value | Pr(>F)   |
|--------------------------------|-----|----------|----------|---------|----------|
| Treatment (ignoring Blocks)    | 646 | 48.35    | 0.075    | 0.28    | 1        |
| Treatment: Check               | 1   | 4.08     | 4.079    | 15.02   | 0.000153 |
| Treatment: Test                | 644 | 44.27    | 0.069    | 0.25    | 1        |
| Treatment: Test vs. Check      | 1   | 0.002008 | 0.002008 | 0.0074  | 0.93     |
| Block (eliminating Treatments) | 11  | 2.80     | 0.25     | 0.94    | 0.51     |
| Residuals                      | 166 | 45.08    | 0.27     |         |          |
